# Supplementary material for: Identification of 5-HT2A receptor signaling pathways associated with psychedelic potential
Source: PubMed Central journal article supplement (PMC10724237; doi:10.1038/s41467-023-44016-1), 2023-12-15

# <sup>1</sup>H NMR Spectra for Synthesized *N*-benzyl-phenethylamines.

## Spectra 1. <sup>1</sup>H NMR of 25N-NB (2) HCl.

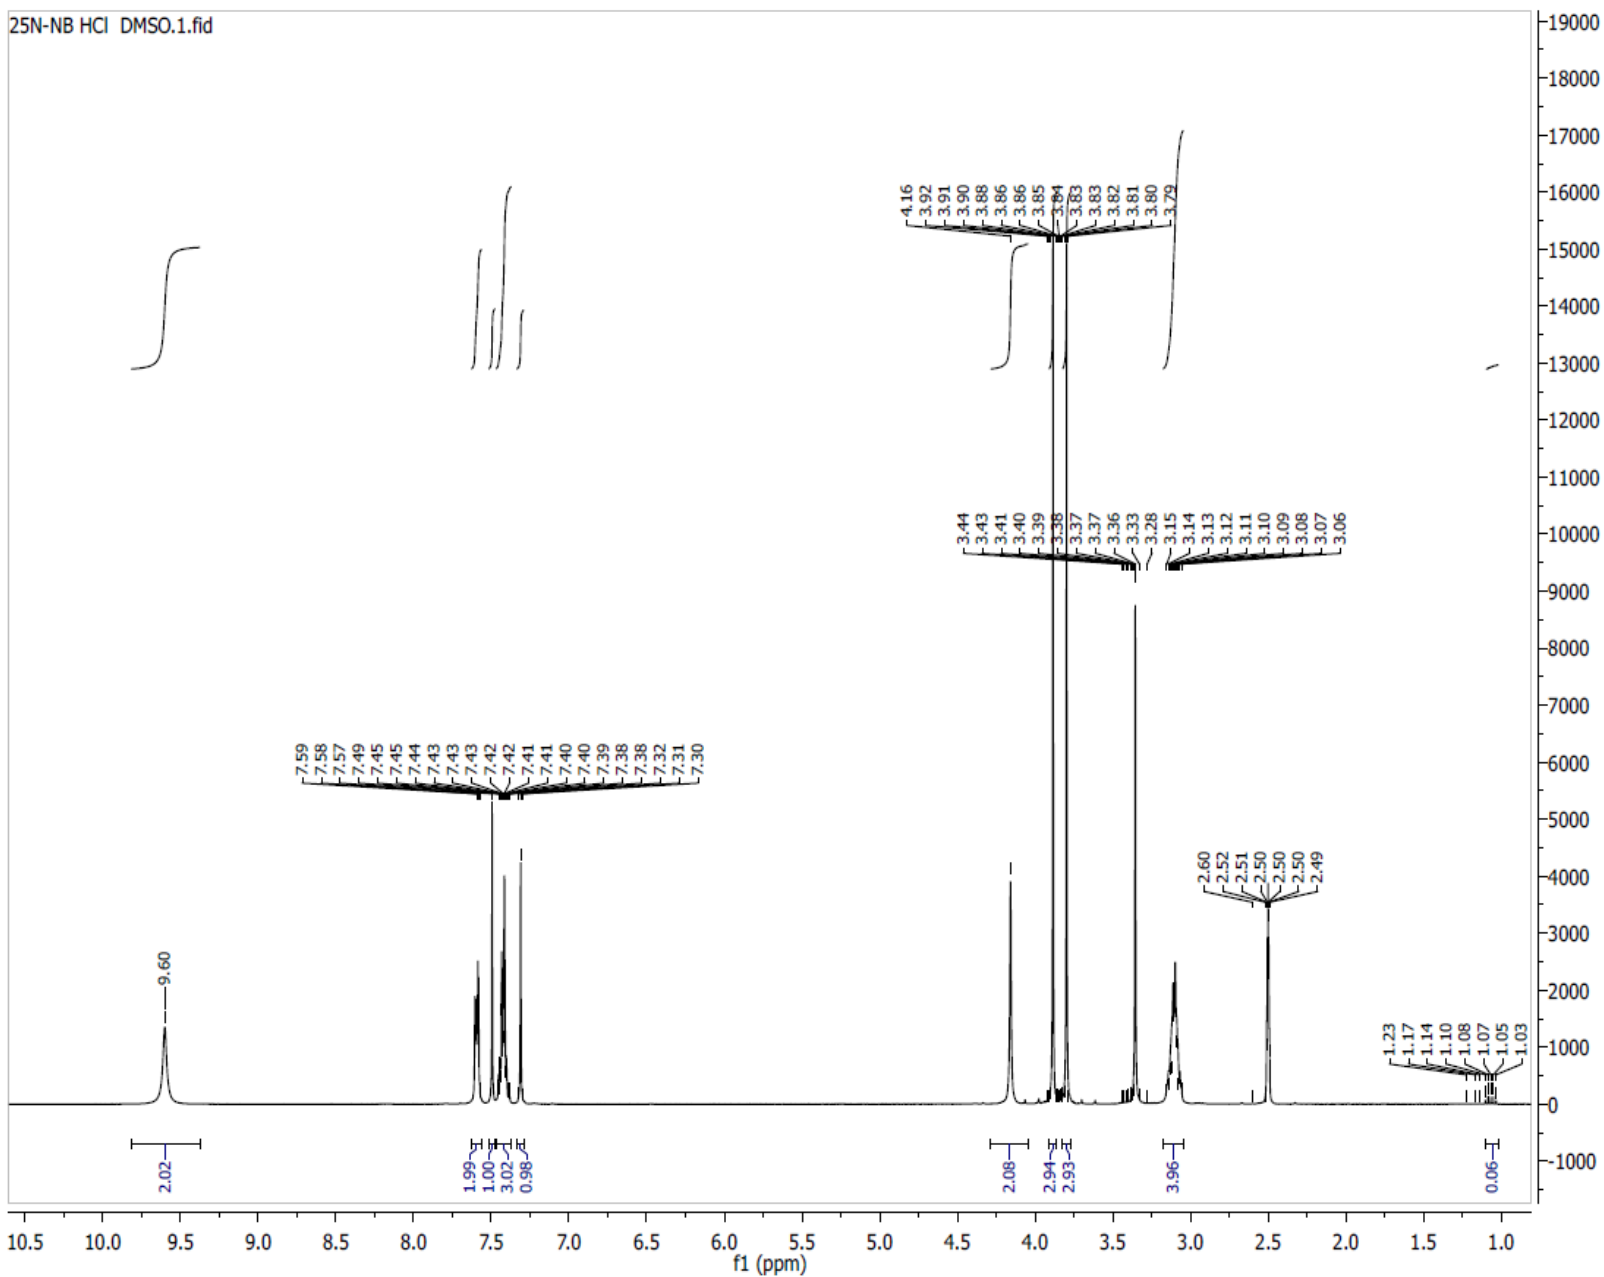

# Spectra 2. <sup>1</sup>H NMR of 25N-NBOH (3) HCl

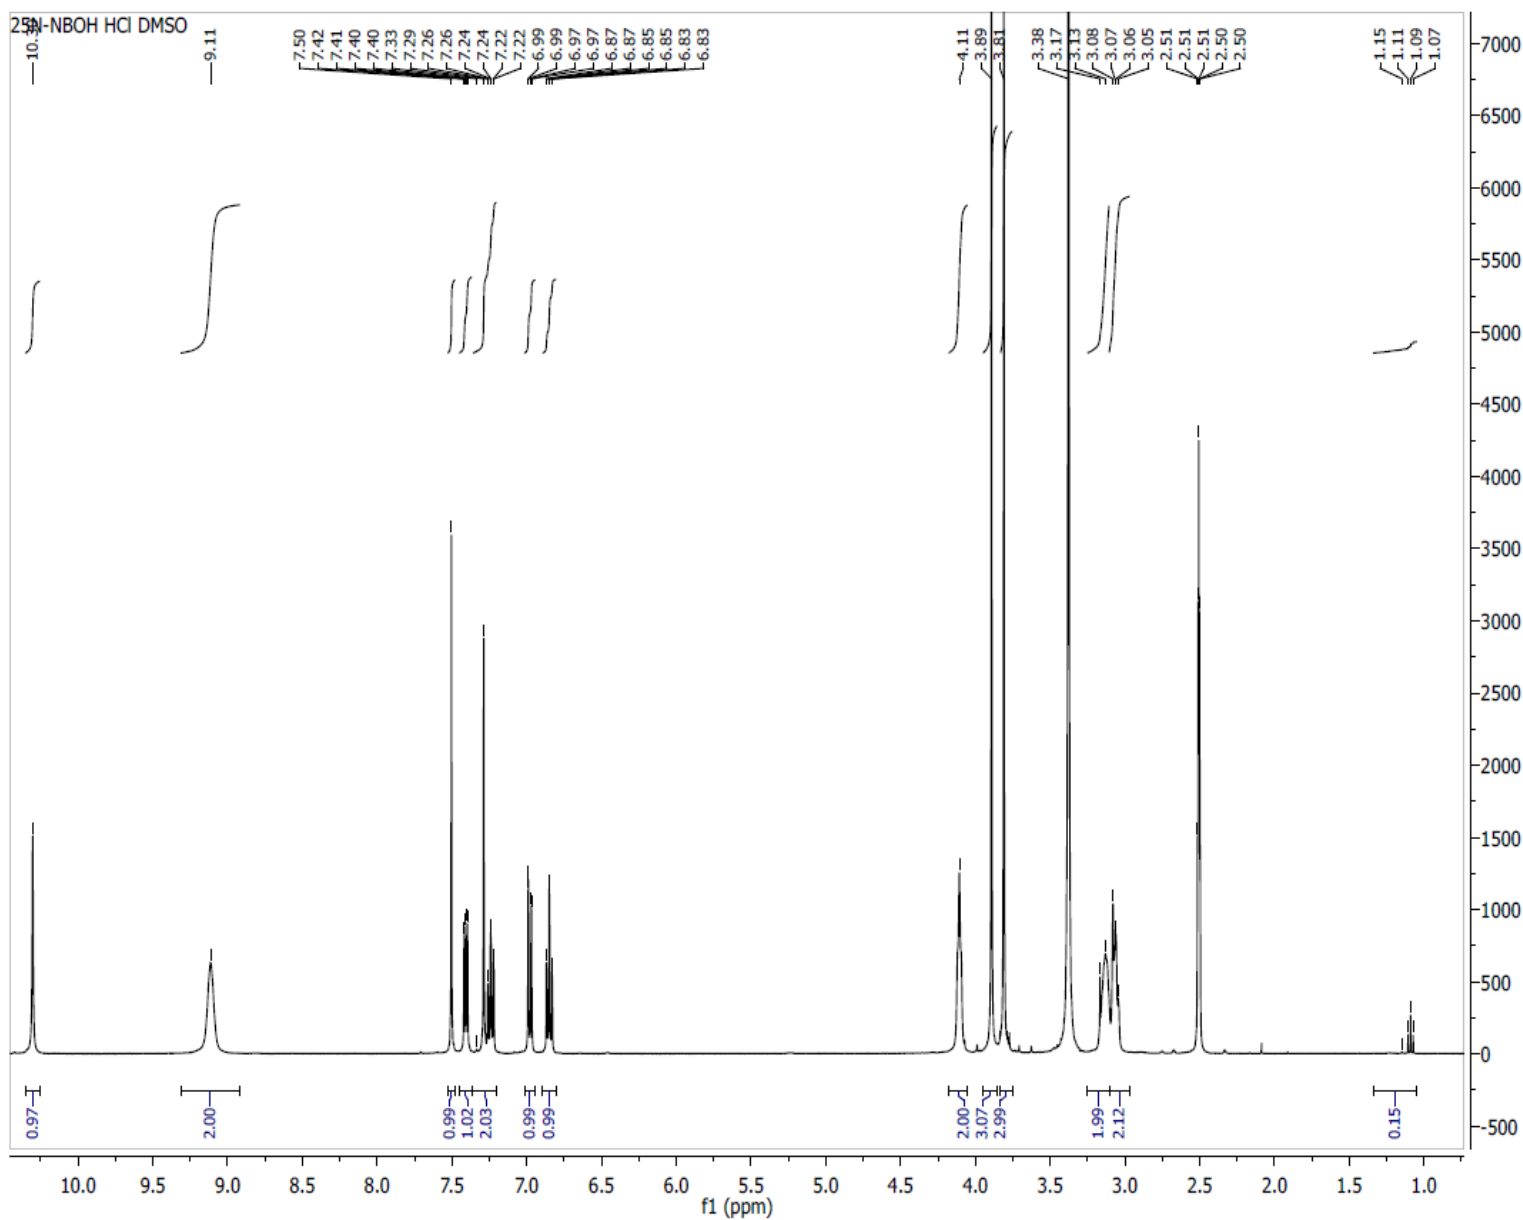

### Spectra 3. <sup>1</sup>H NMR of 25N-NBOMe (4) HCl

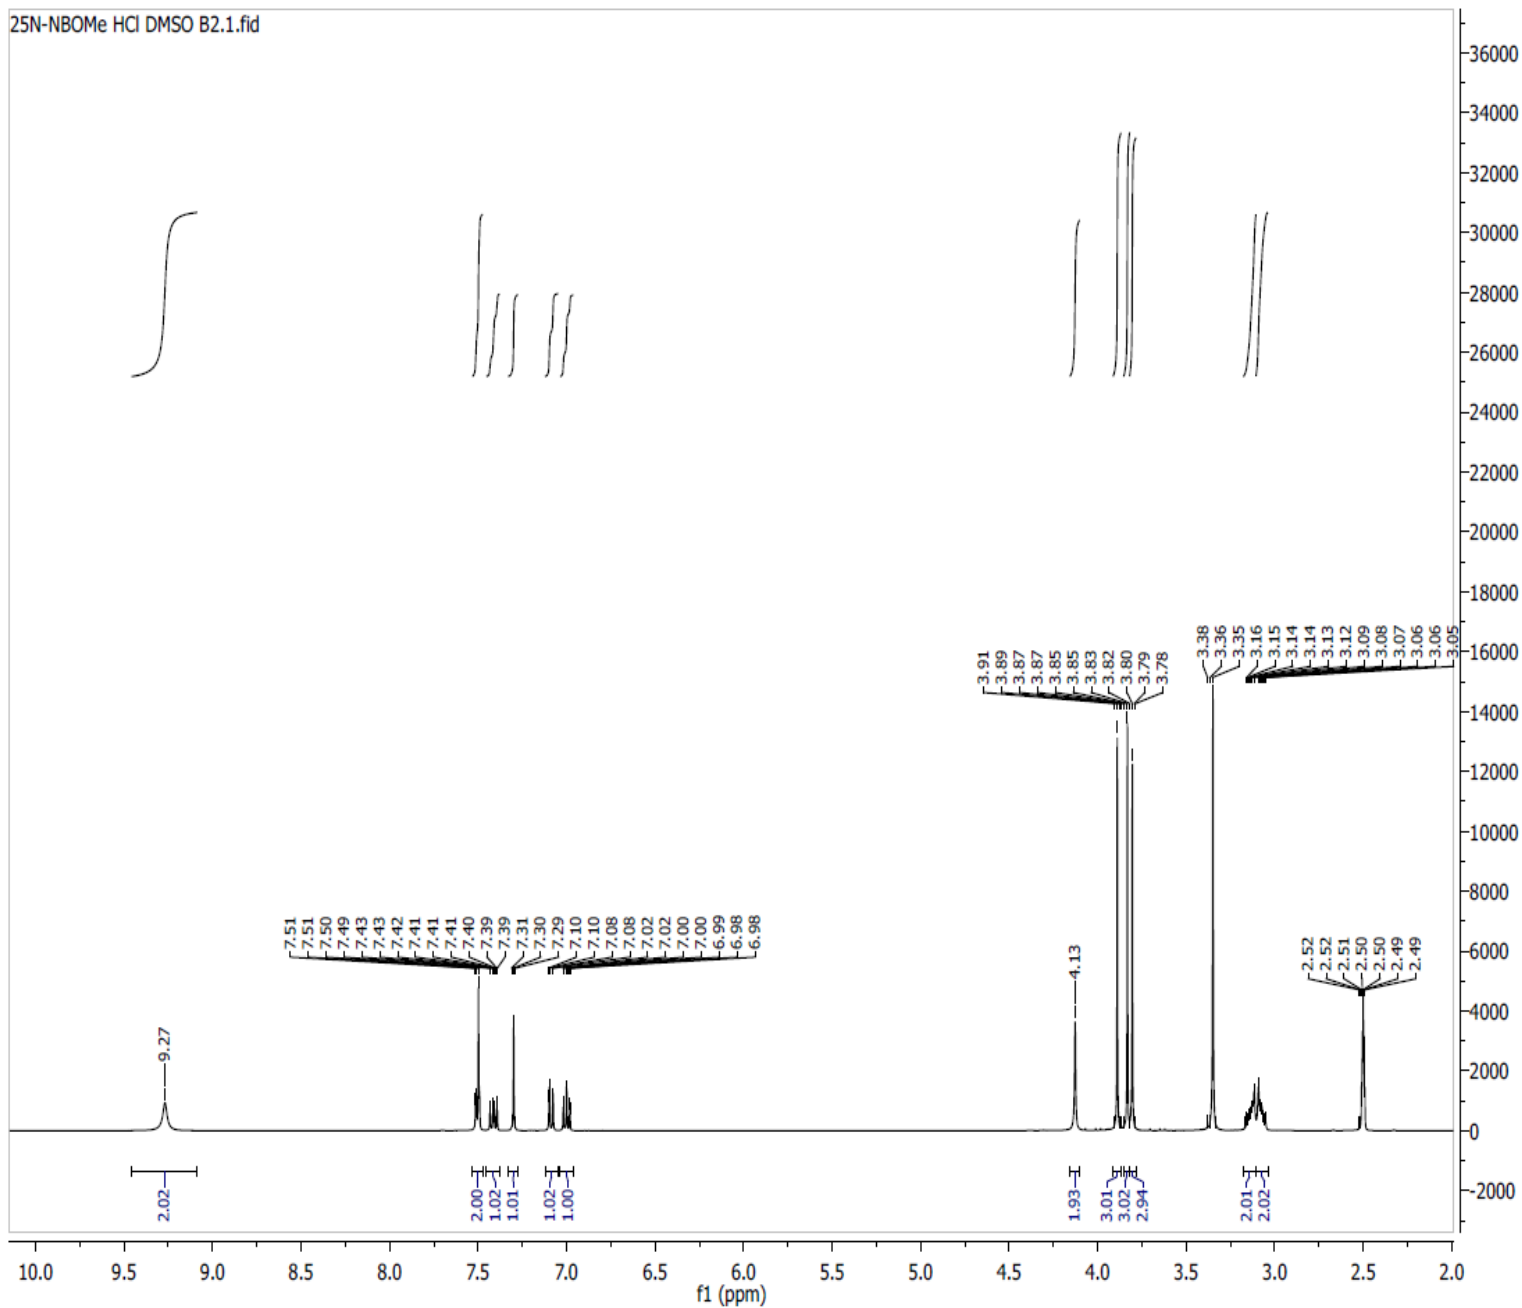

# Spectra 4. <sup>1</sup>H NMR of 25N-NBOEt (5) HCl

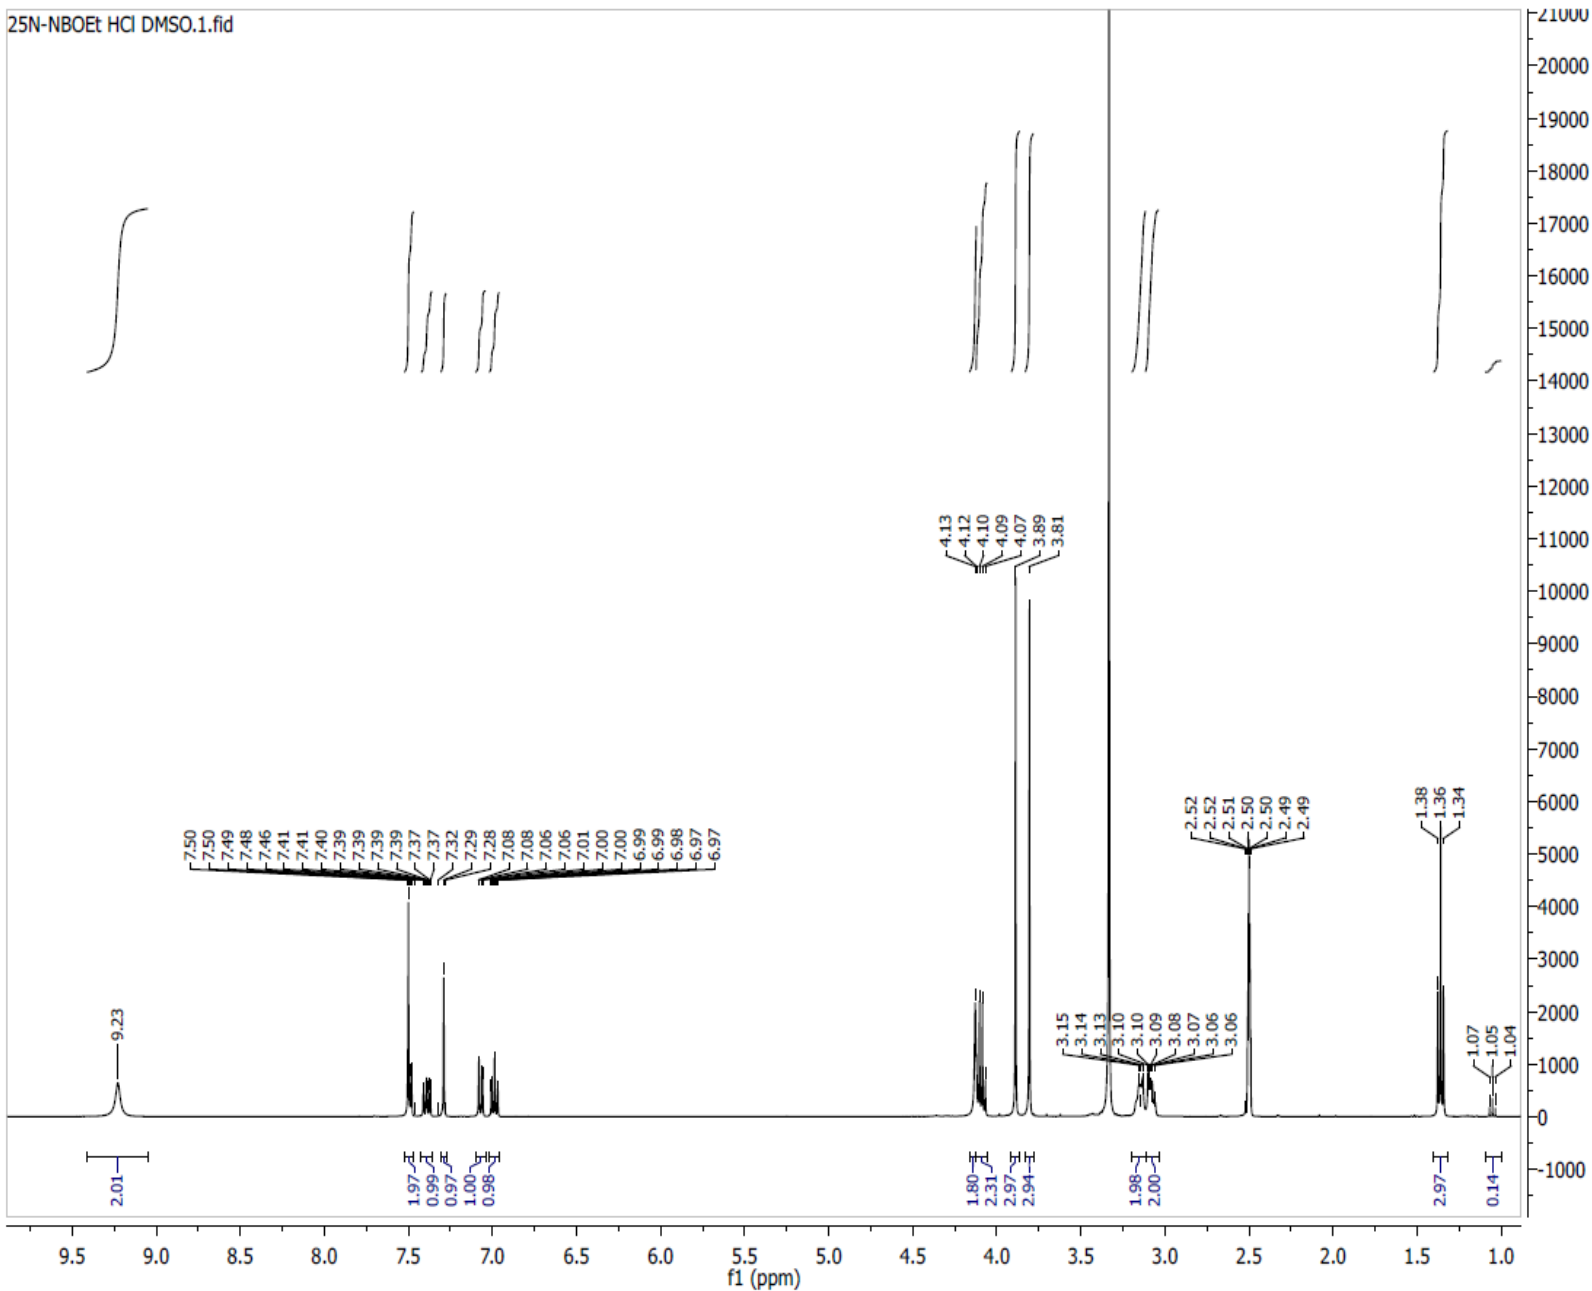

# Spectra 5. <sup>1</sup>H NMR of 25N-NBMe (6) HCl

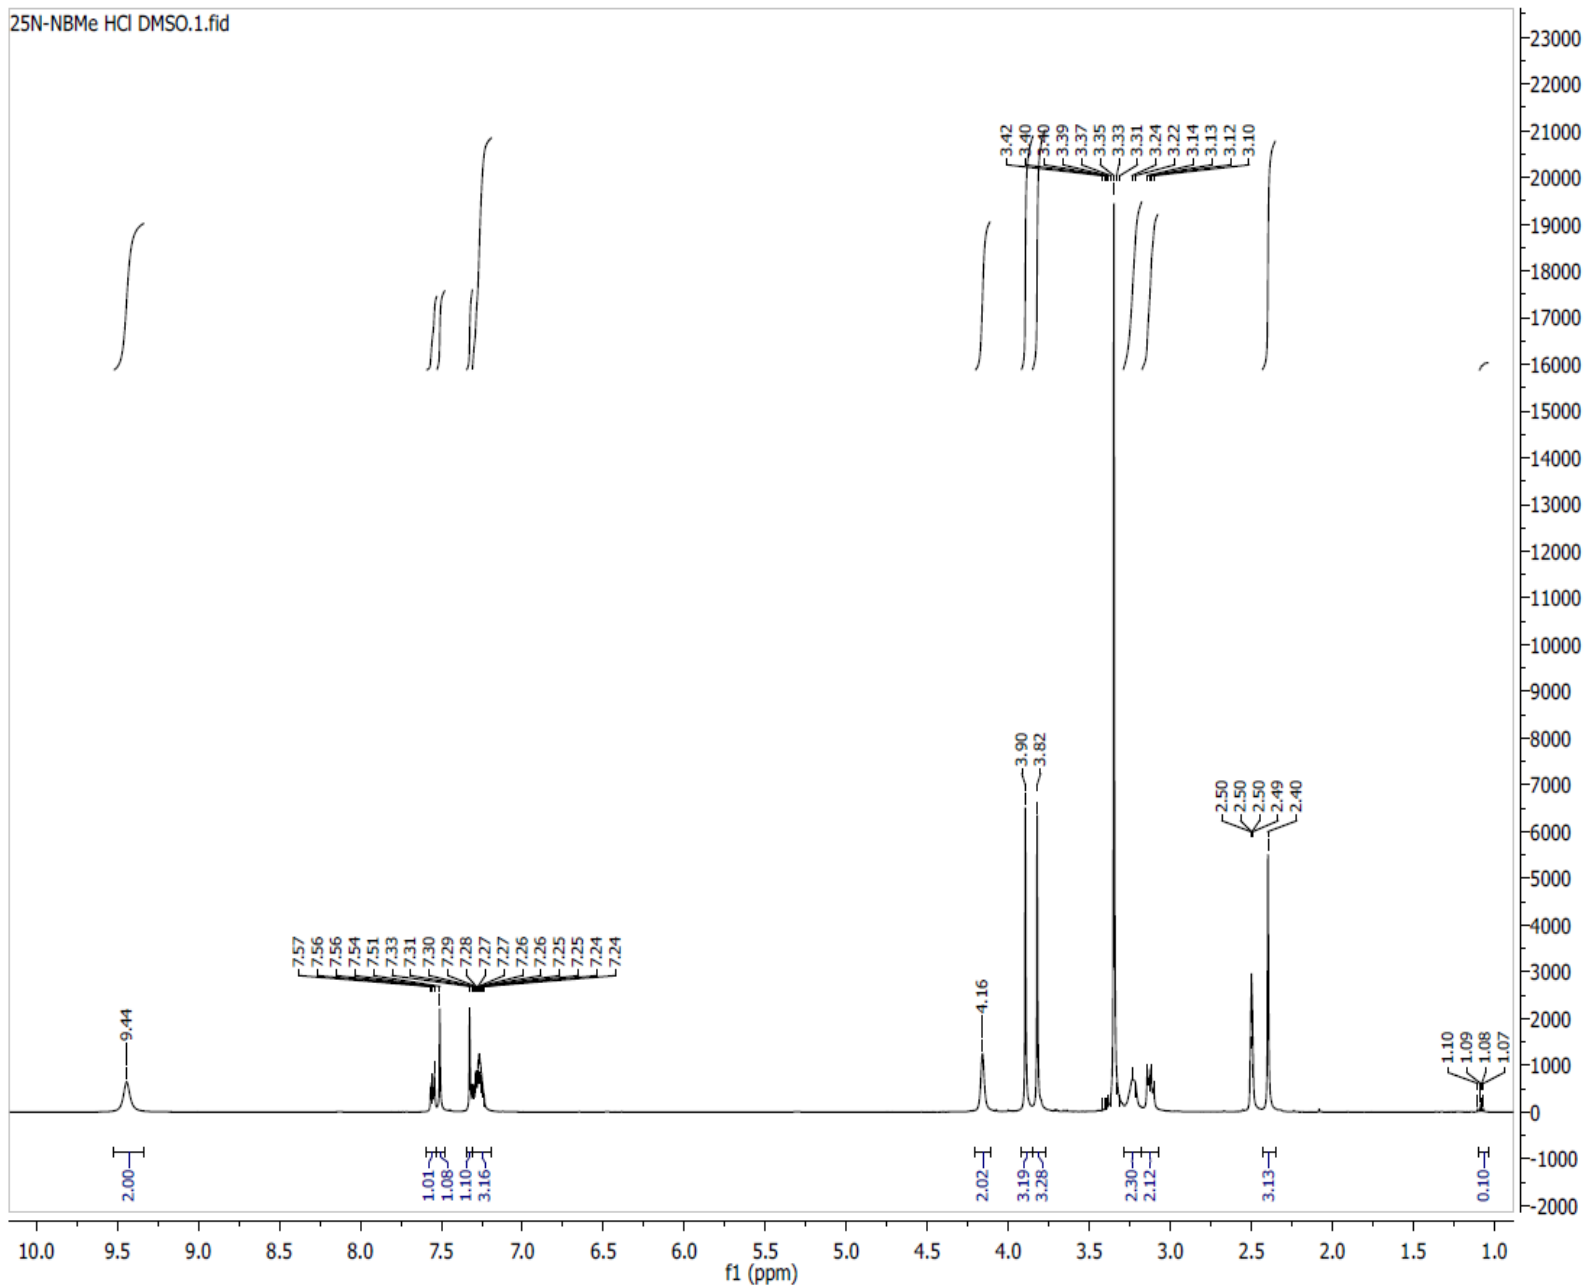

# Spectra 6. <sup>1</sup>H NMR of 25N-NBF (7) HCl

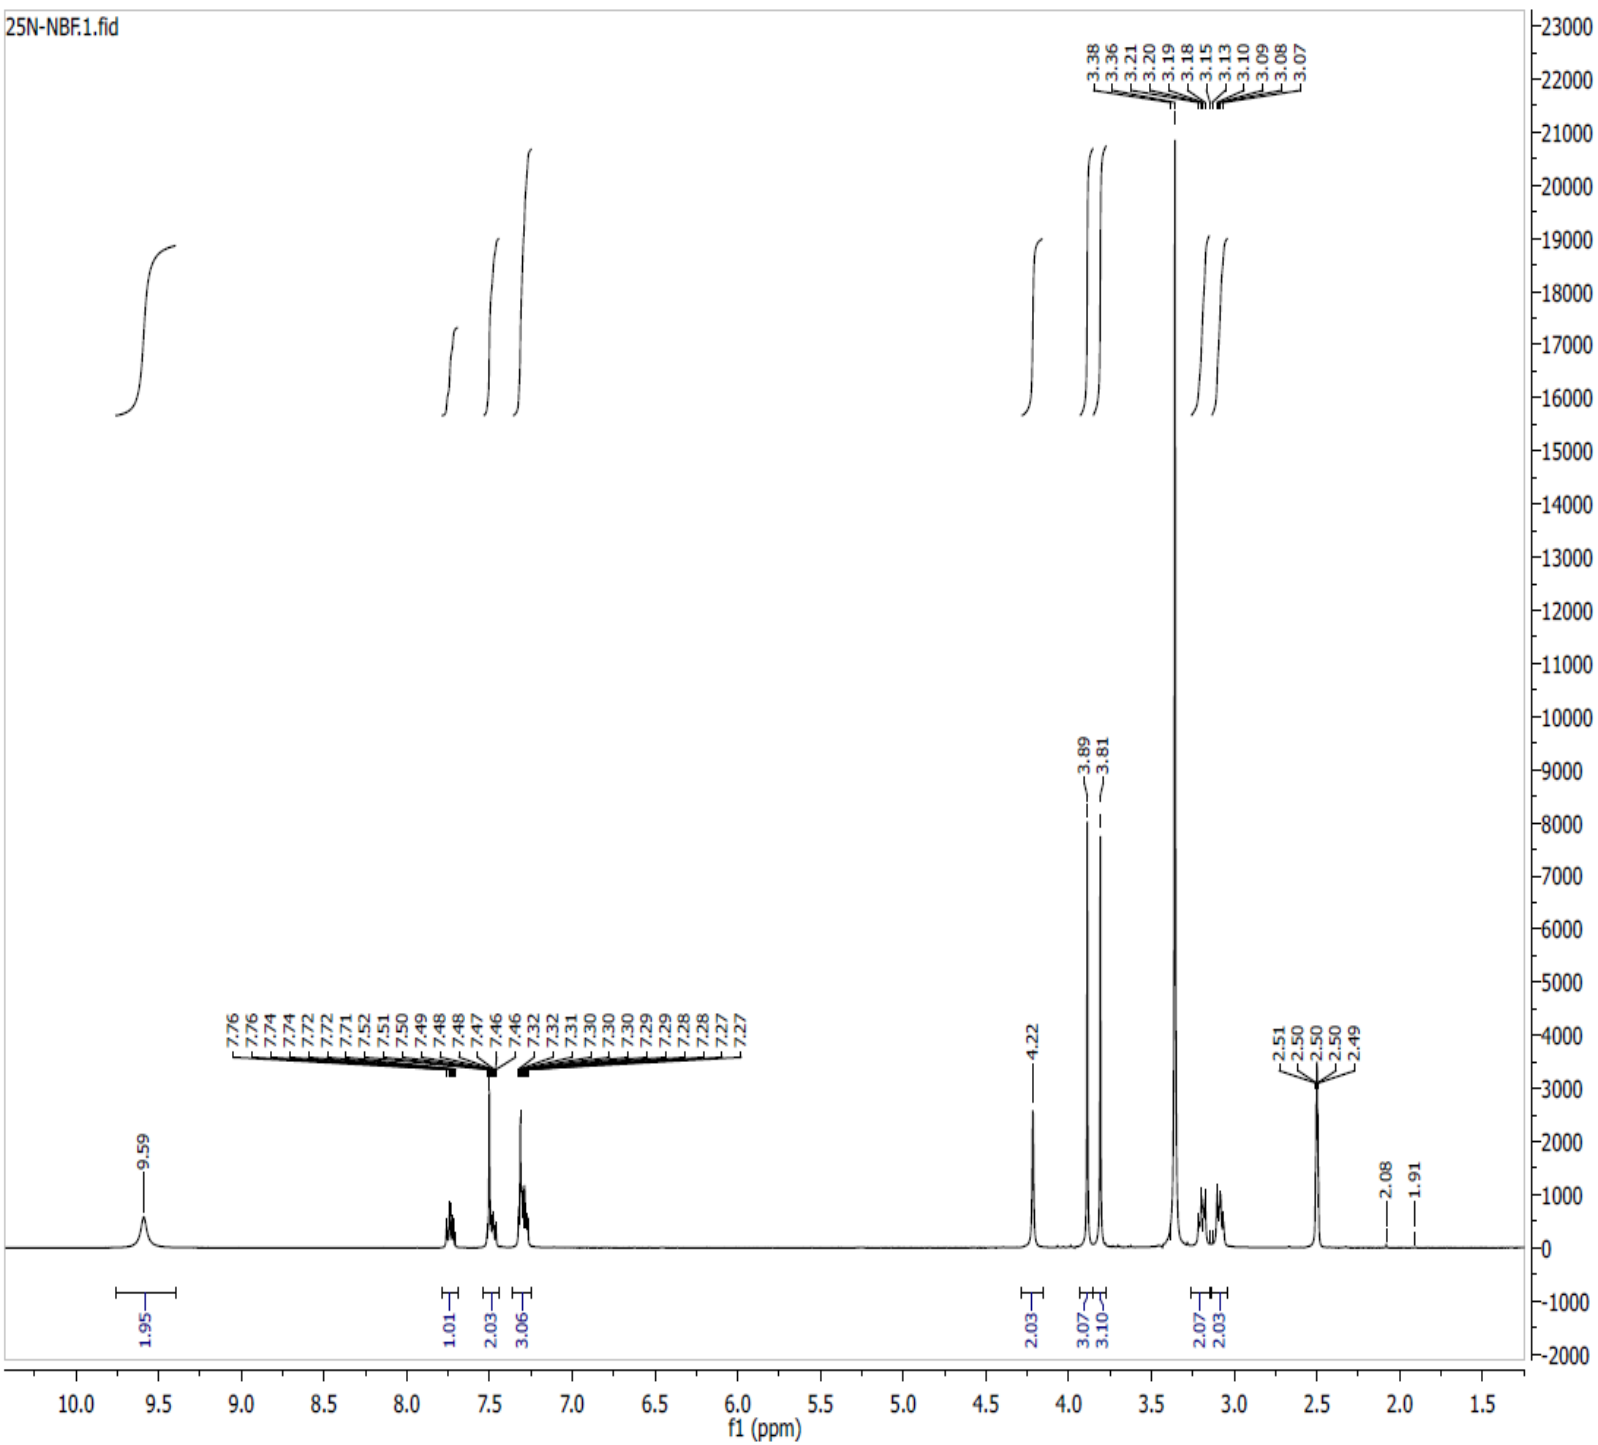

# Spectra 7. <sup>1</sup>H NMR of 25N-NBCl (8) HCl

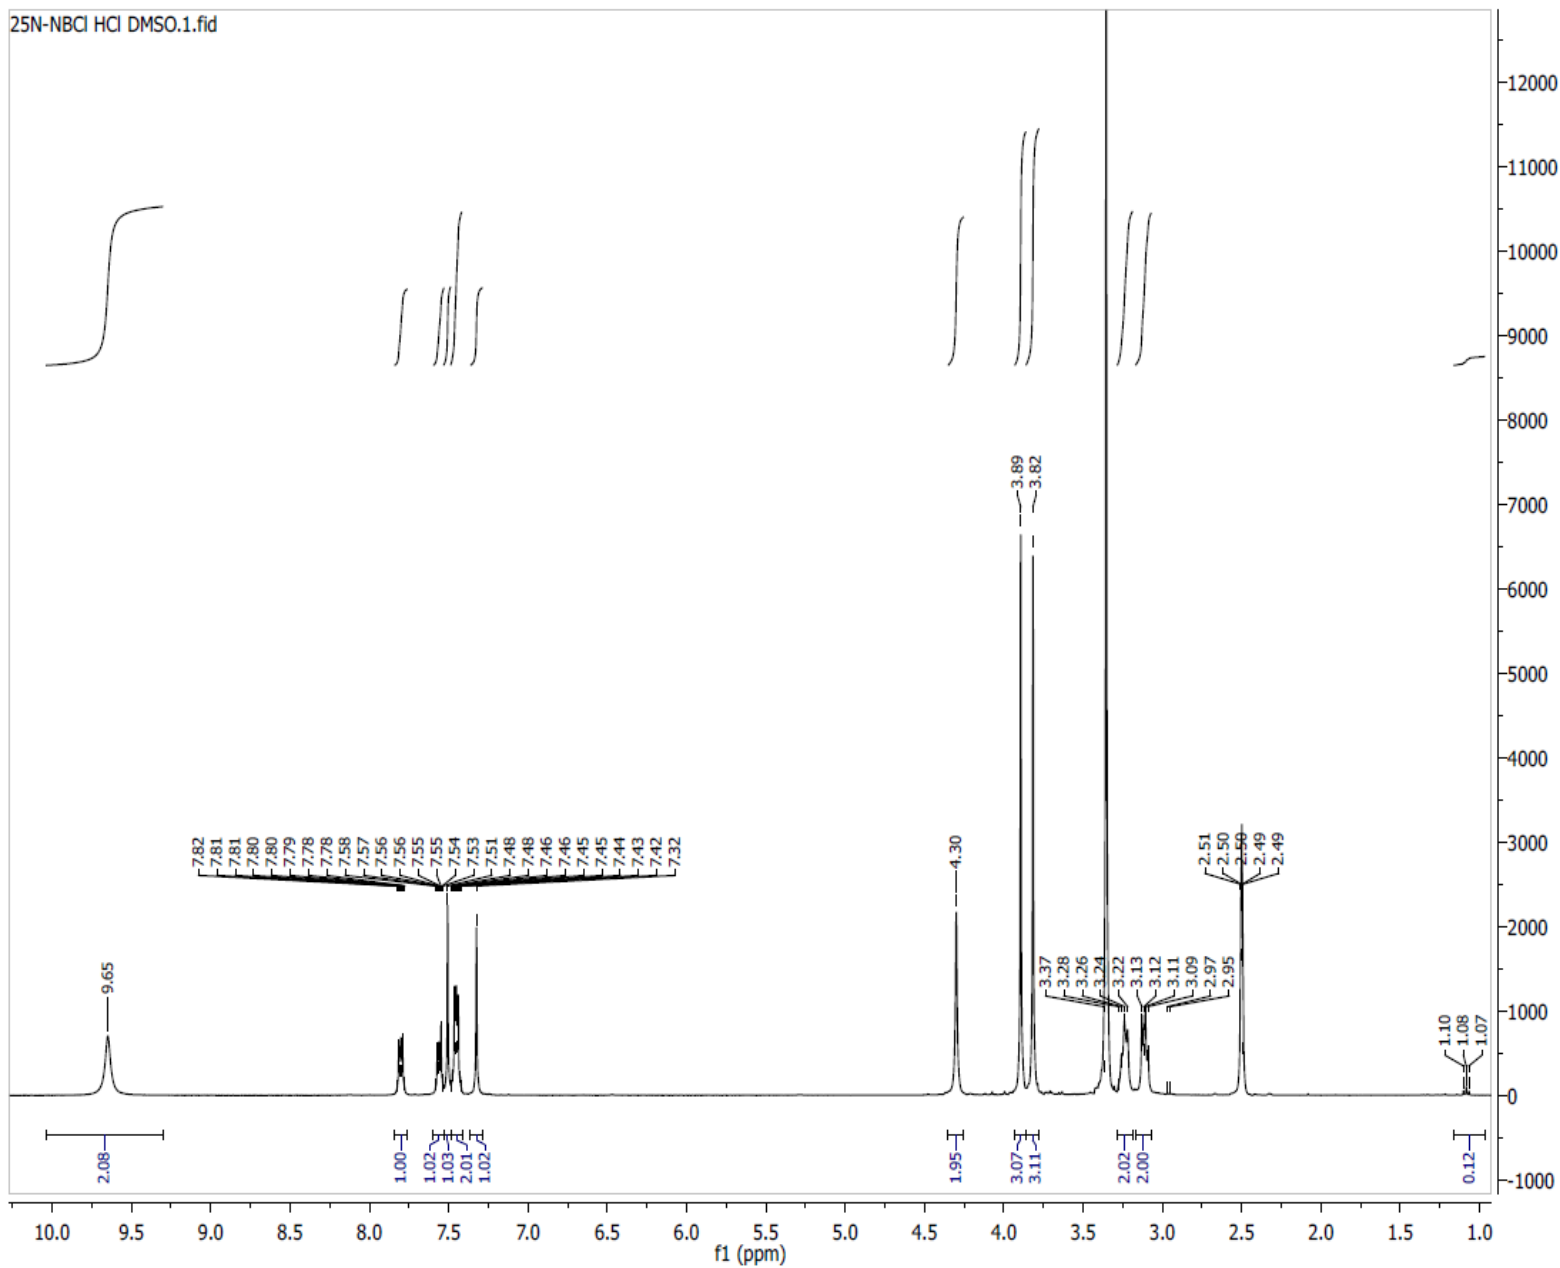

# Spectra 8. <sup>1</sup>H NMR of 25N-NBBr (9) HCl

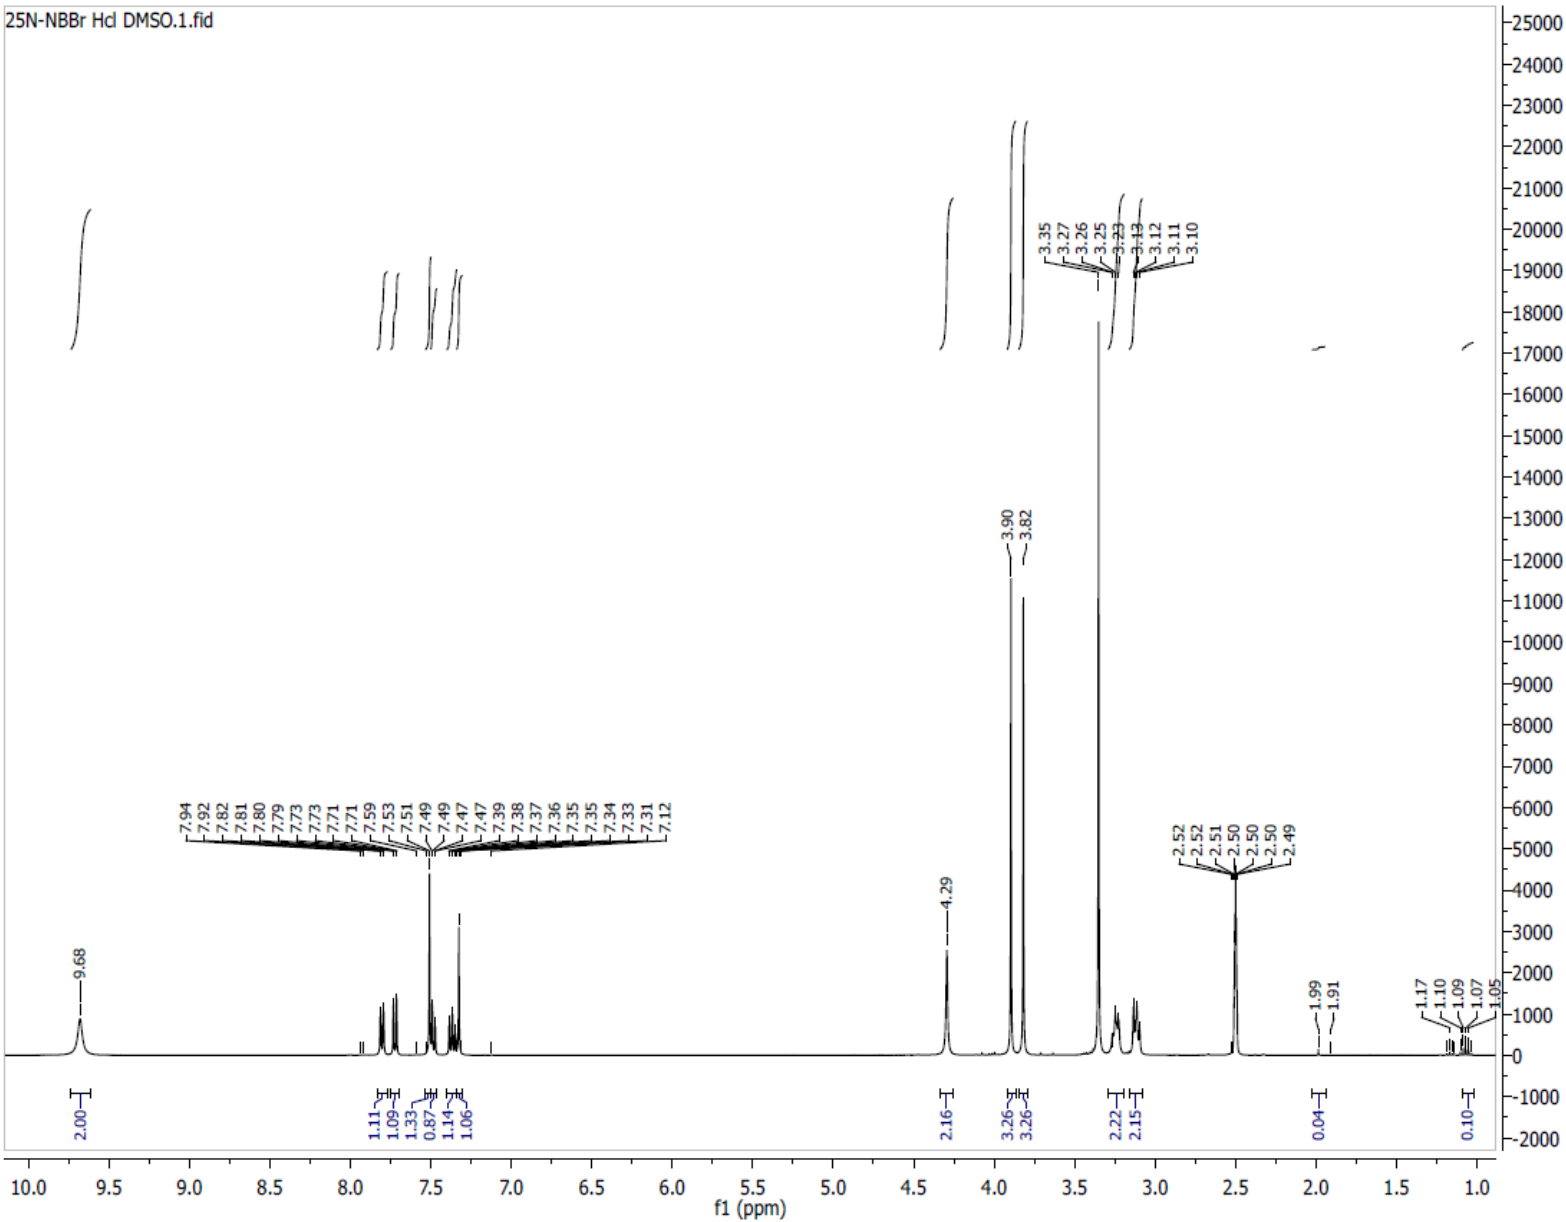



# Spectra 9. <sup>1</sup>H NMR of 25N-NBI (10) HCl

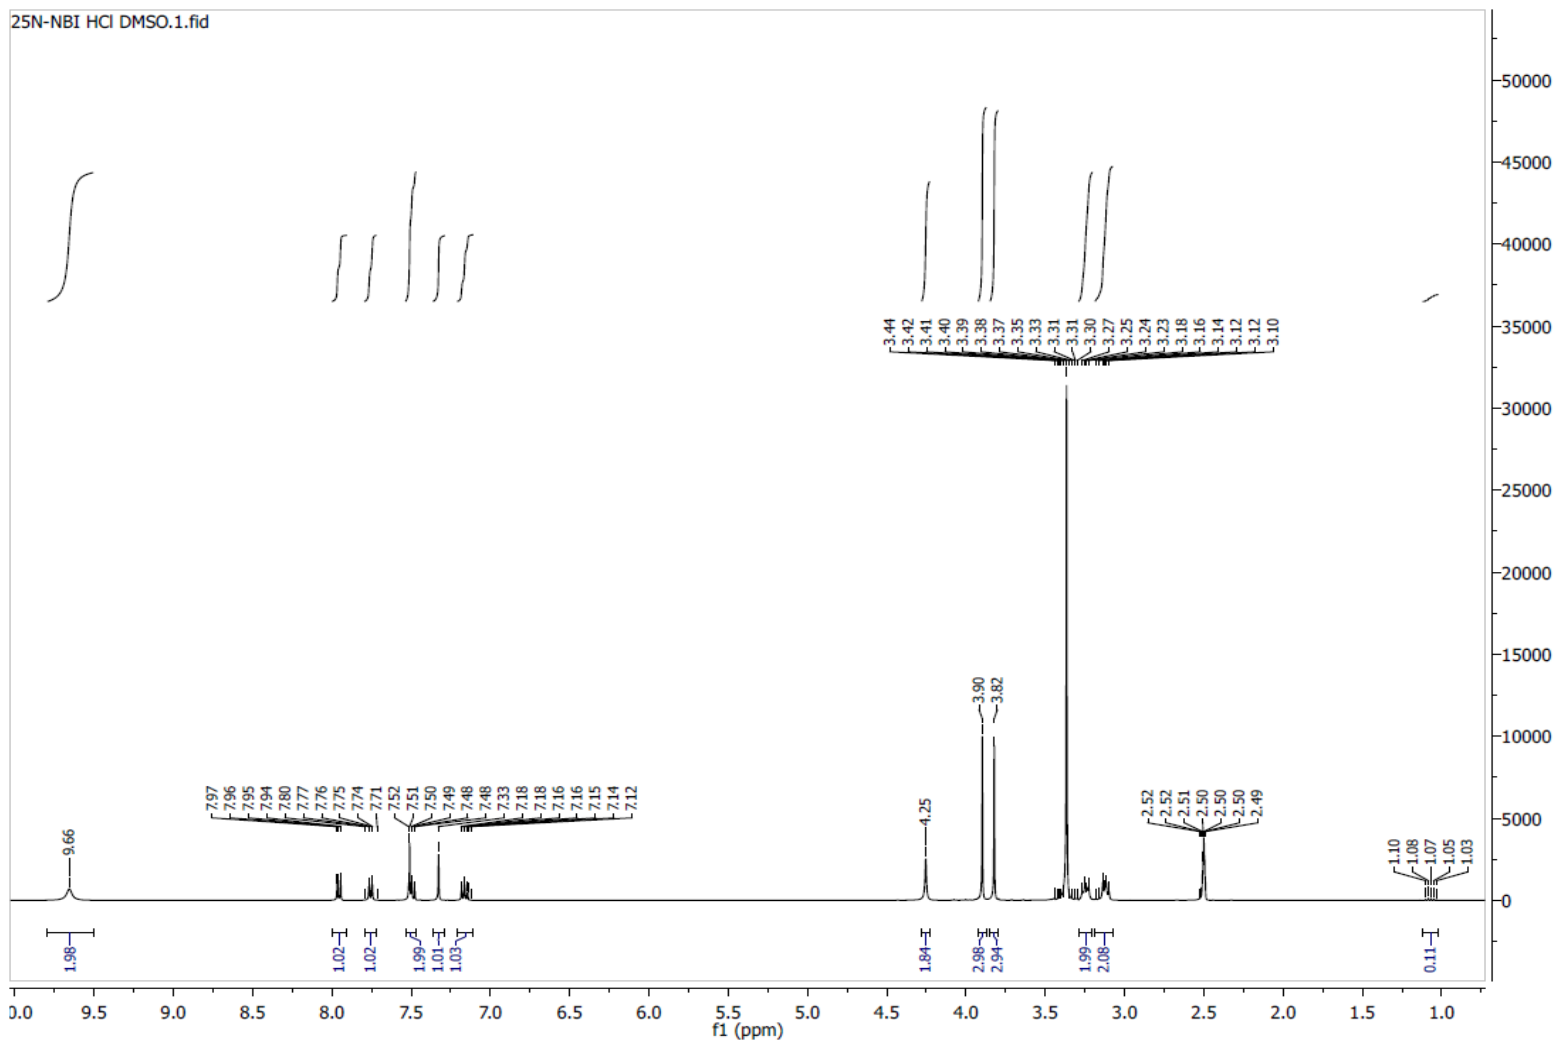

# Spectra 10. <sup>1</sup>H NMR of 25N-NBOCF<sub>2</sub>H (11) HCl

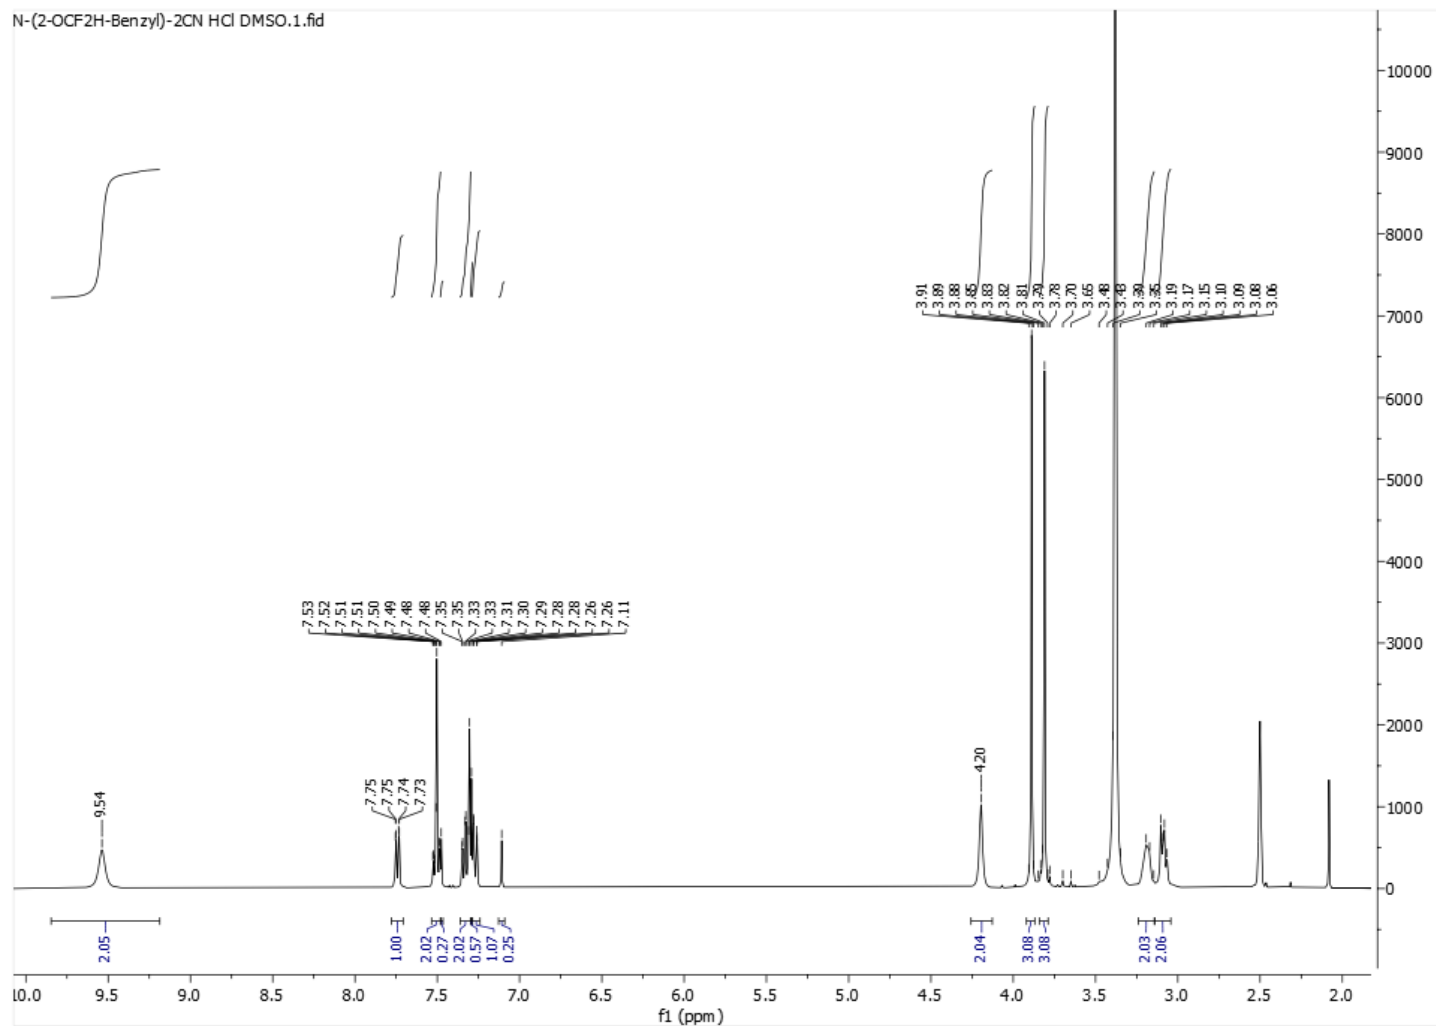

# Spectra 11. <sup>1</sup>H NMR of 25N-NBOCF<sub>3</sub> (12) HCl

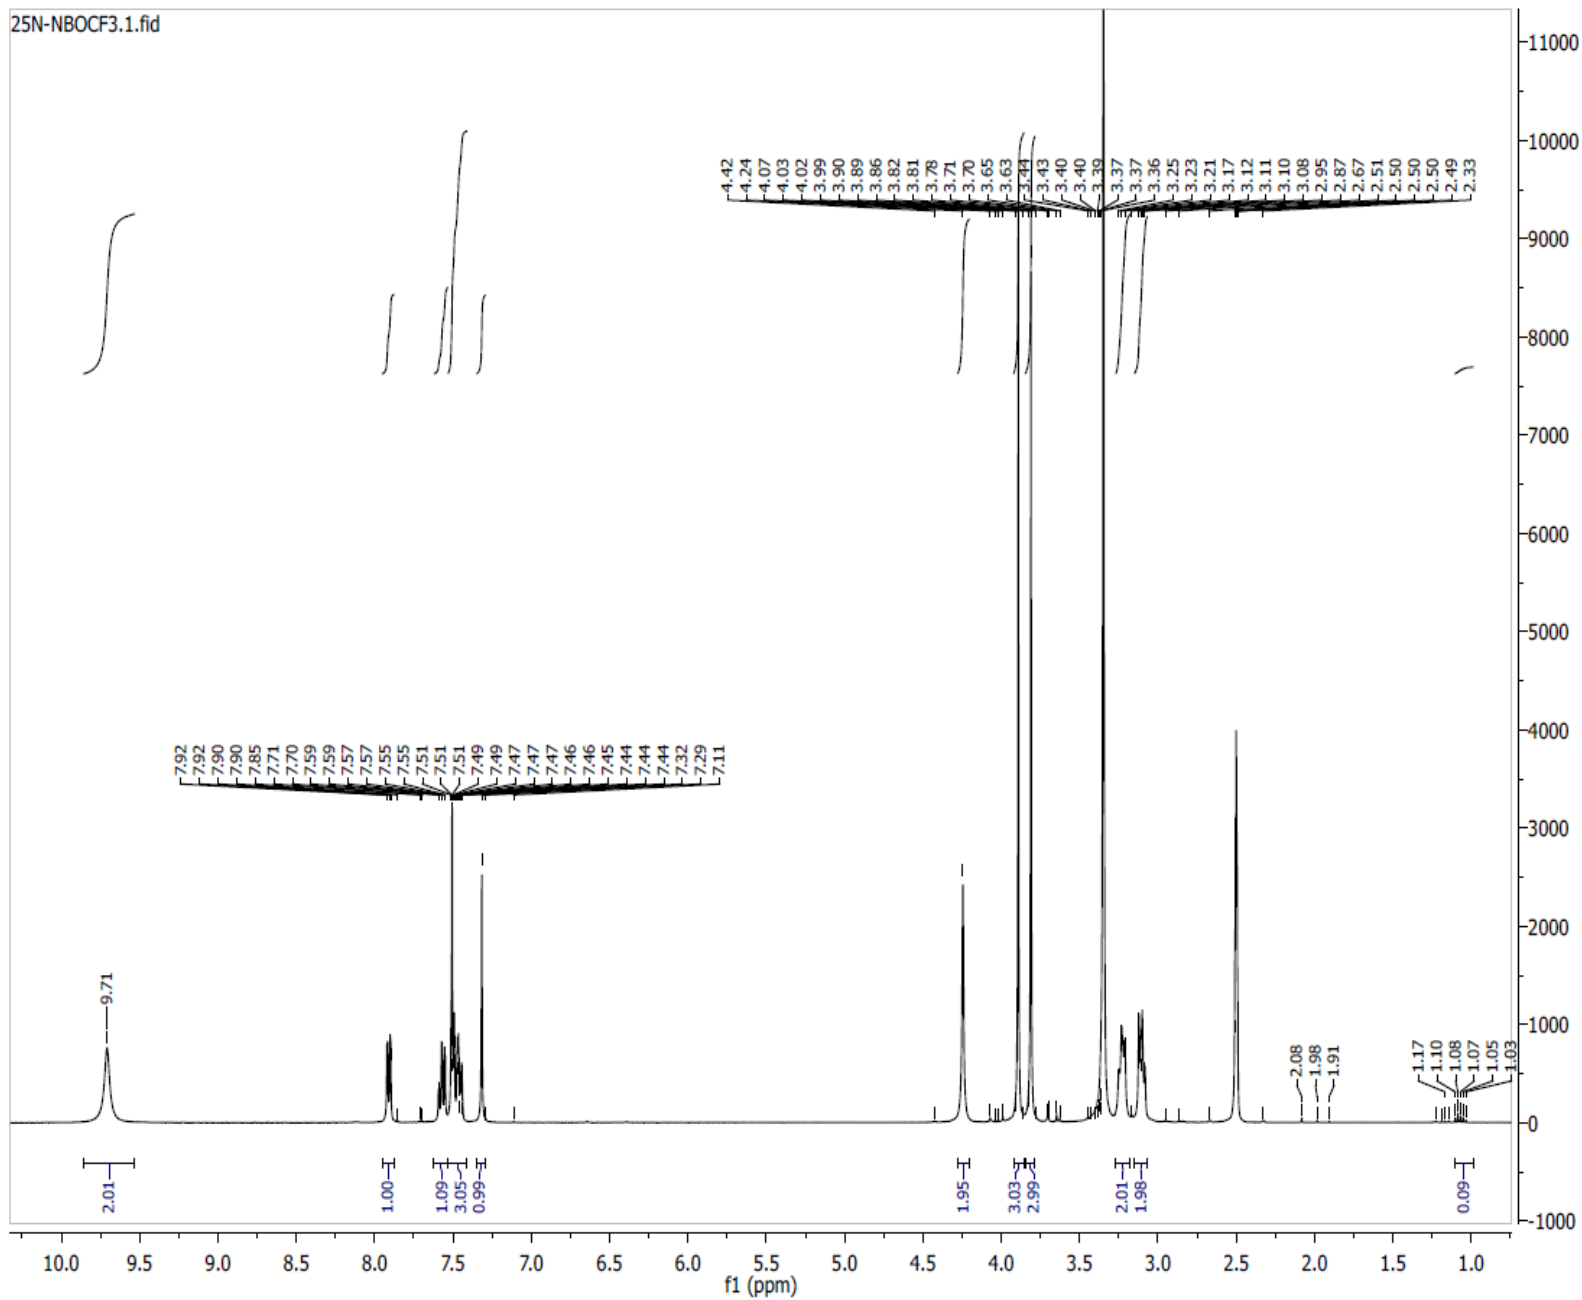

# Spectra 12. <sup>1</sup>H NMR of 25N-NBMDf<sub>2</sub> (13) HCl

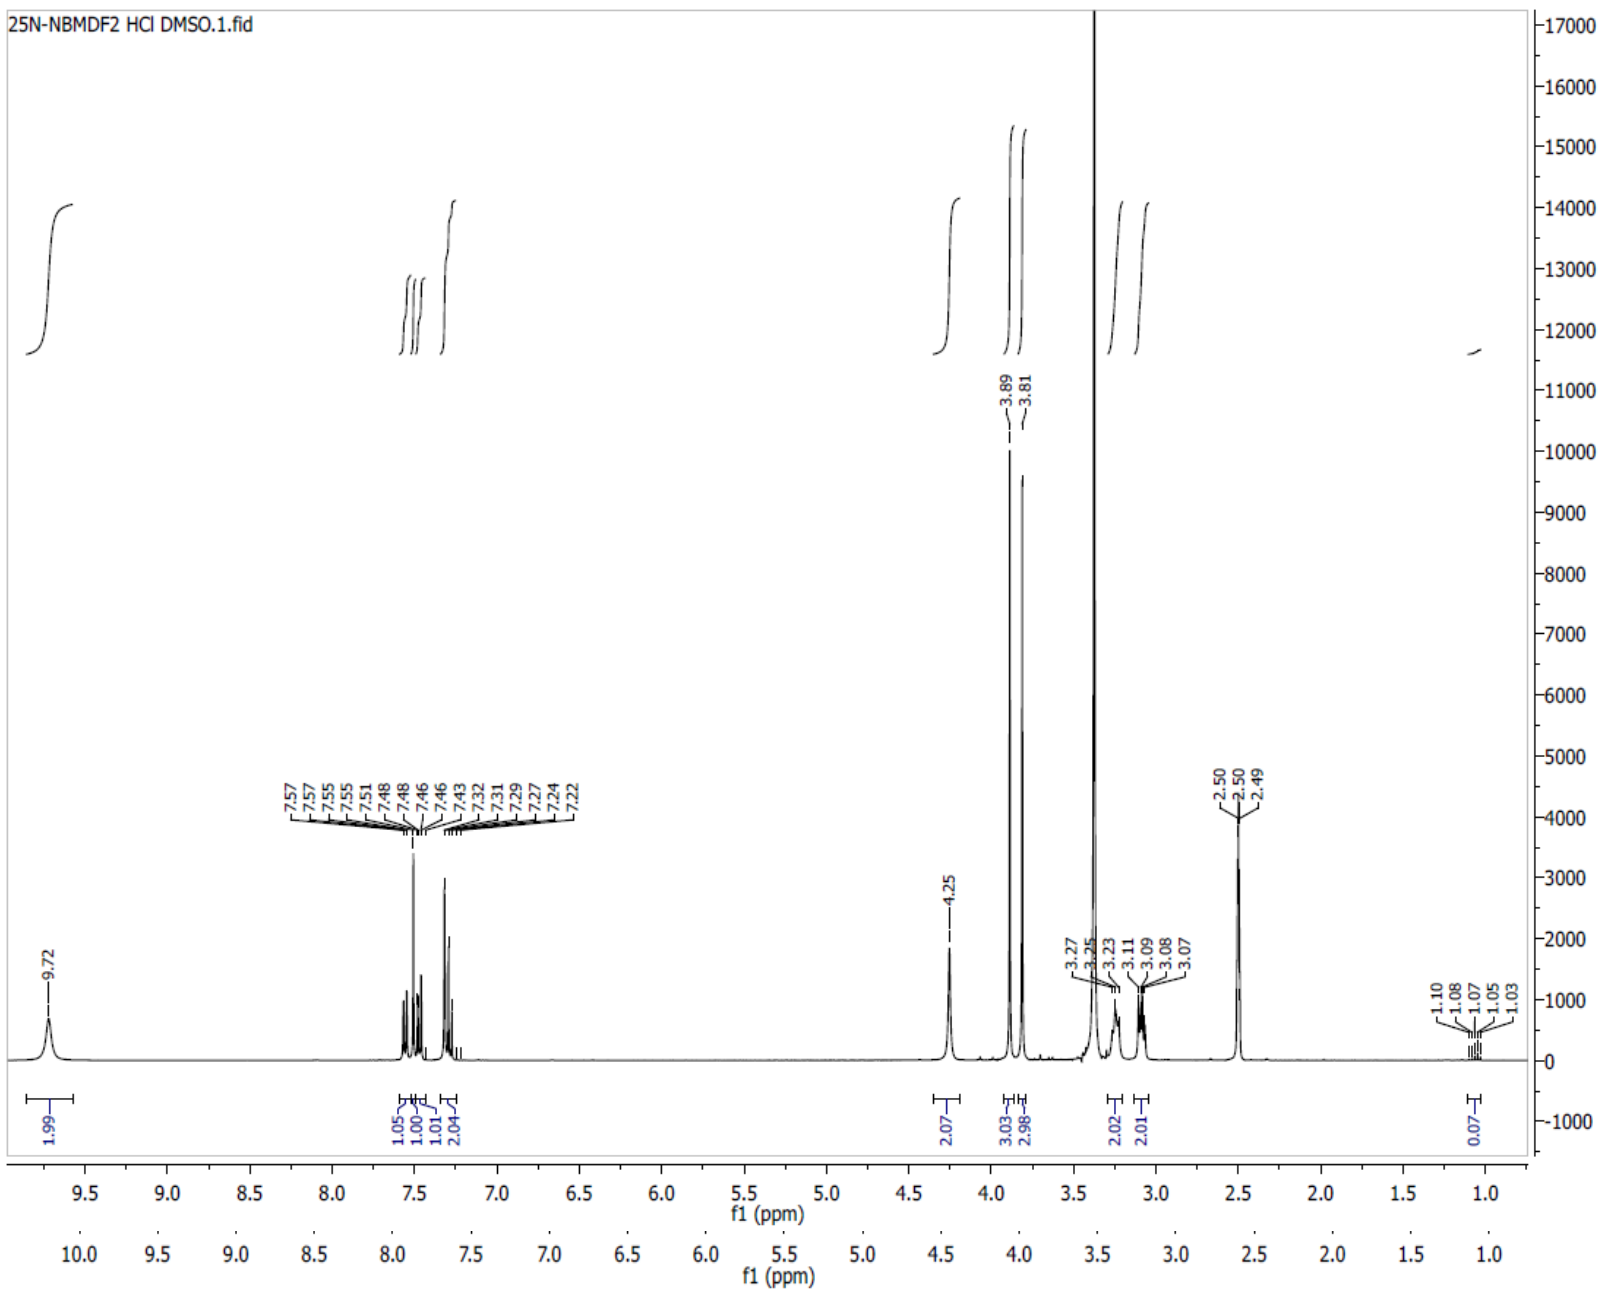

# Spectra 13. <sup>1</sup>H NMR of 25N-NBCF<sub>3</sub> (14) HCl

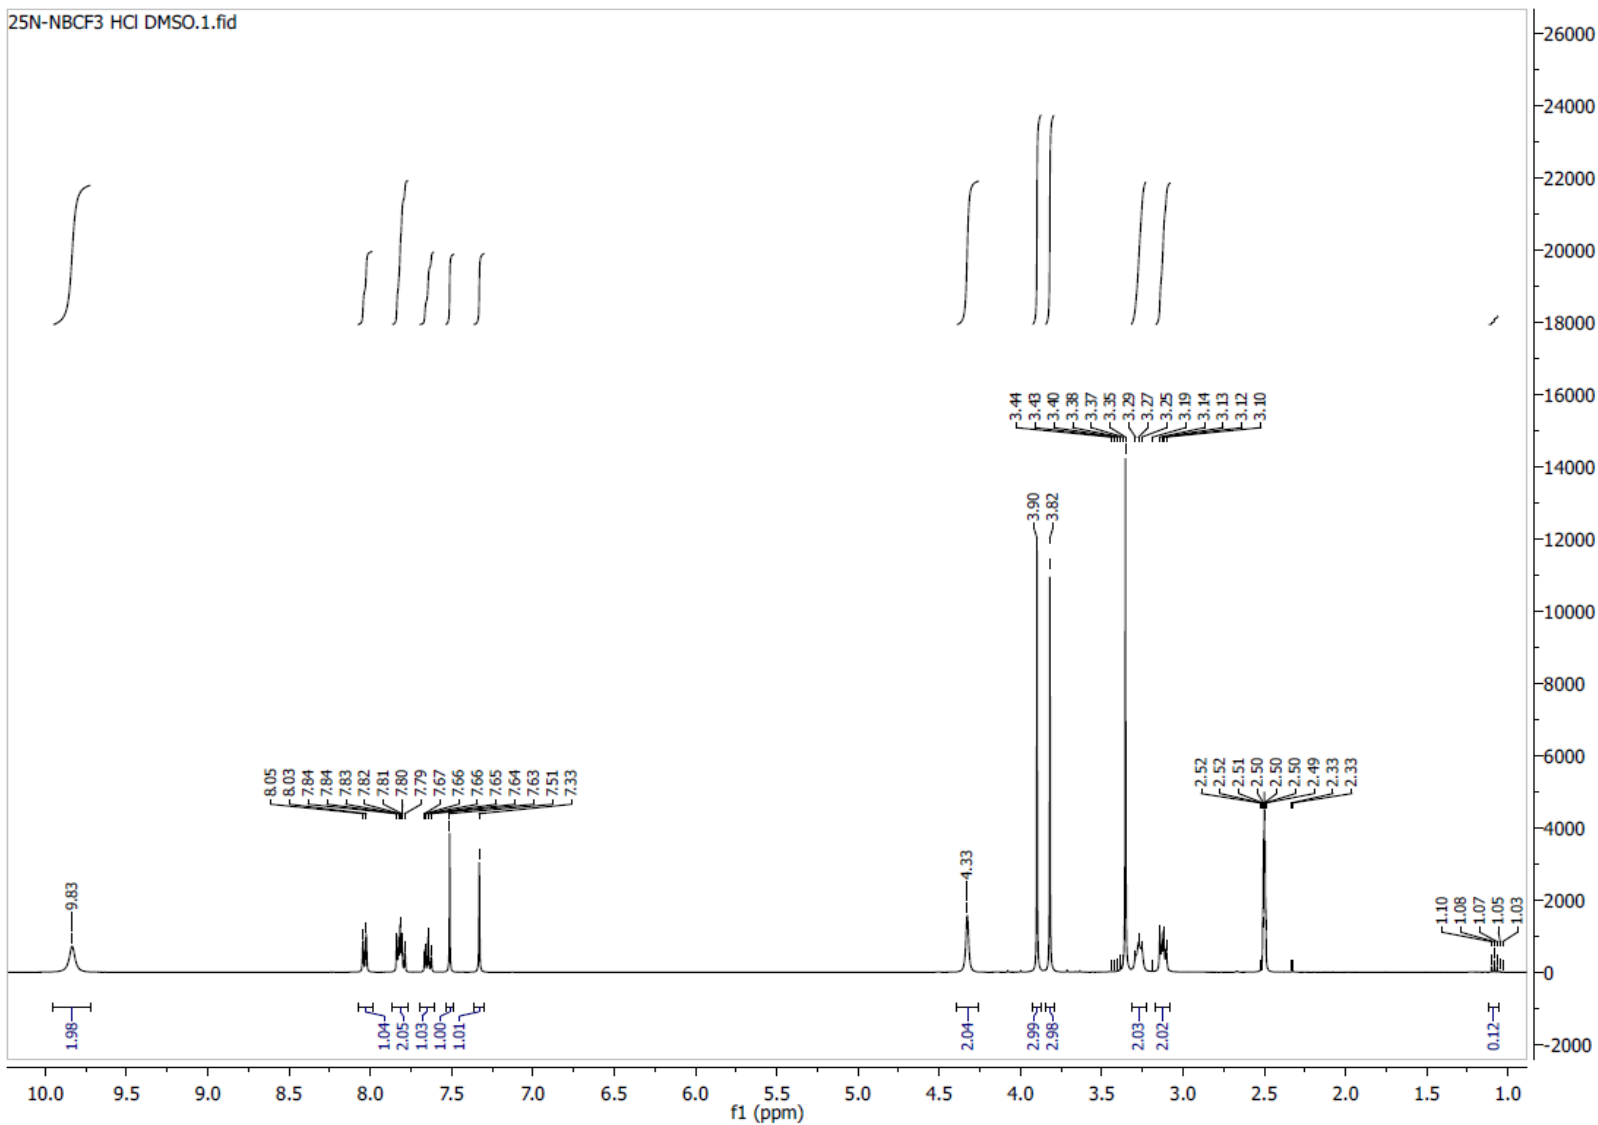

# Spectra 14. <sup>1</sup>H NMR of 25N-NBNO<sub>2</sub> (15) HCl

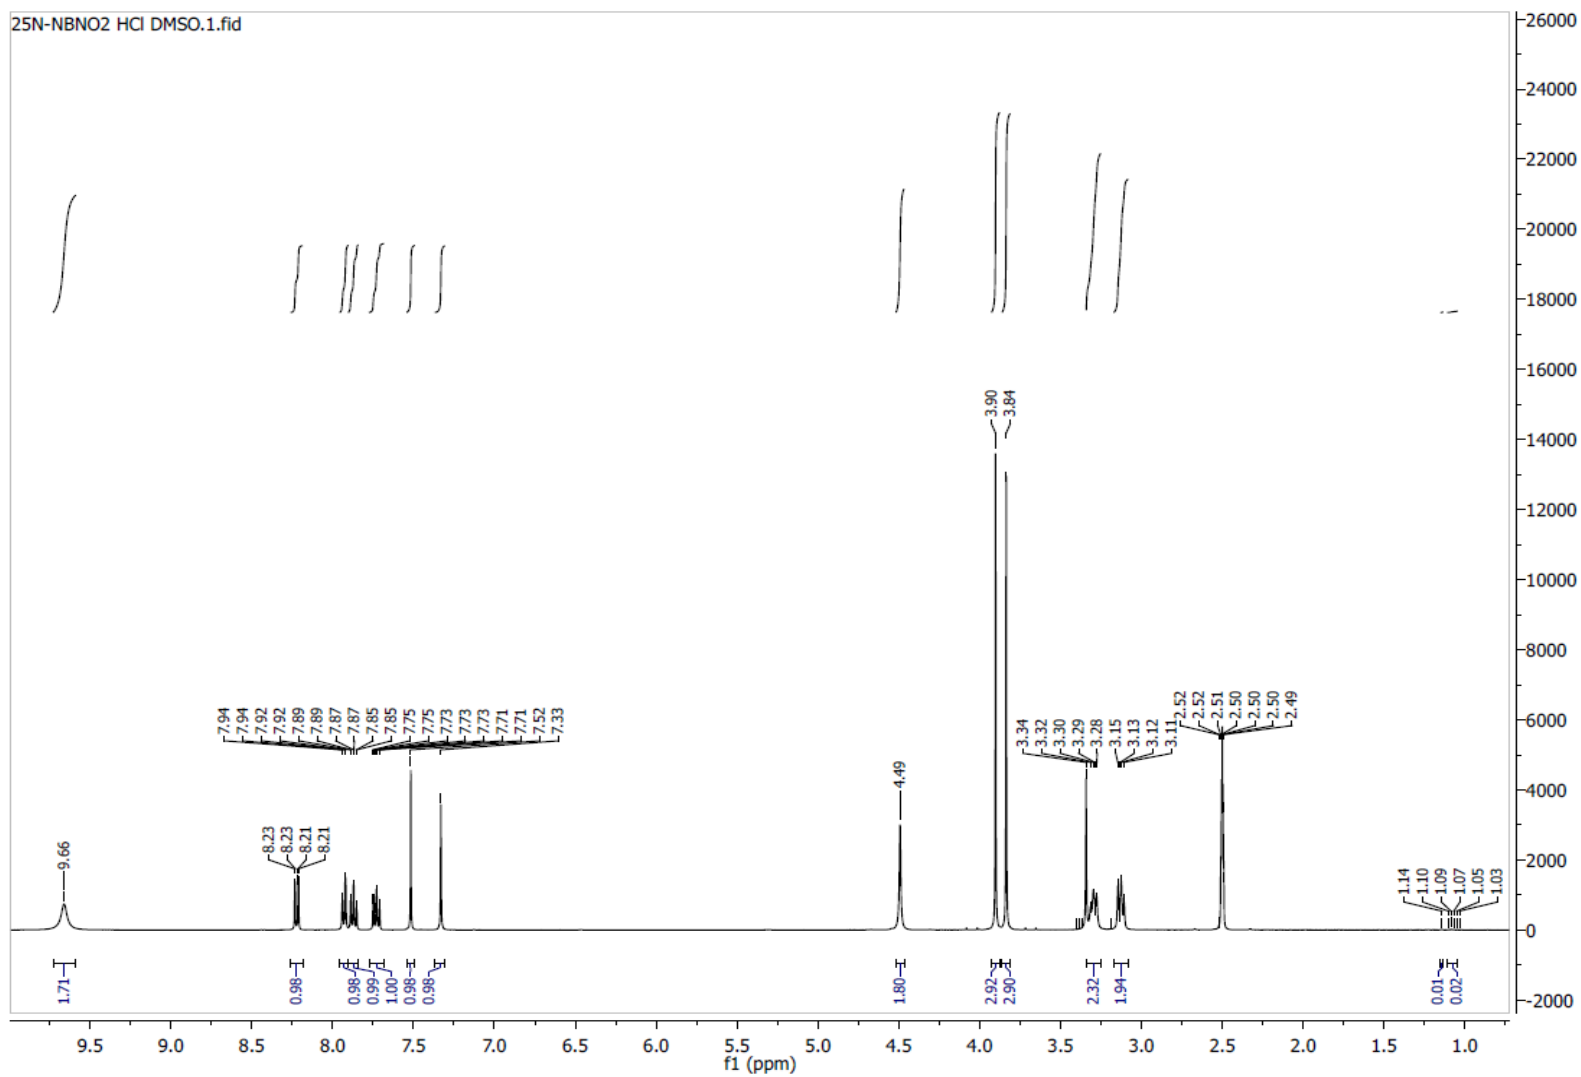

# Spectra 15. <sup>1</sup>H NMR of 25N-N1-Nap (16) HCl

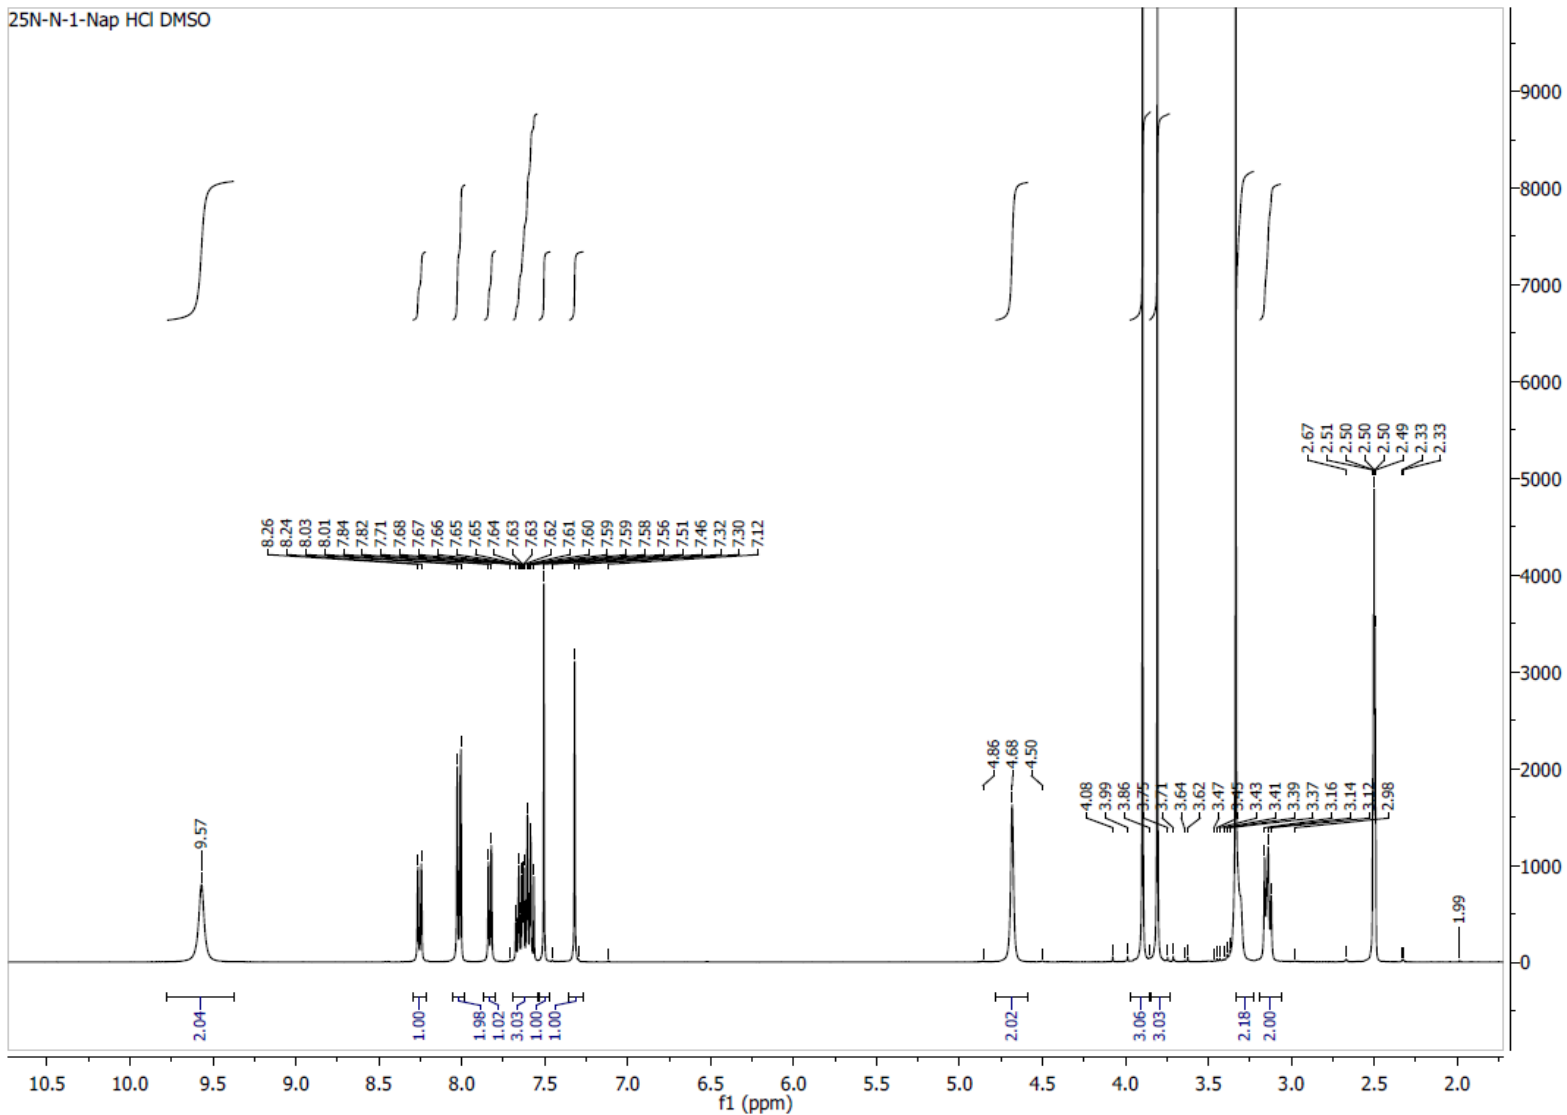

Spectra 16. <sup>1</sup>H NMR of 25N-NBPh (17) HCl

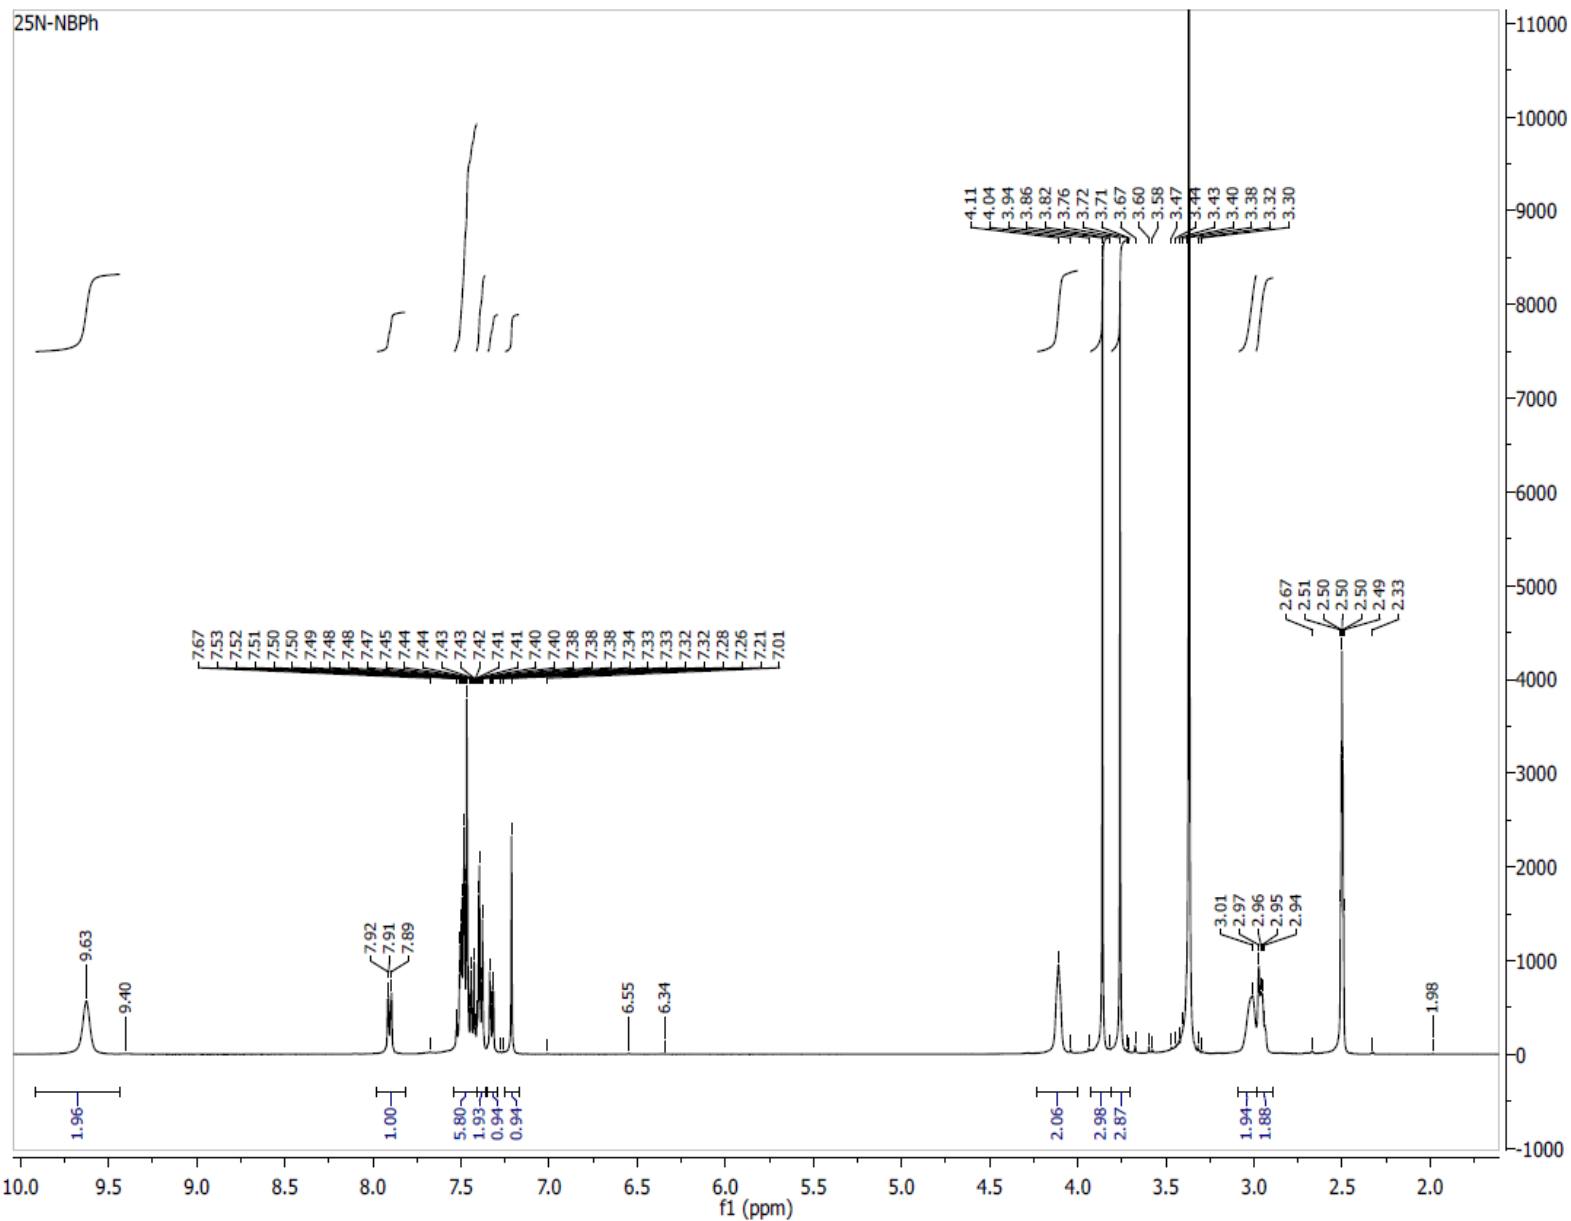



# Spectra 17. <sup>1</sup>H NMR of 25N-NB-2-OH-3-Me (18) HCl

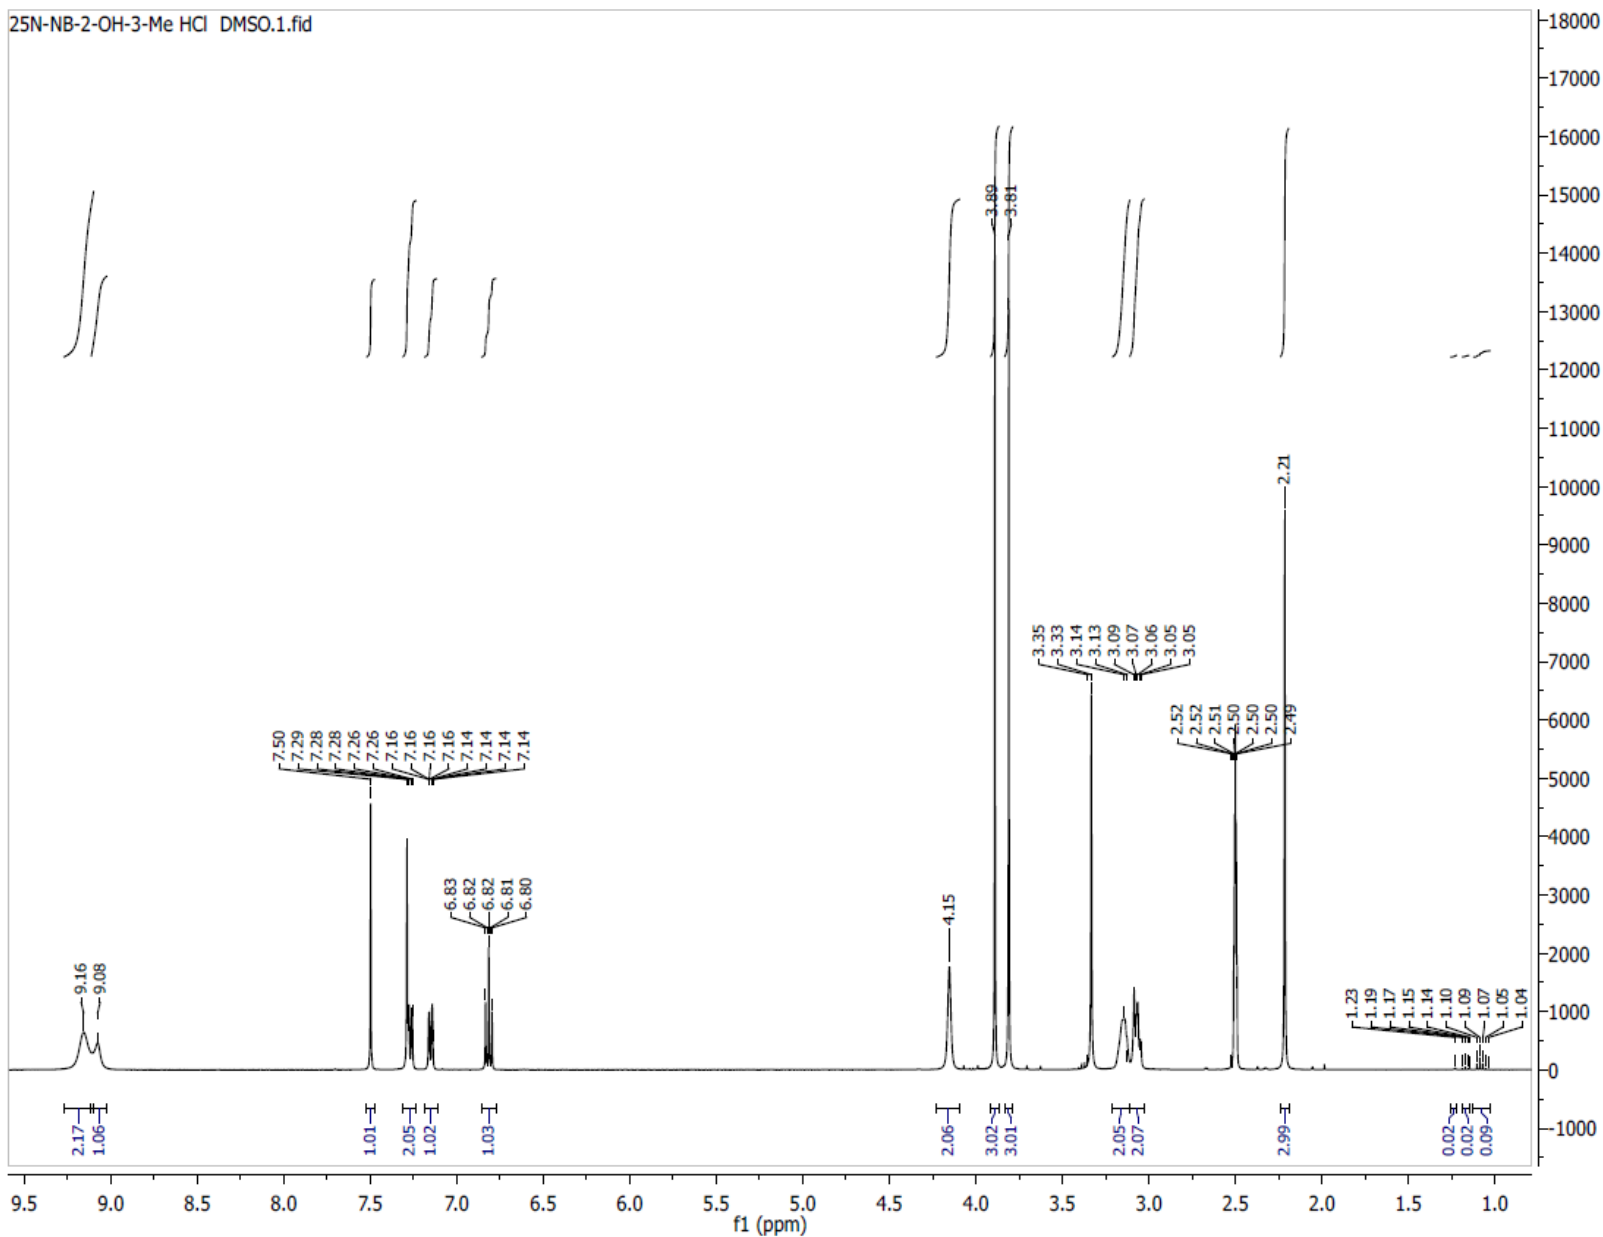

# Spectra 18. <sup>1</sup>H NMR of 25N-NB-2-MeO-3-F (19) HCl

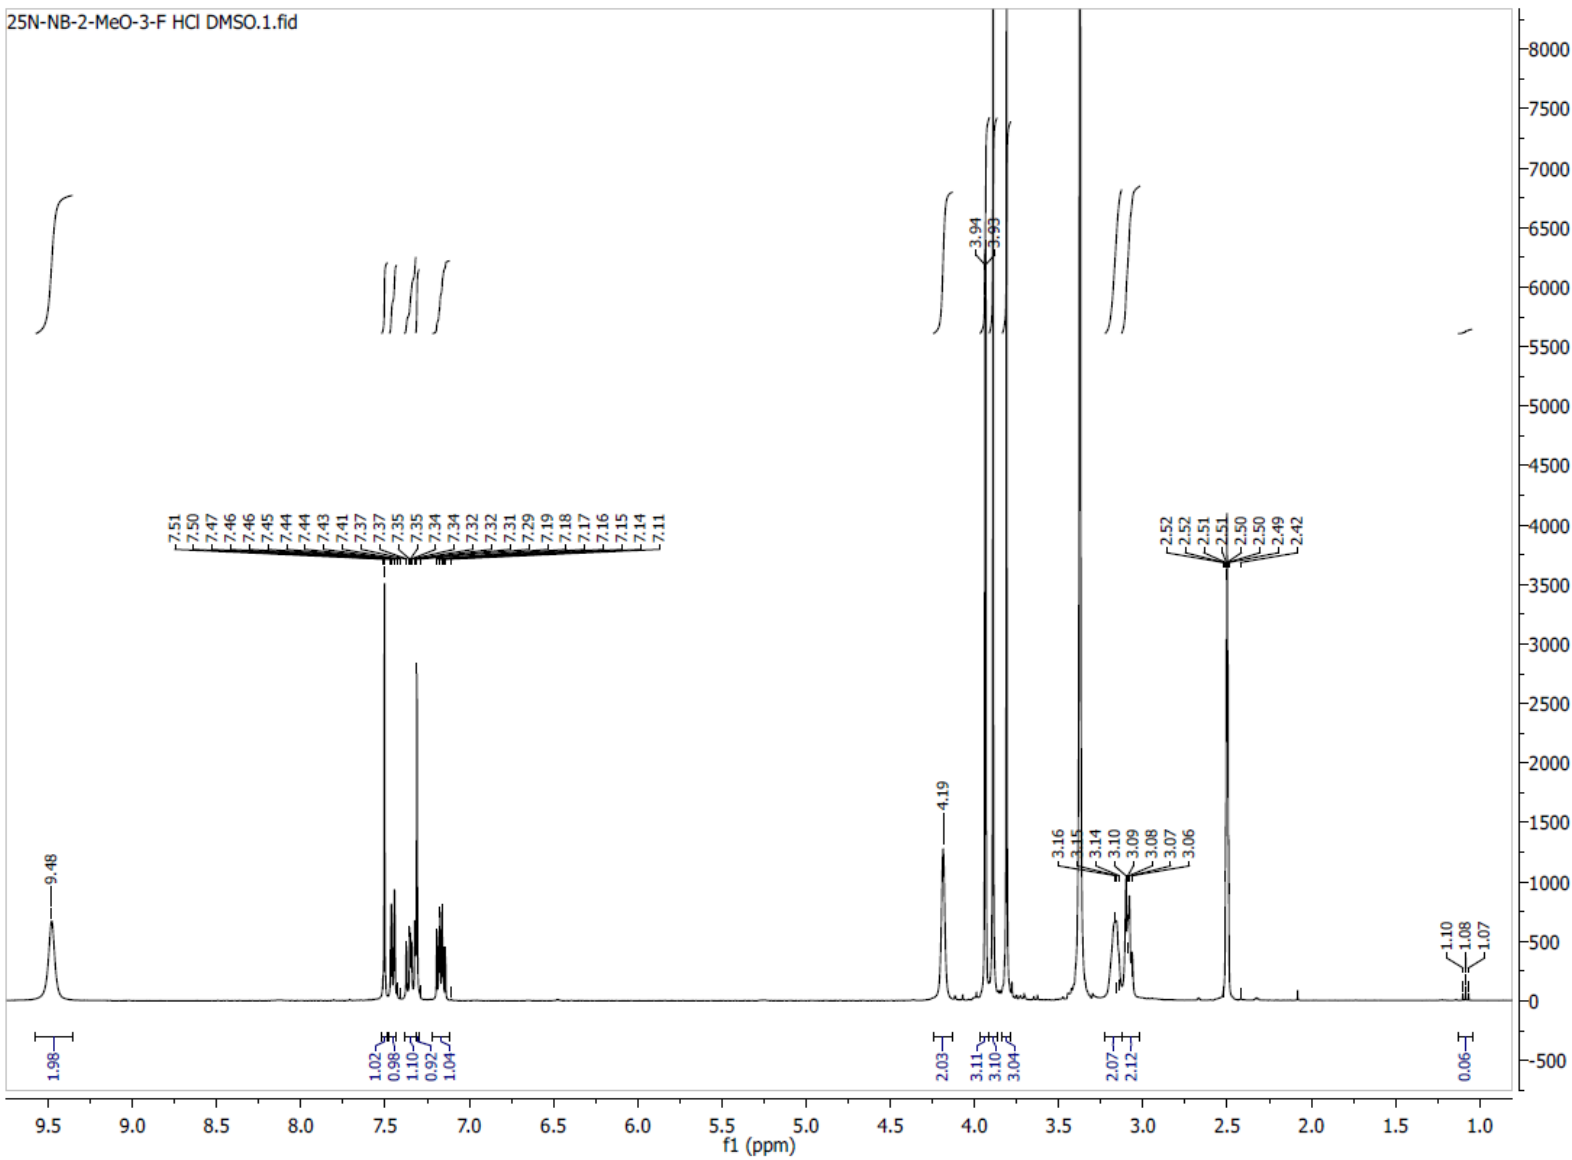

# Spectra 19. <sup>1</sup>H NMR of 25N-NB-2,5-DiMeO (20) HCl

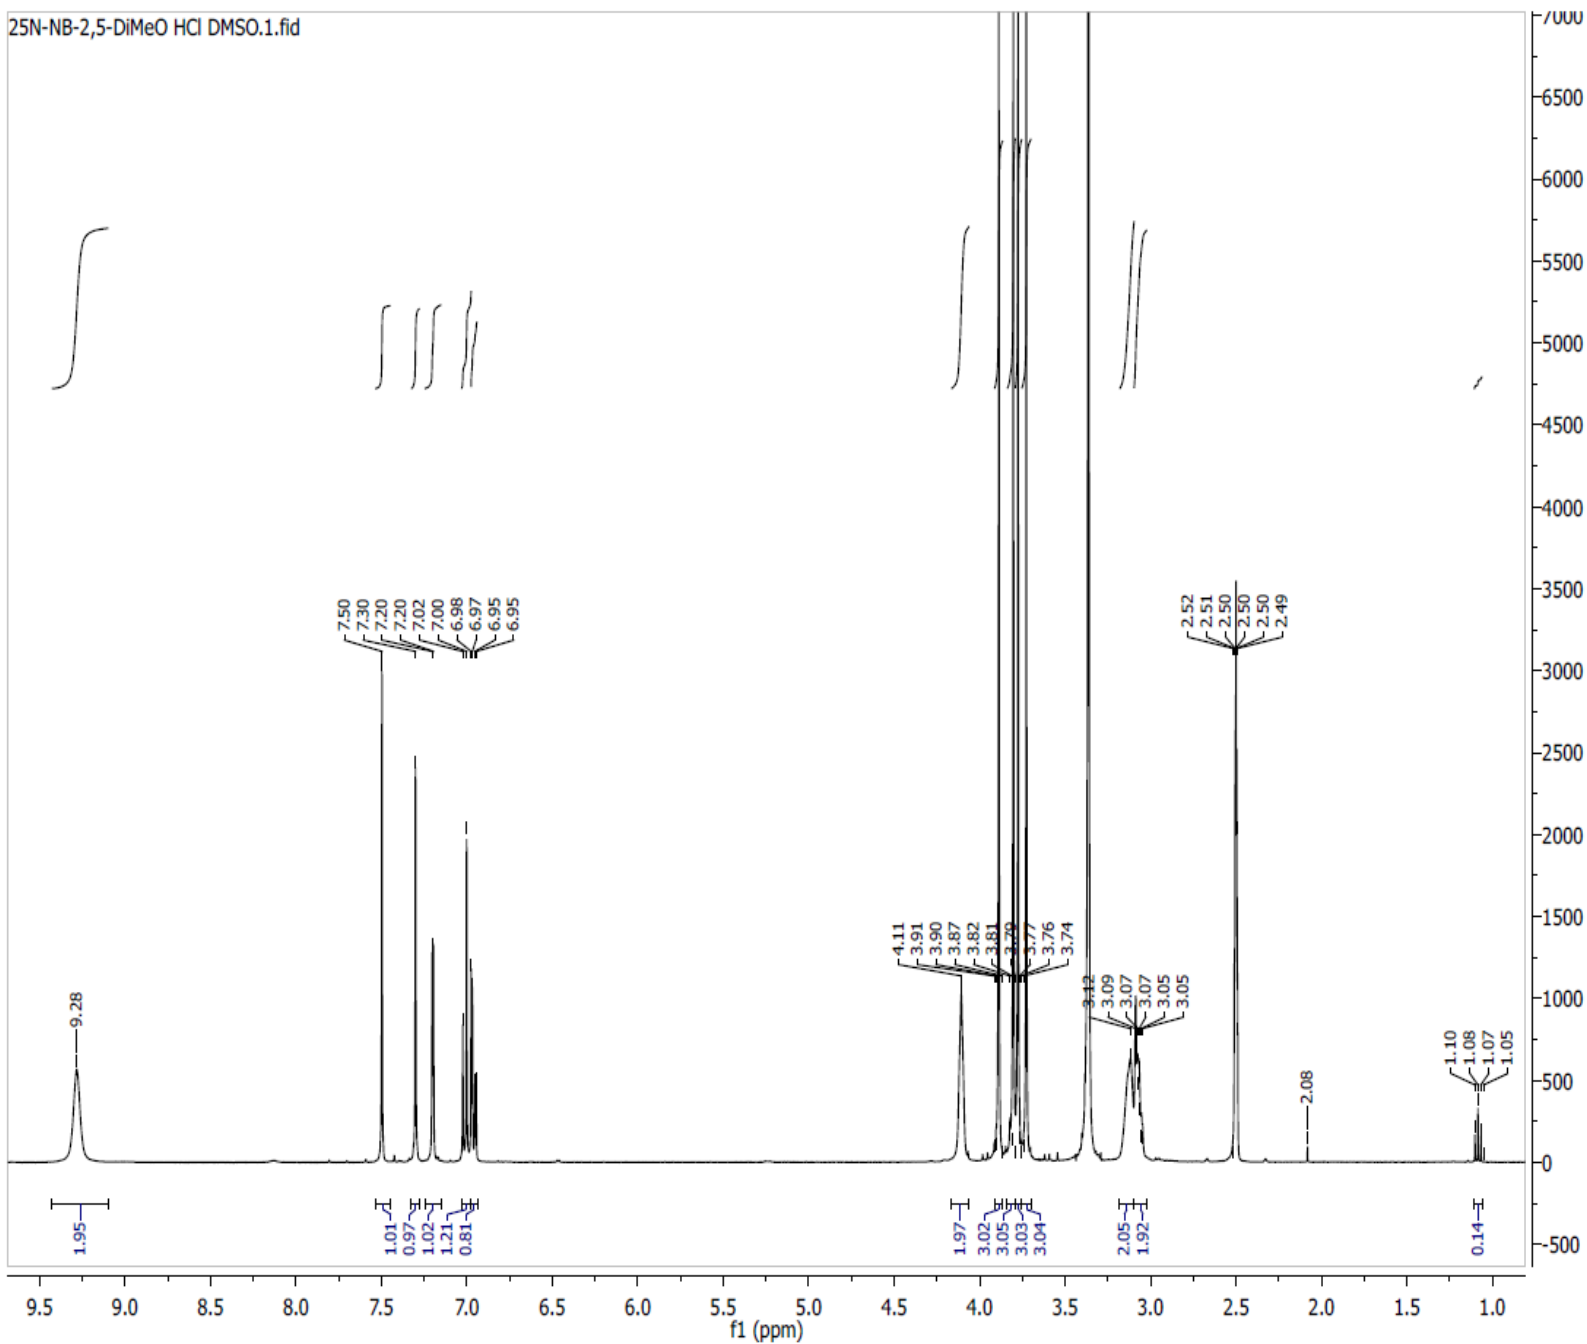

# Spectra 20. <sup>1</sup>H NMR of 25N-NB-3-OH (21) HCl

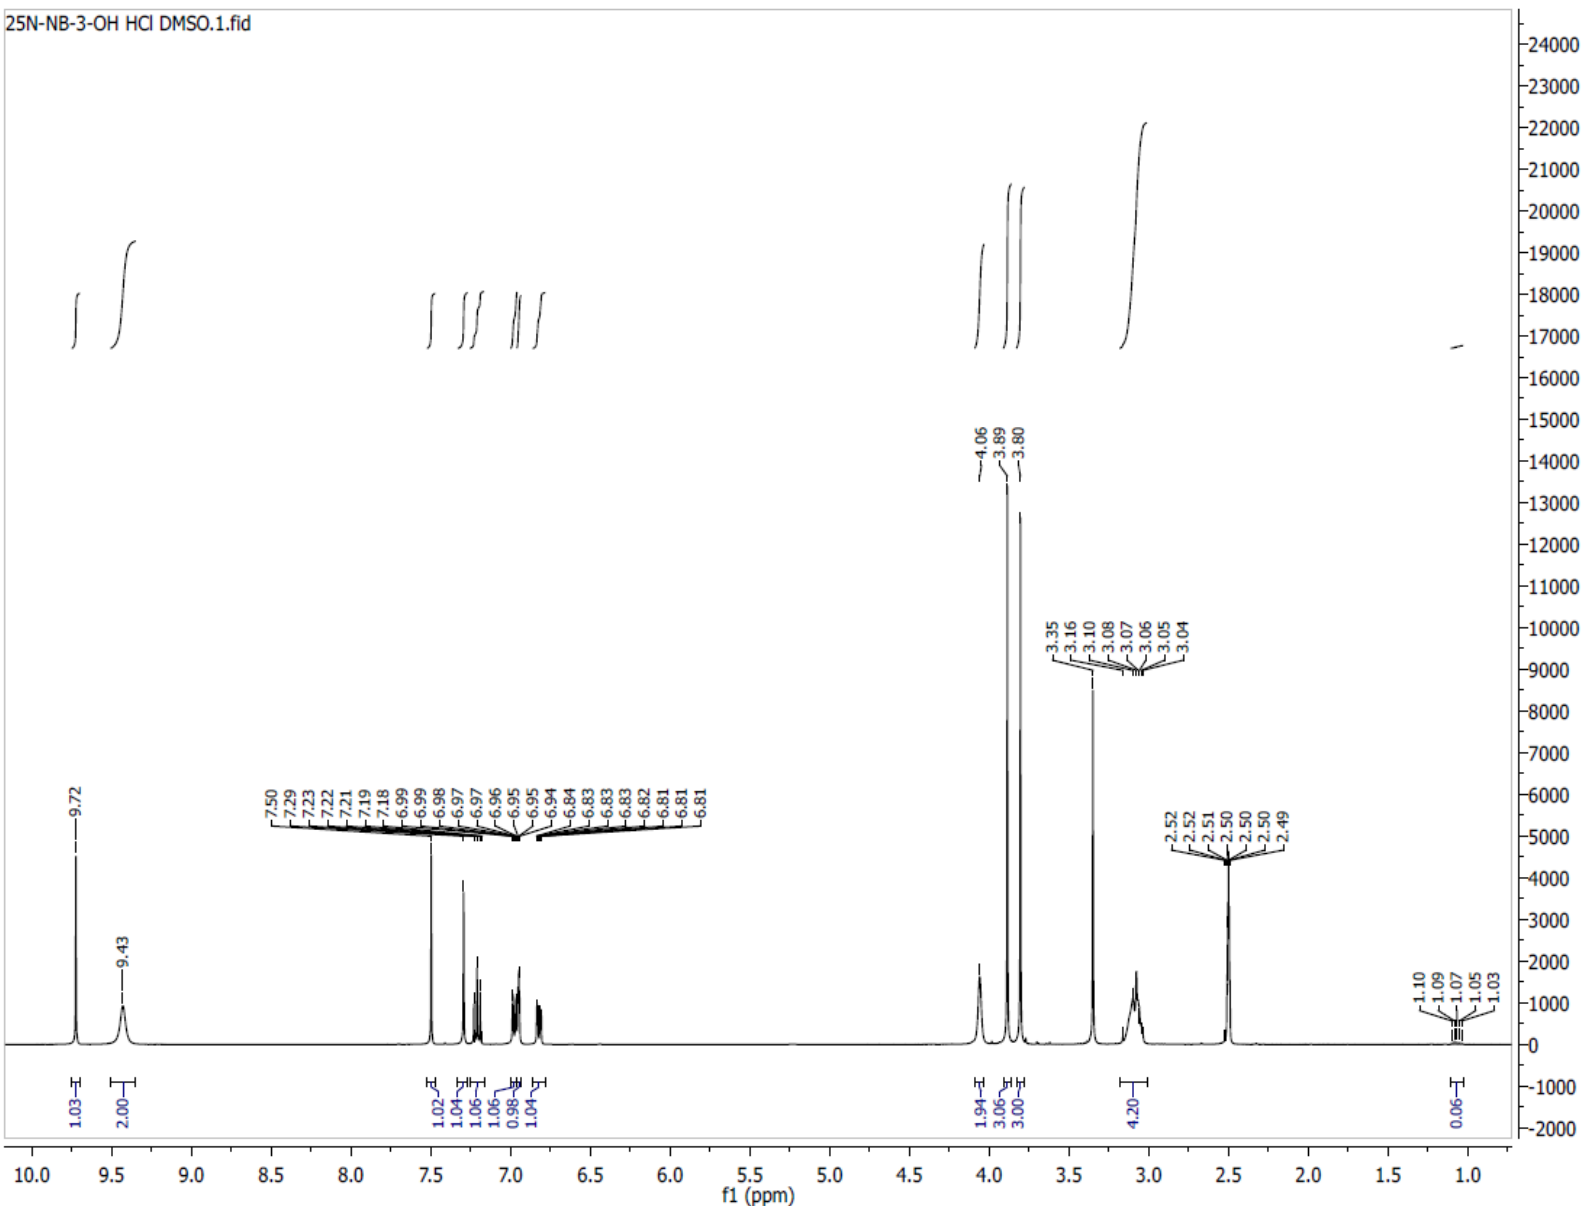

# Spectra 21. <sup>1</sup>H NMR of 25N-NB-3-Me (22) HCl

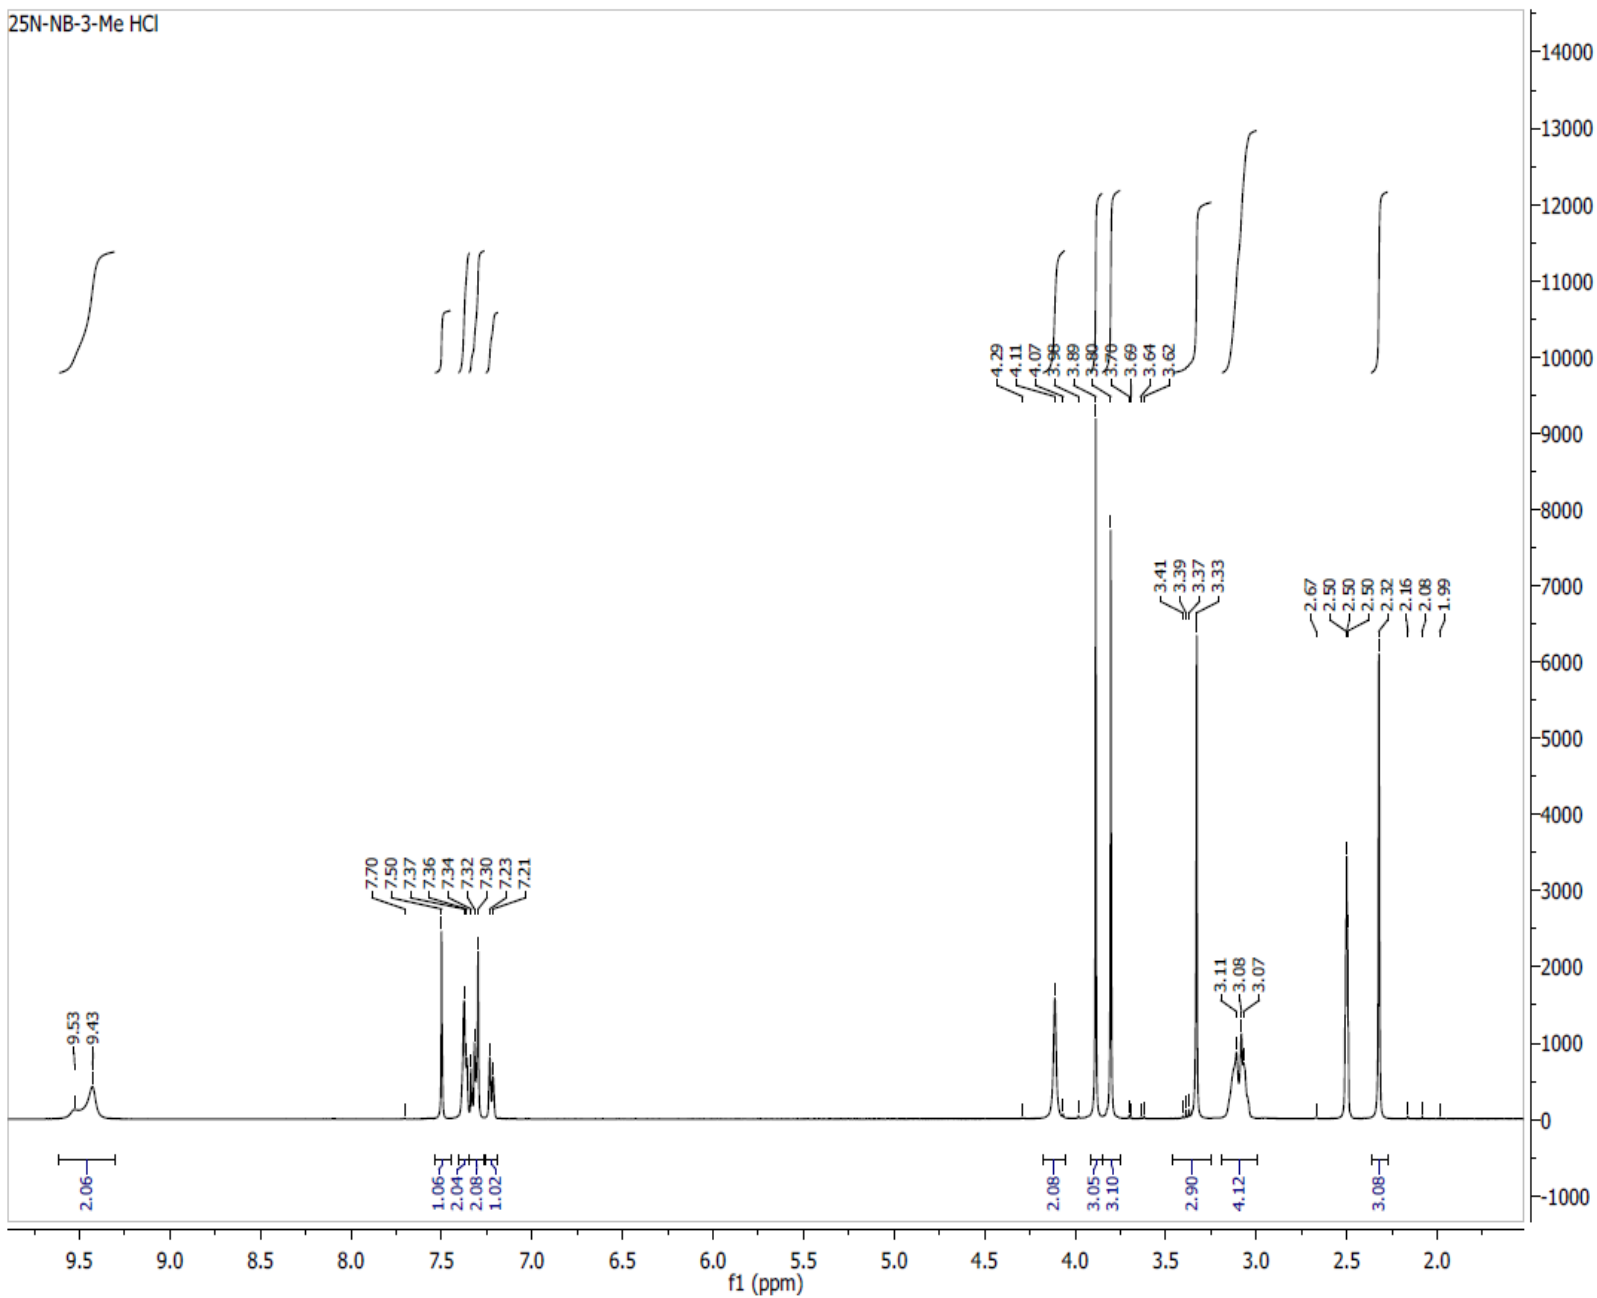

# Spectra 22. <sup>1</sup>H NMR of 25N-NB-4-Me (23) HCl

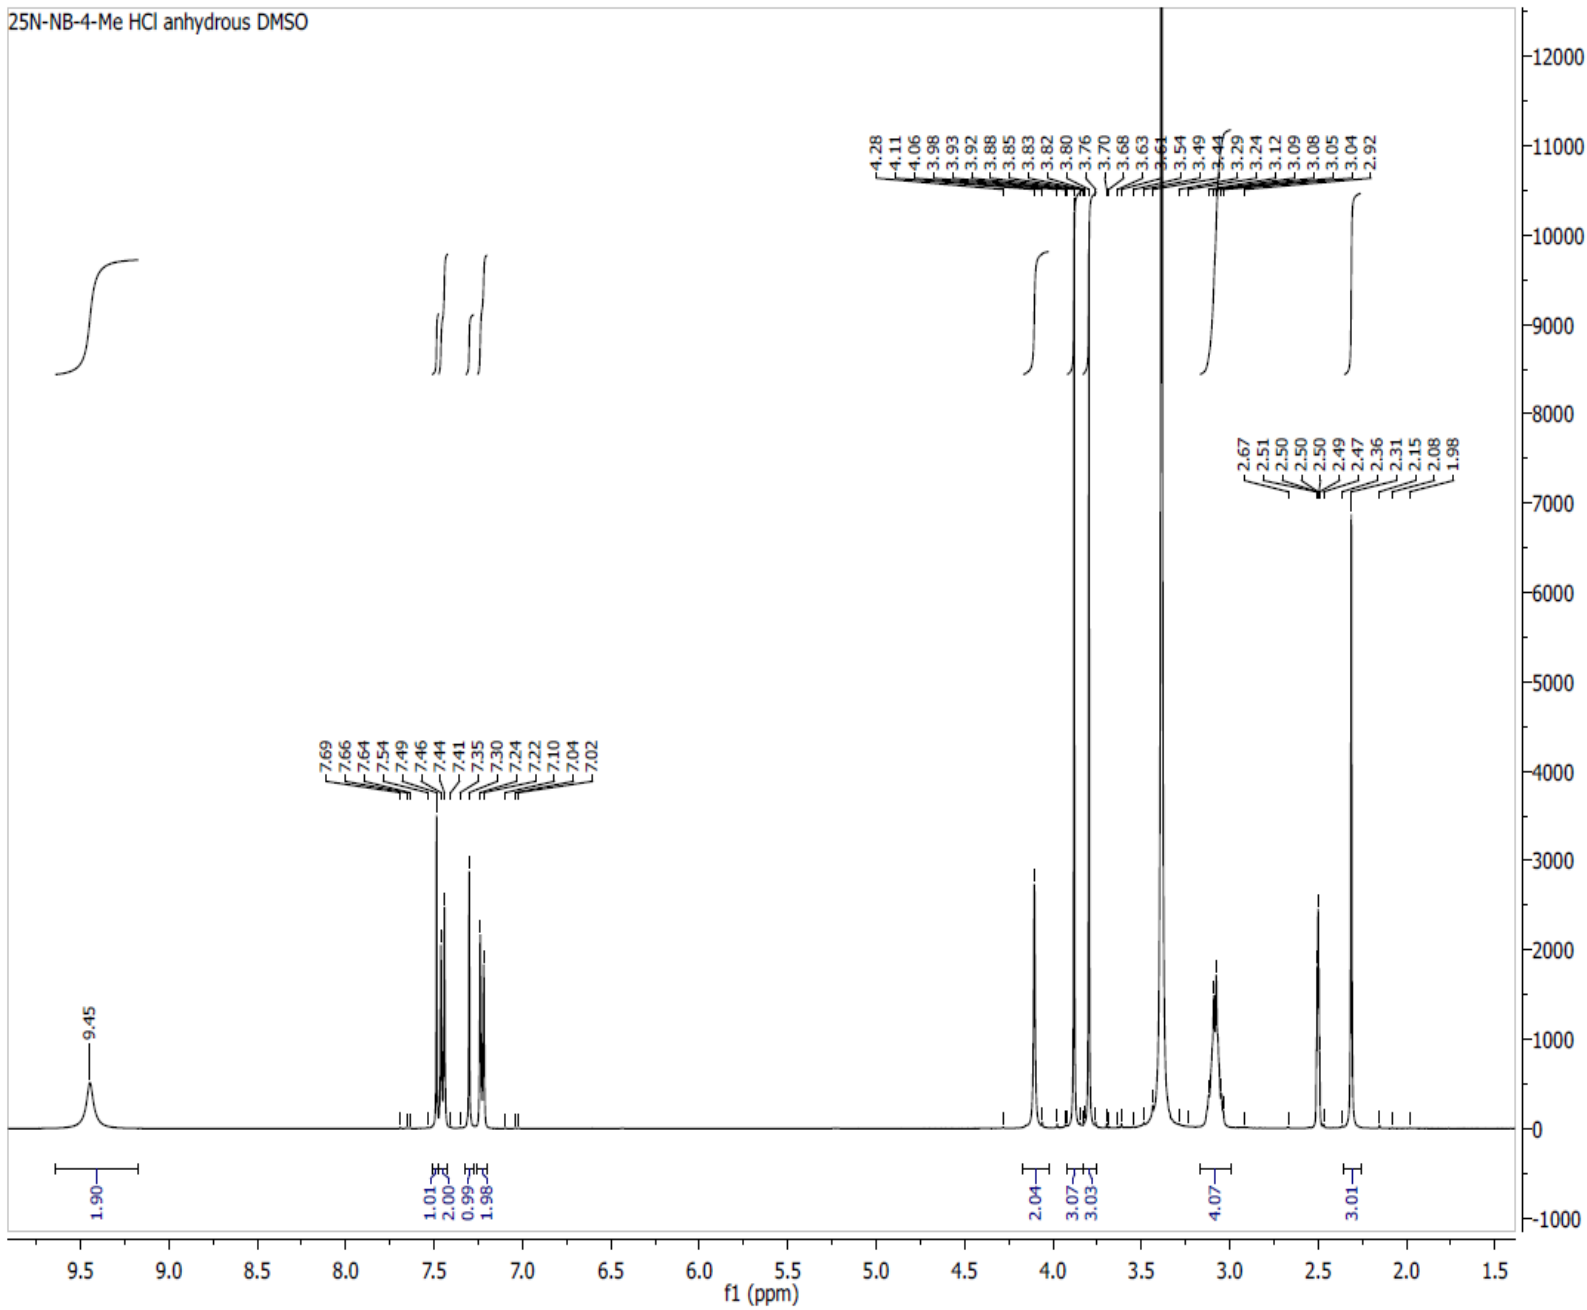

# Spectra 23. <sup>1</sup>H NMR of 25N-NB-3-F (24) HCl

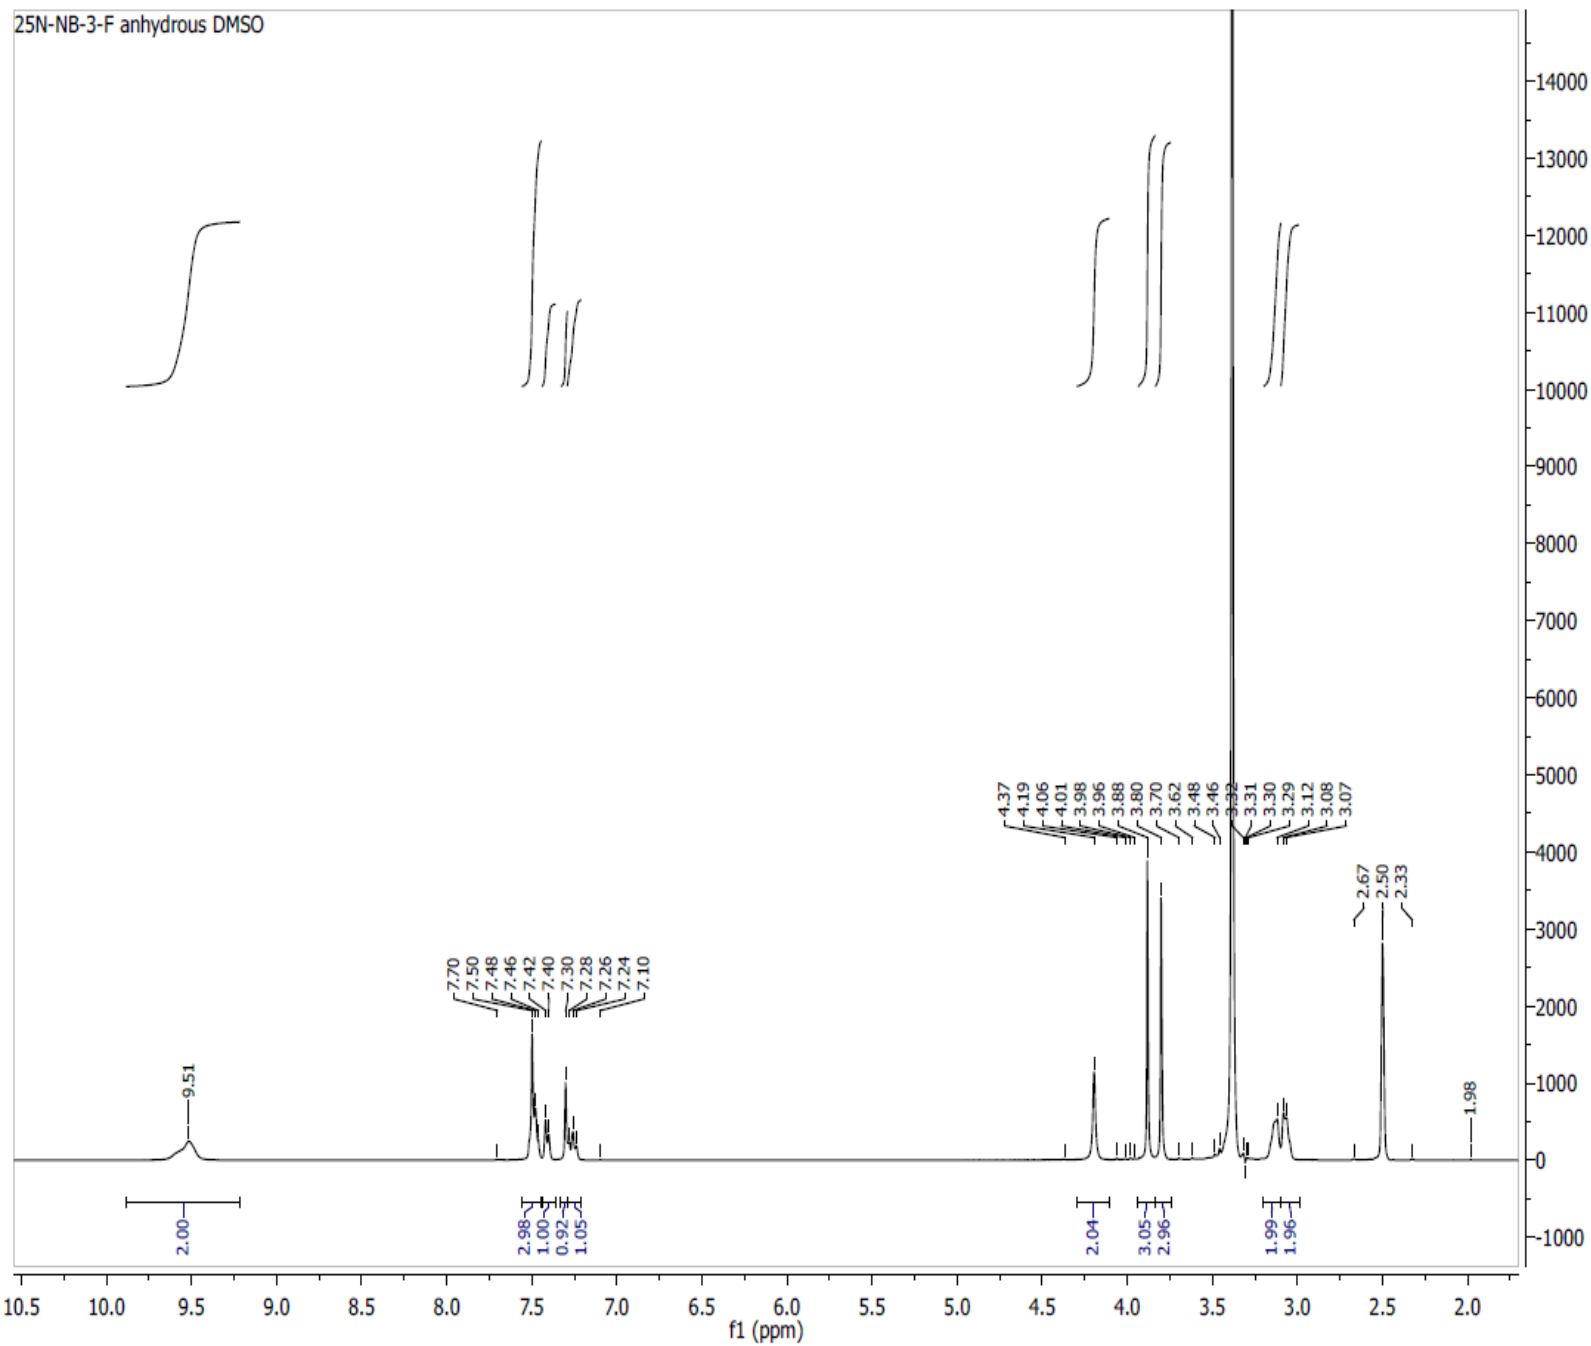

# Spectra 24. <sup>1</sup>H NMR of 25N-NB-4-F (25) HCl

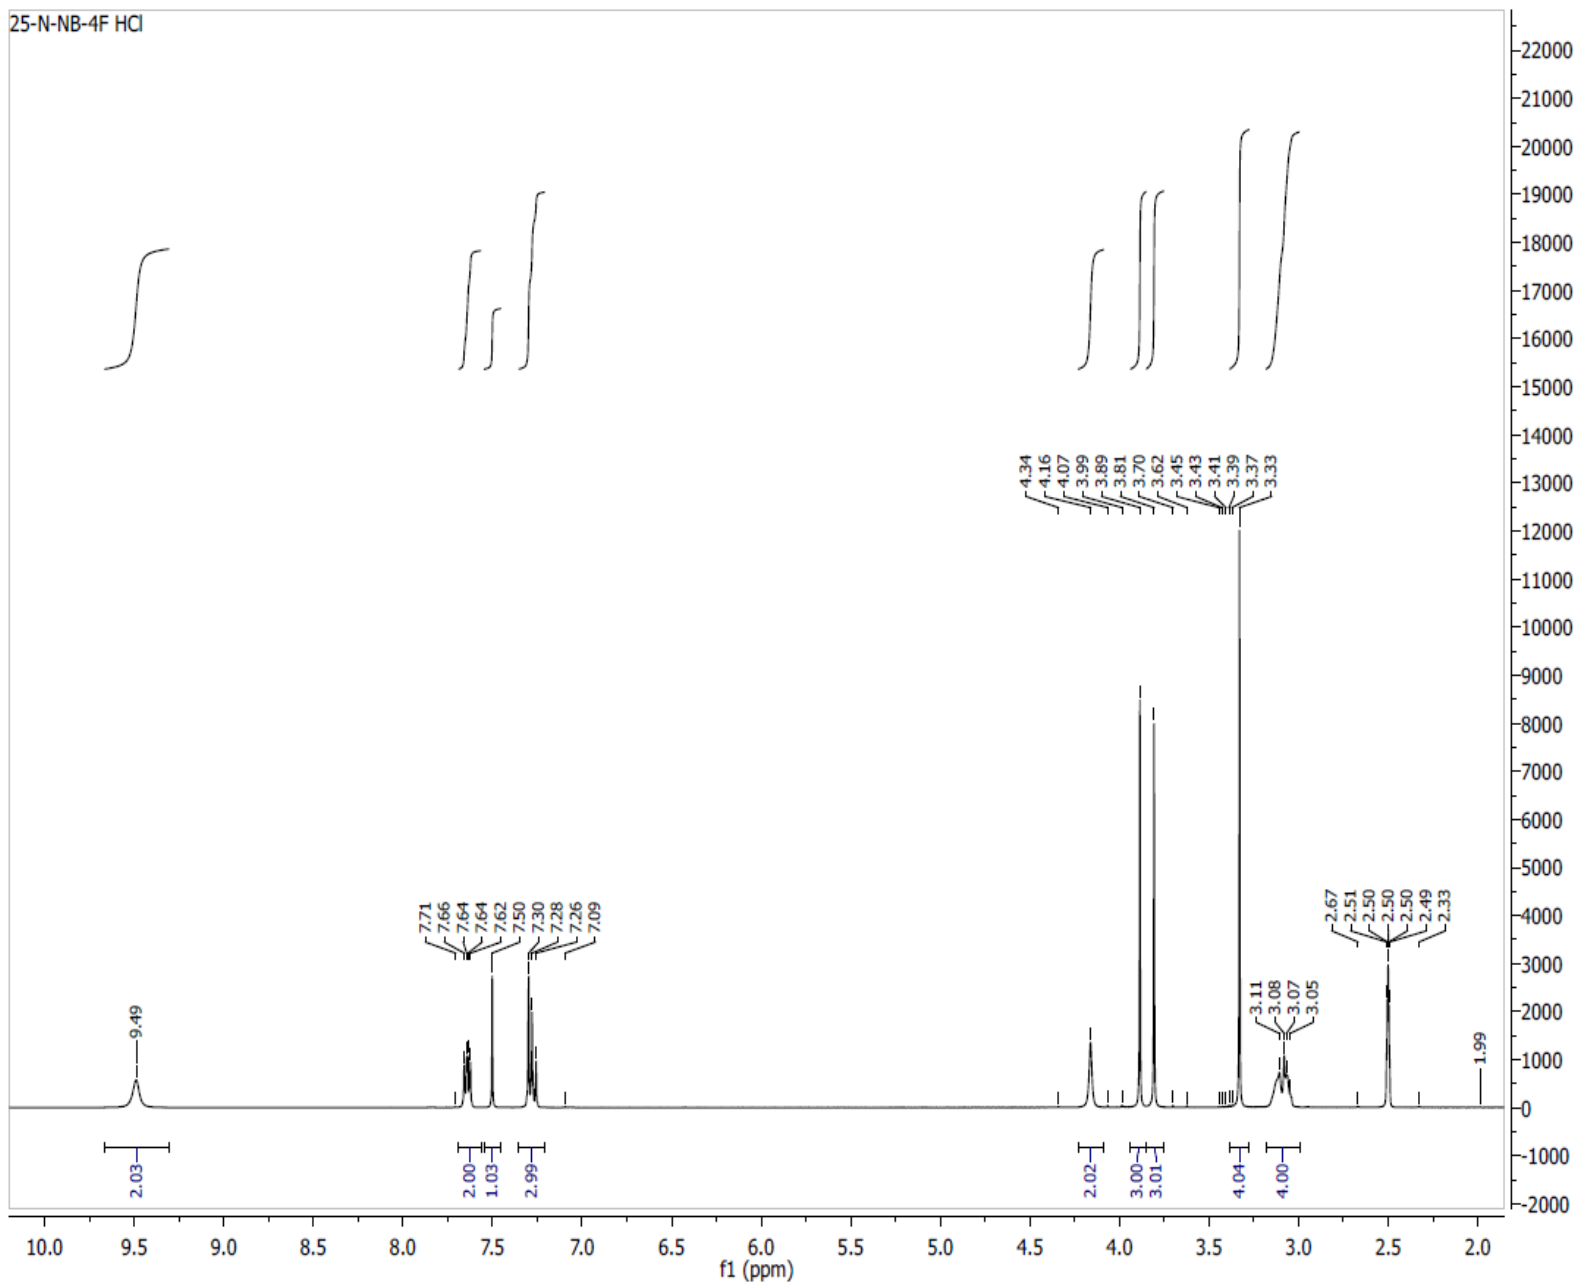



# Spectra 25. <sup>1</sup>H NMR of 25D-N1-Nap (26) HCl

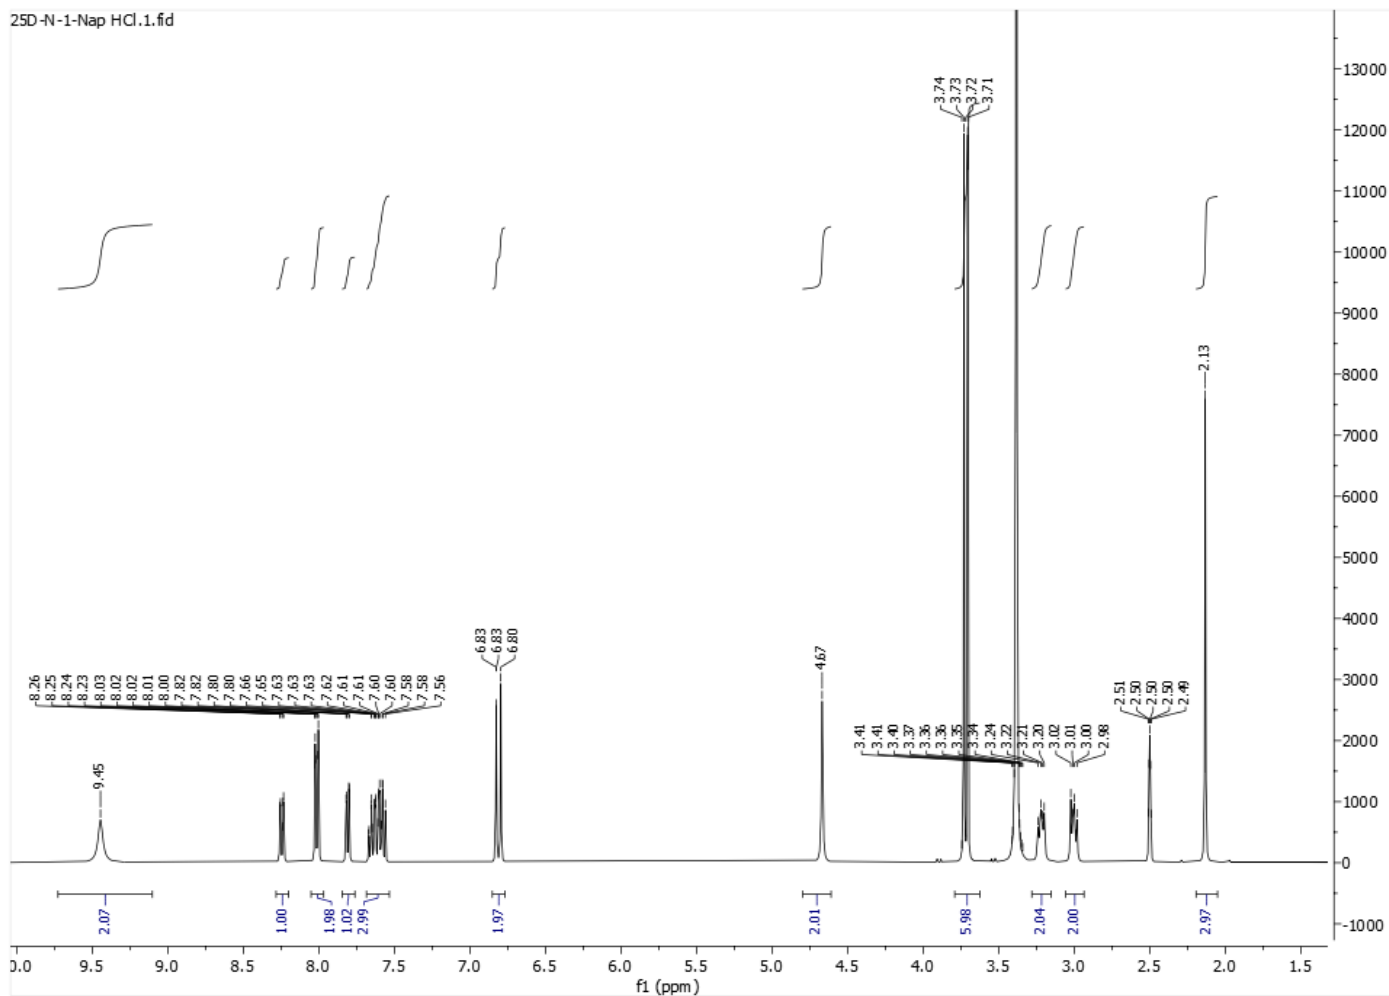

# Spectra 26. <sup>1</sup>H NMR of 25D-NBPh (27) HCl

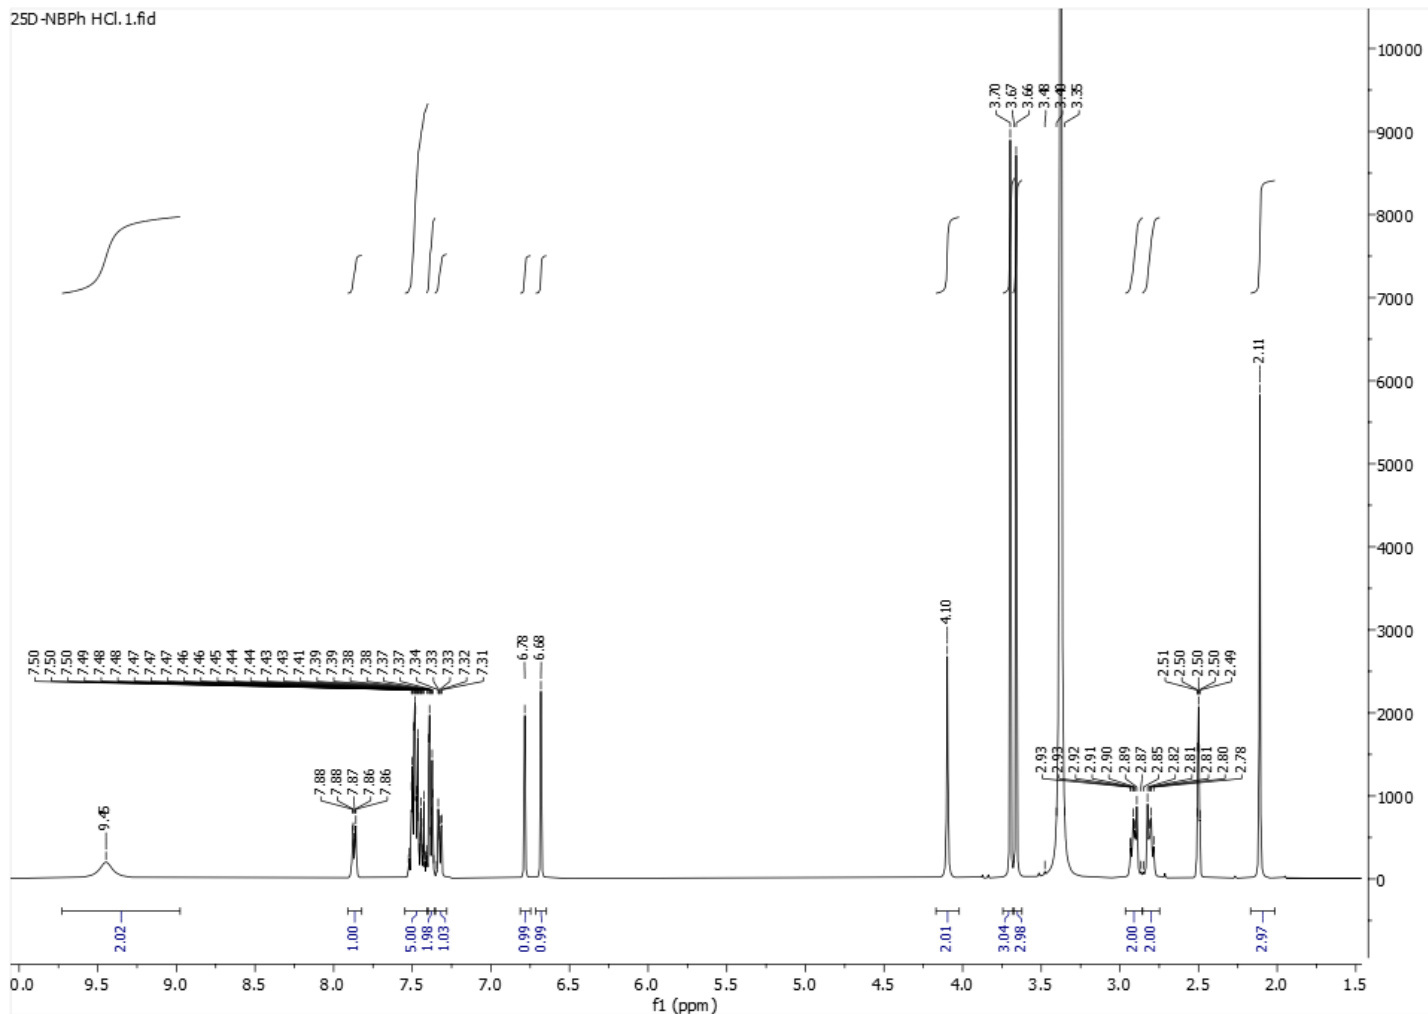

# Spectra 27. <sup>1</sup>H NMR of 25O-N1-Nap (28) HCl

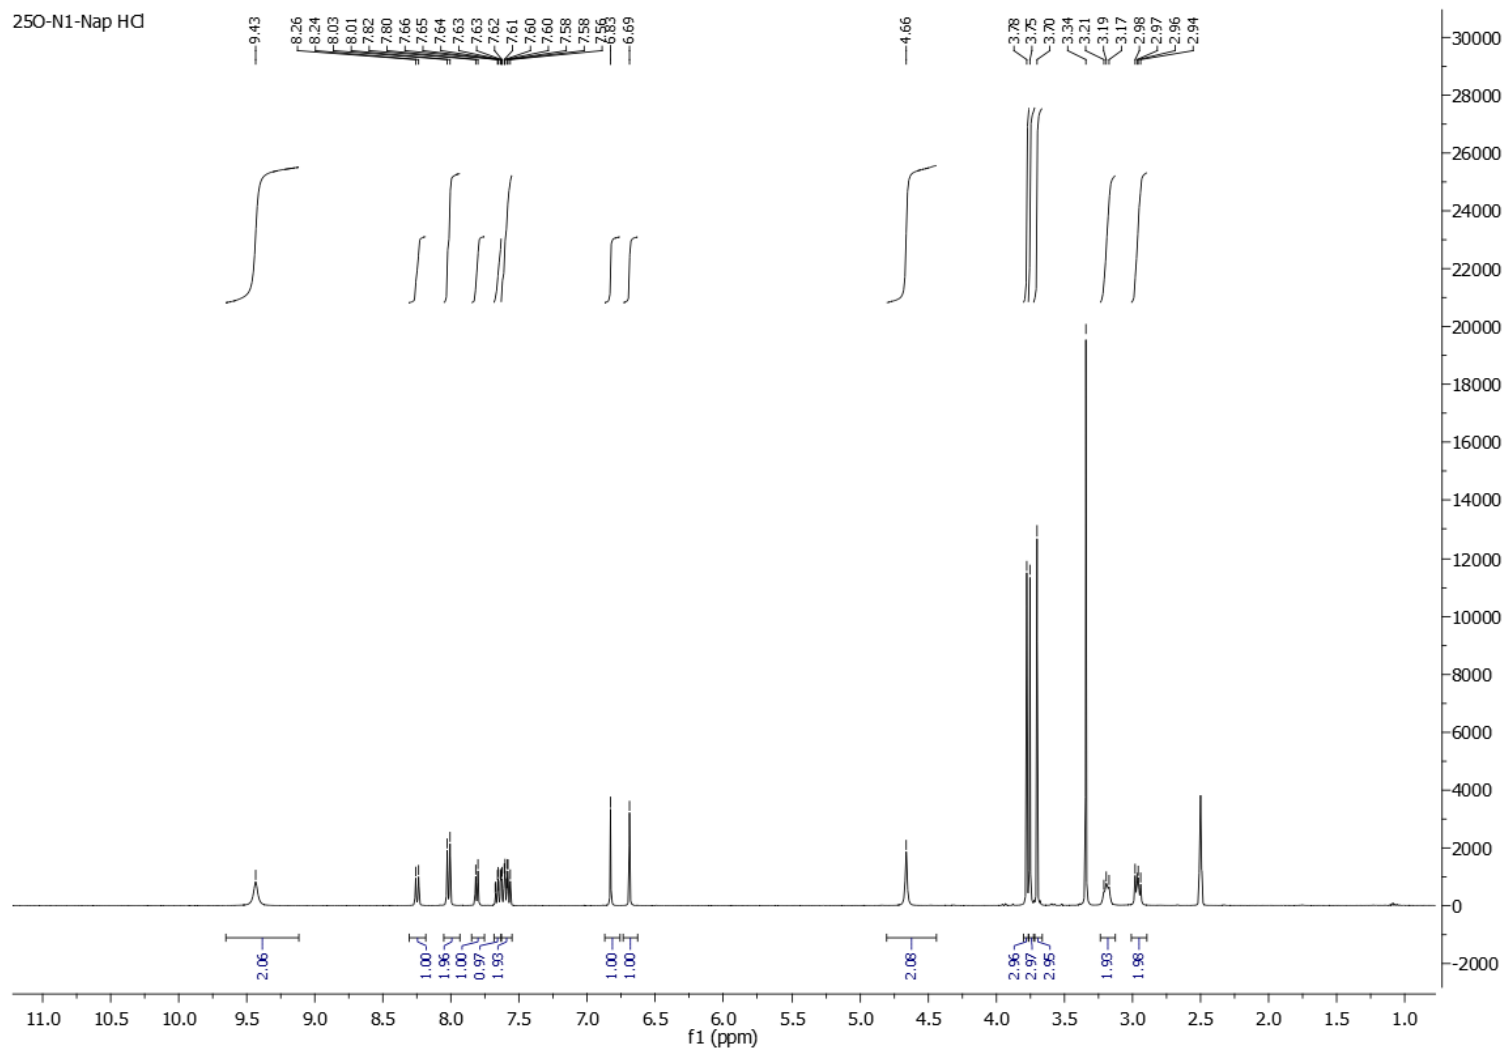

# Spectra 28. <sup>1</sup>H NMR spectrum of 2C2-N1-Nap (29) HCl

2C2-N-1-Nap HCl.1.fid

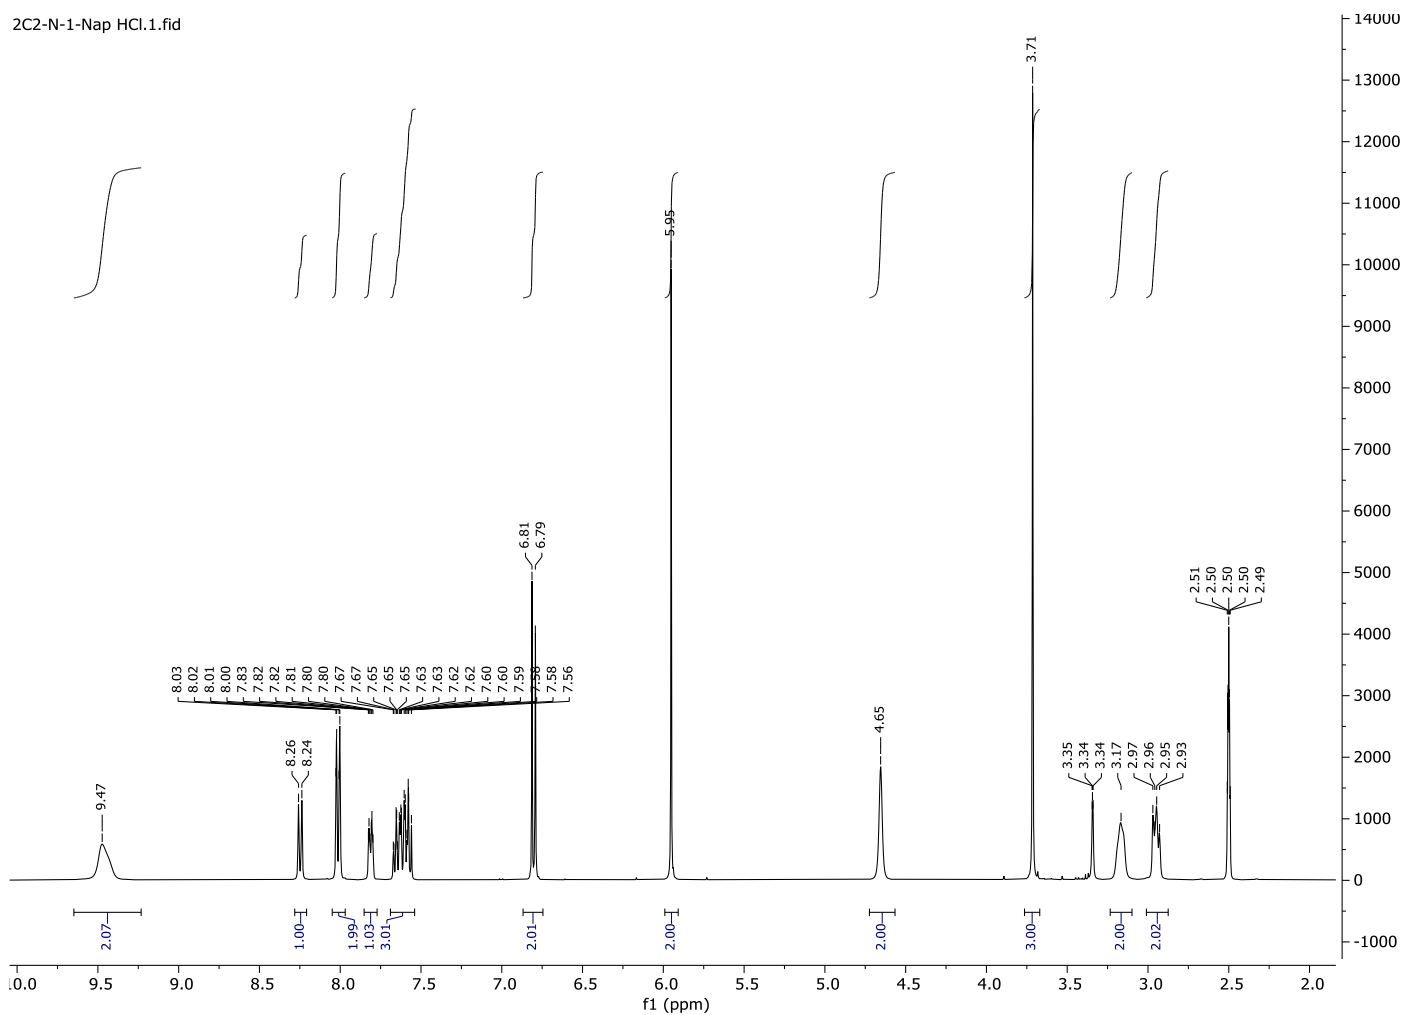

# Spectra 29. <sup>1</sup>H NMR spectrum of Ψ-DOB-N1-Nap (30) HCl

psi-DOB-N1-NAP-HCl.10.fid

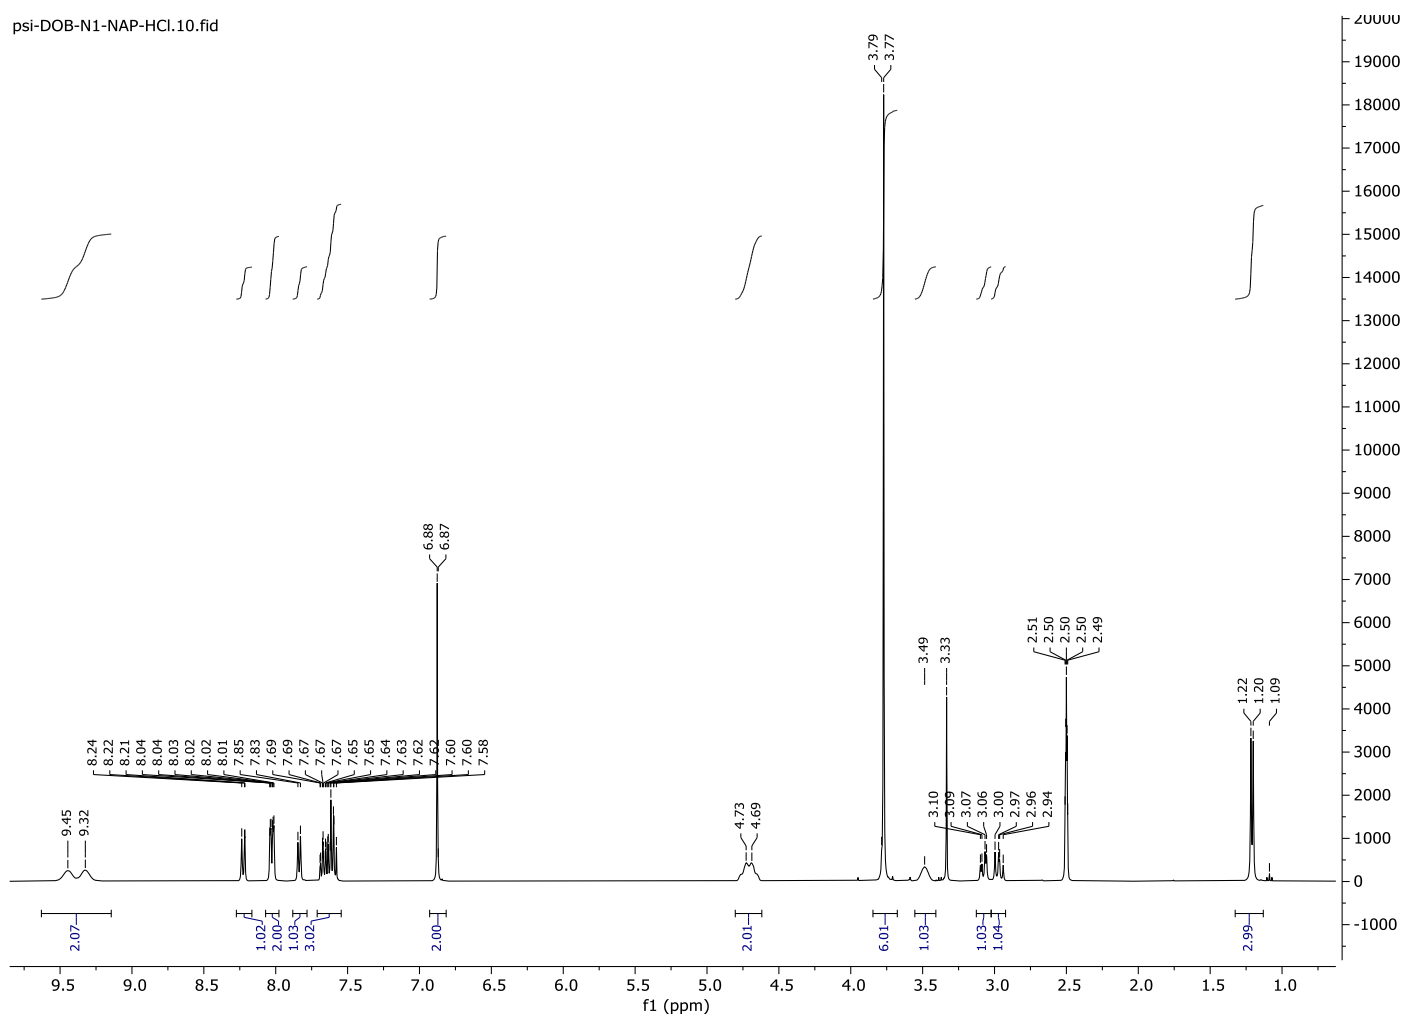

# Spectra 30. <sup>1</sup>H NMR of 2C2-NBOMe (31) HCl

2C2-NBOMe HCl

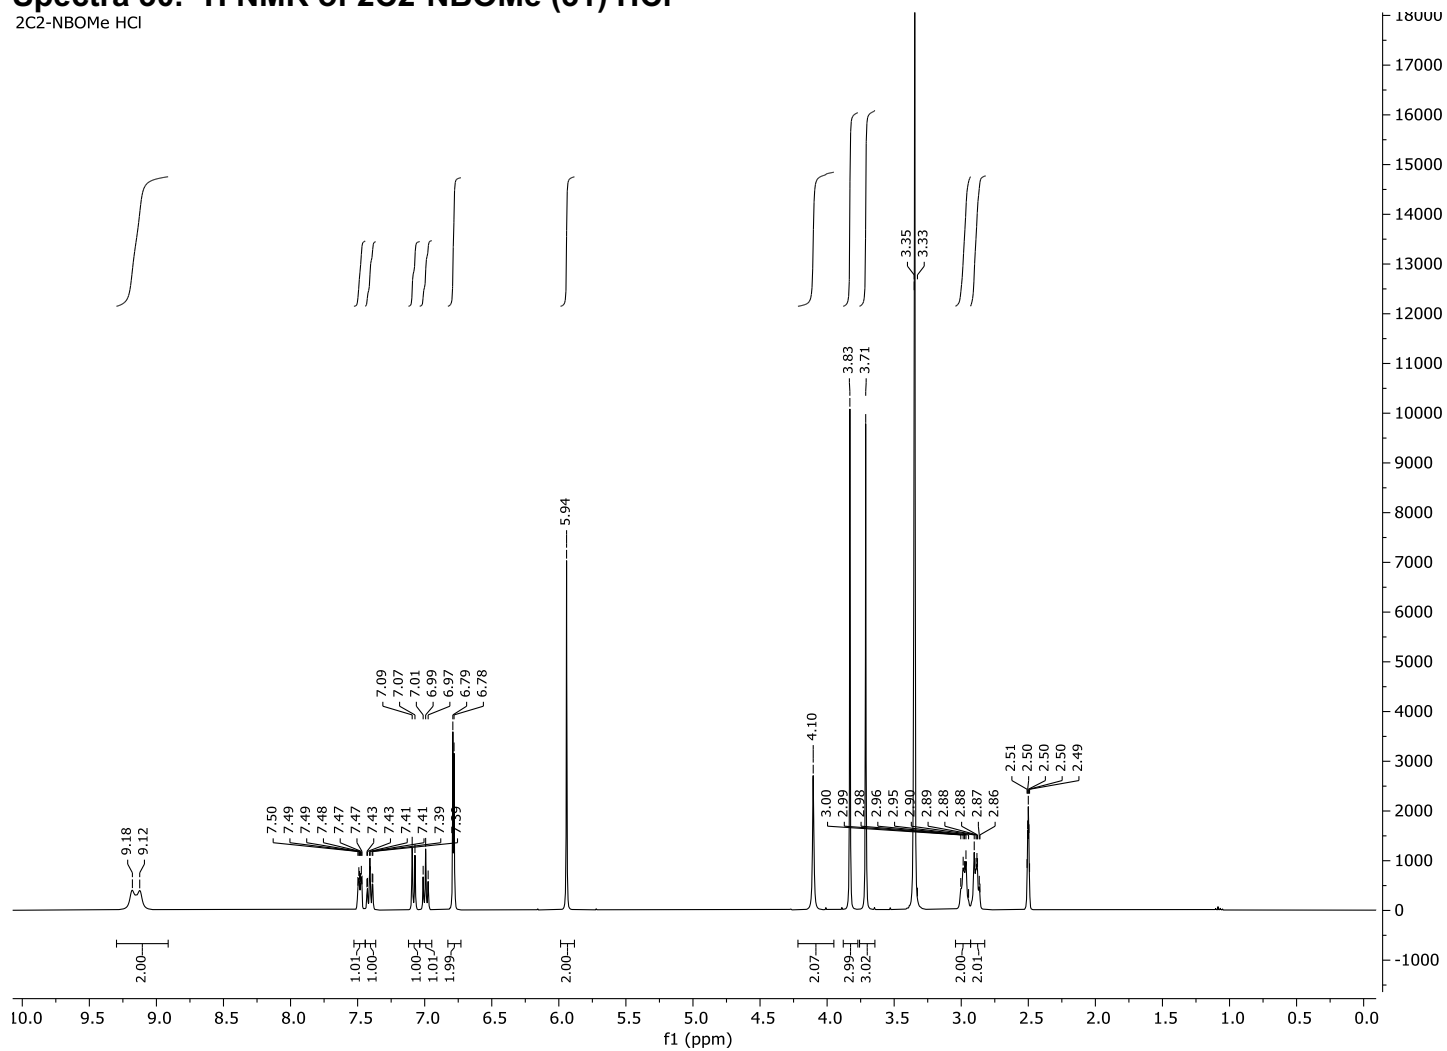

# Spectra 31. <sup>1</sup>H NMR of 25O-NBOMe (32) HCl

25O-NBOMe HCl.10.fid

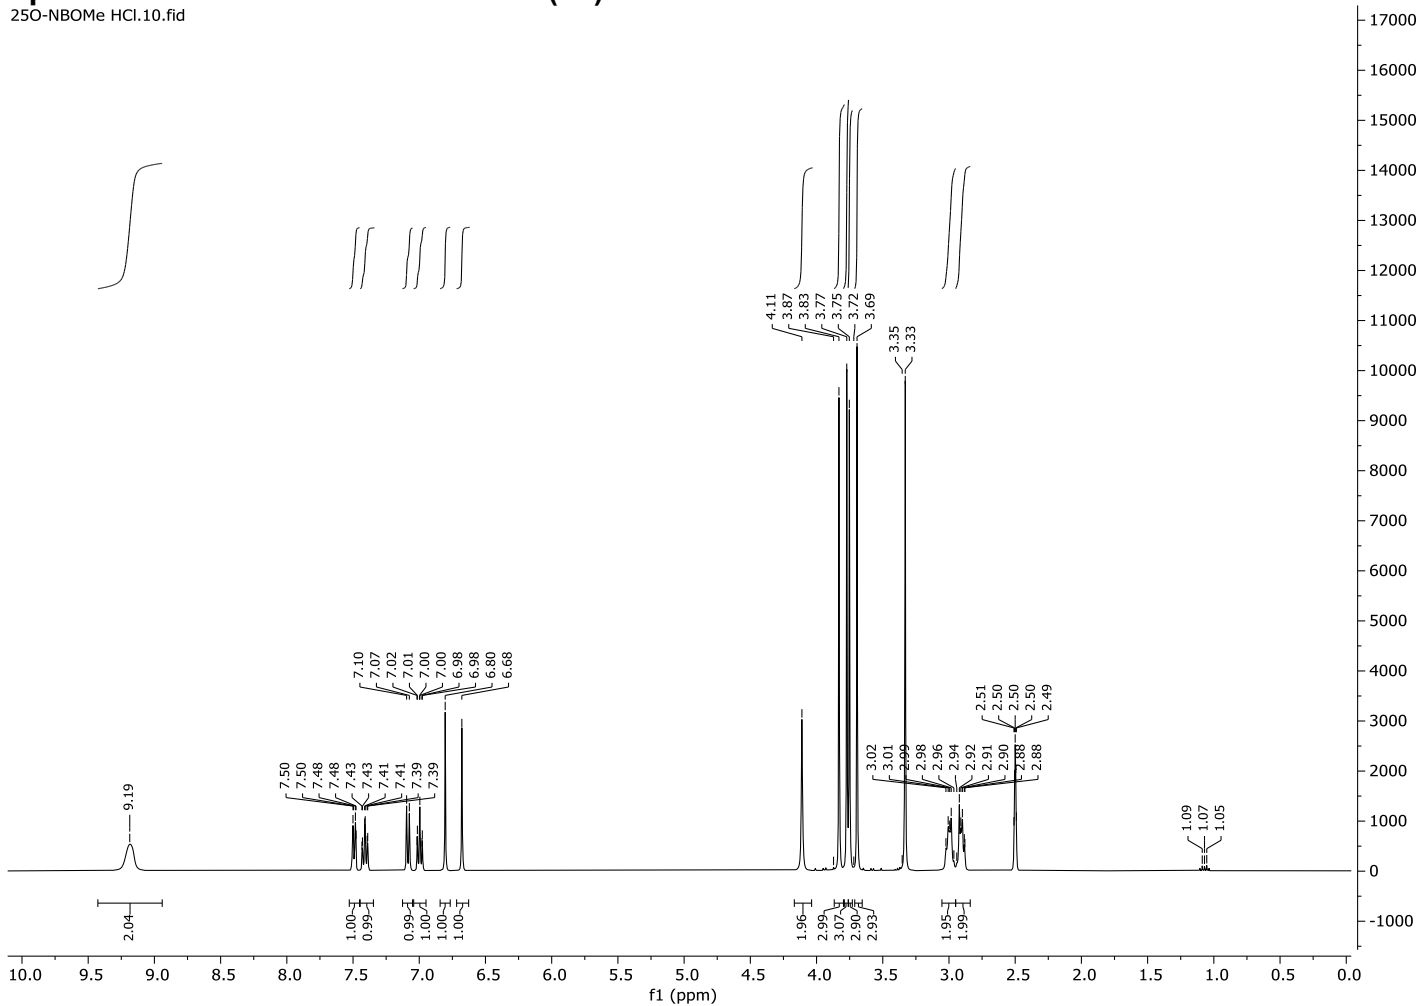

# Spectra 32. <sup>1</sup>H NMR of 25O-NBcP (33) HCl

25O-NBcP HCl

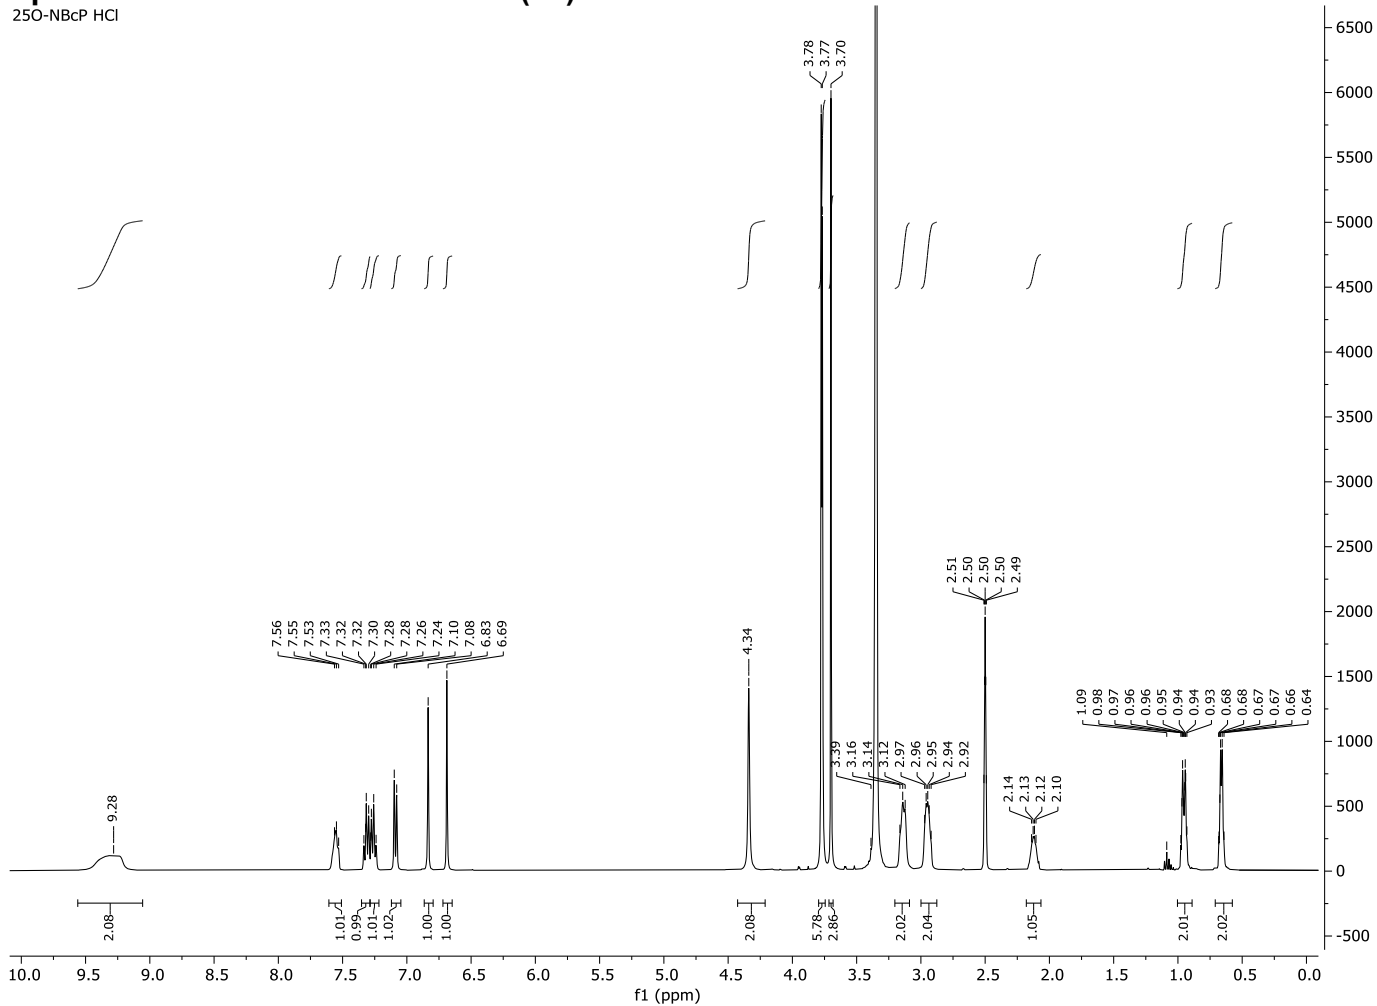



# Spectra 33. <sup>1</sup>H NMR of 25O-NB-3-I (34) HCl

25O-NB-3-I HCl

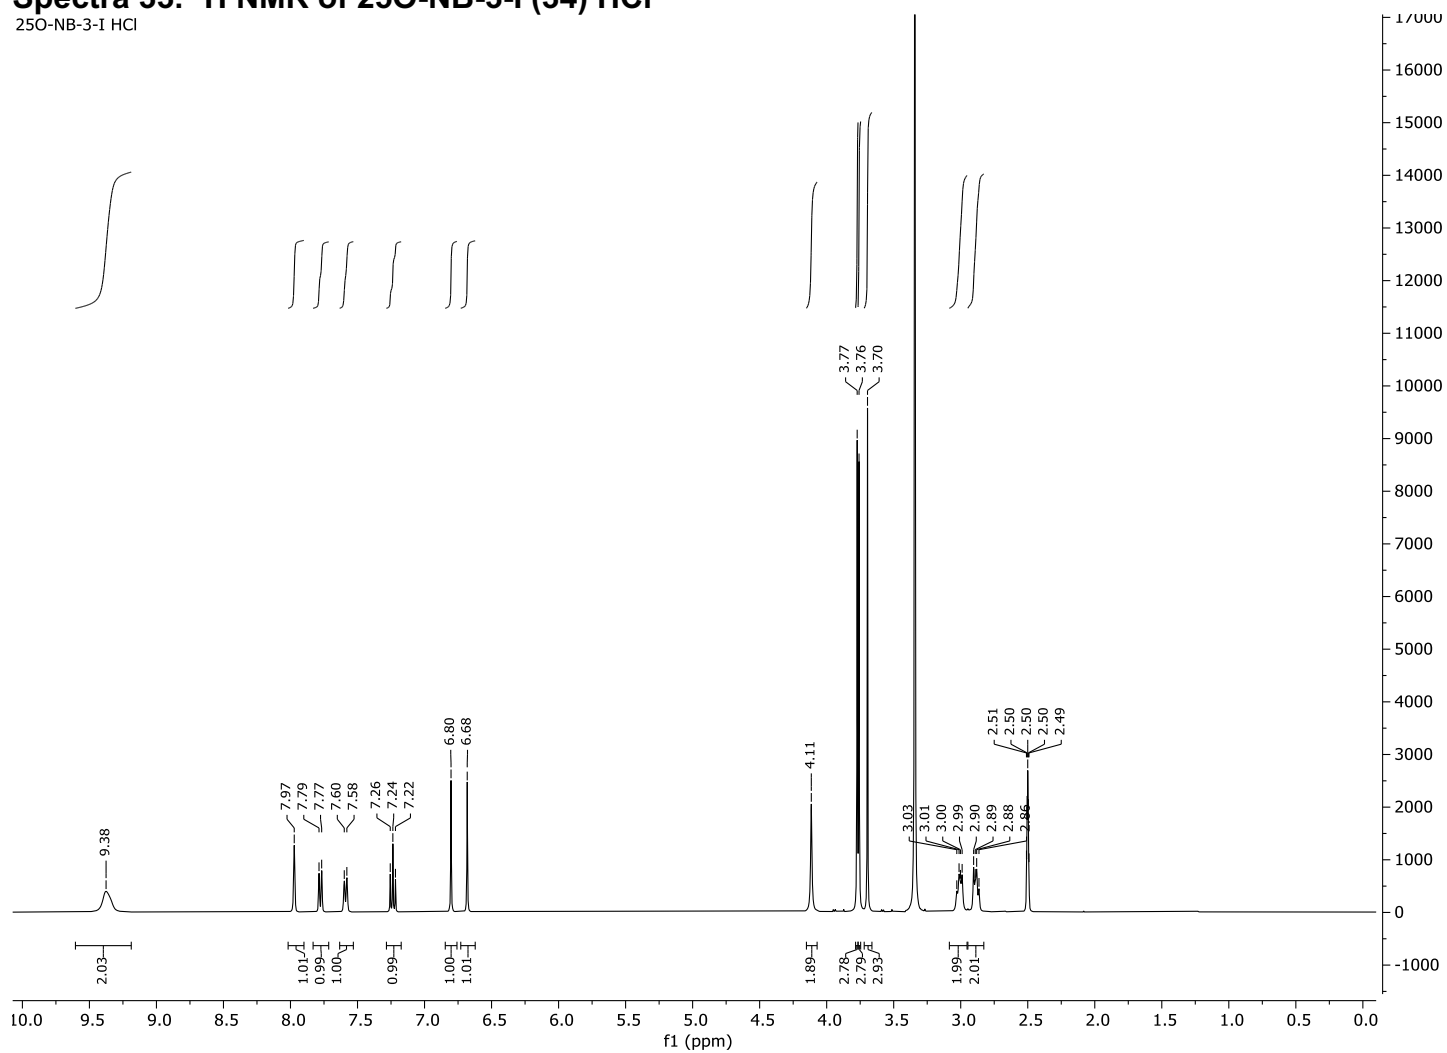

# Spectra 34. <sup>1</sup>H NMR of 25O-NBPh-10'-OH (35) HCl

25O-NBPh-10'-OH HCl

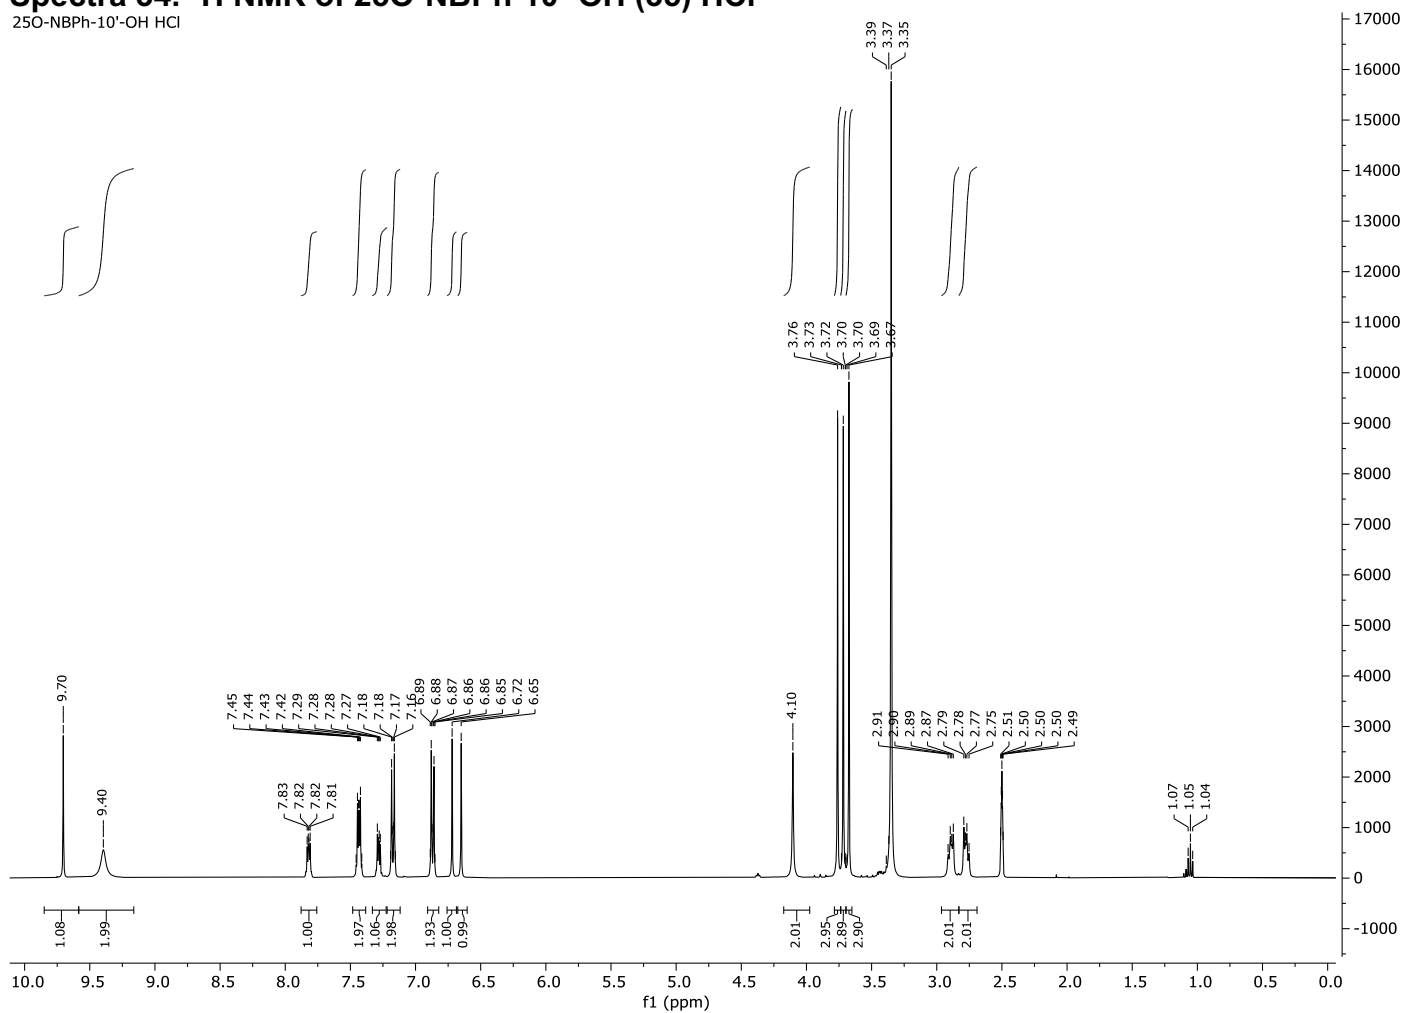

# <sup>13</sup>C NMR Spectra of Synthesized N-Benzyl Phenethylamines

## Spectra 35. <sup>13</sup>C NMR of 25N-NB (2) HCl

25N-NB HCl

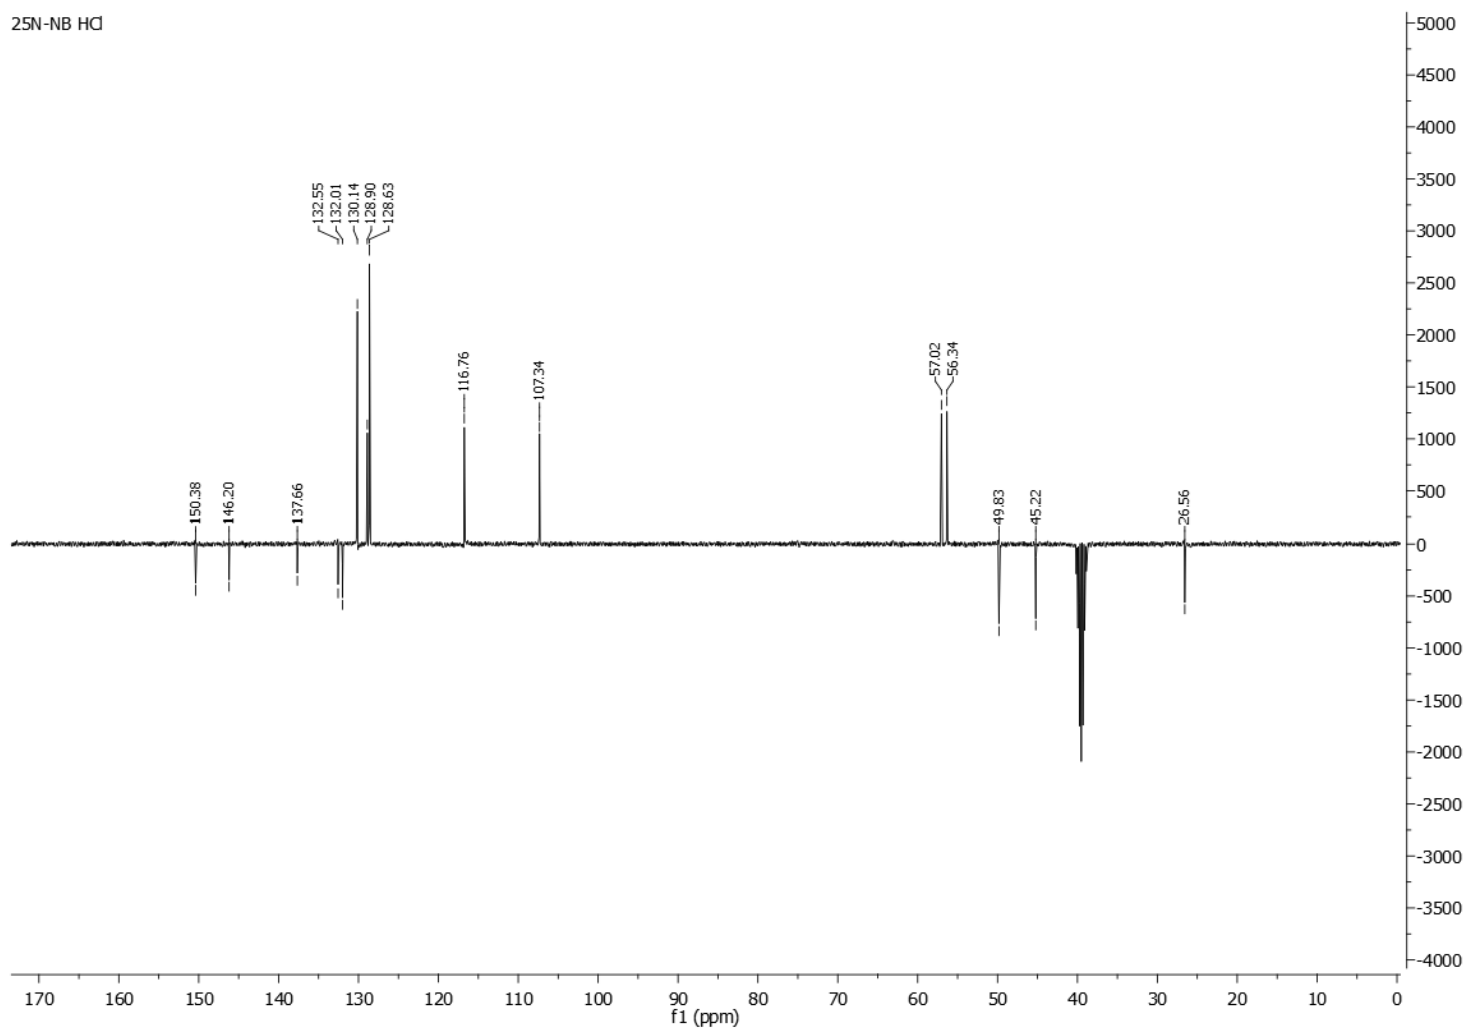

# Spectra 36. <sup>13</sup>C NMR of 25N-NBOH (3) HCl

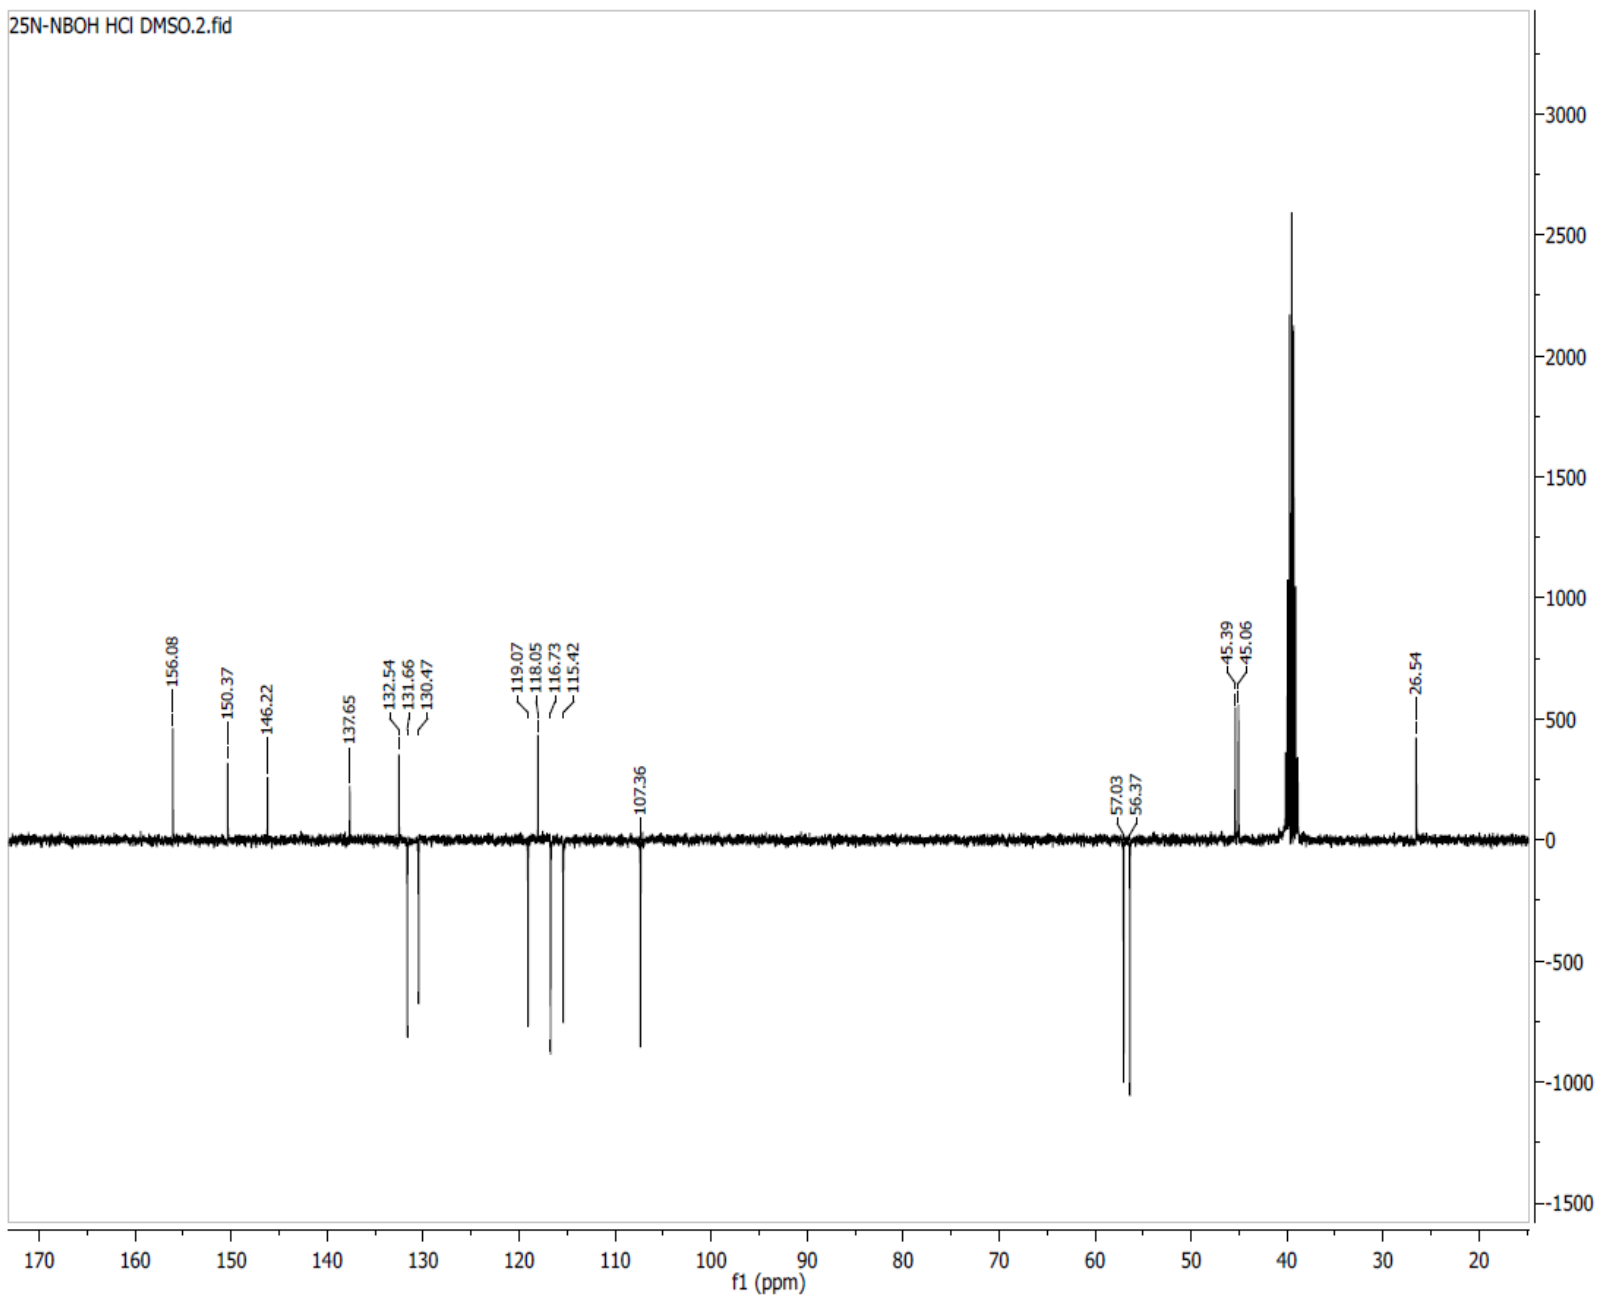

# Spectra 37. $^{13}\text{C}$ NMR of 25N-NBOMe (4) HCl

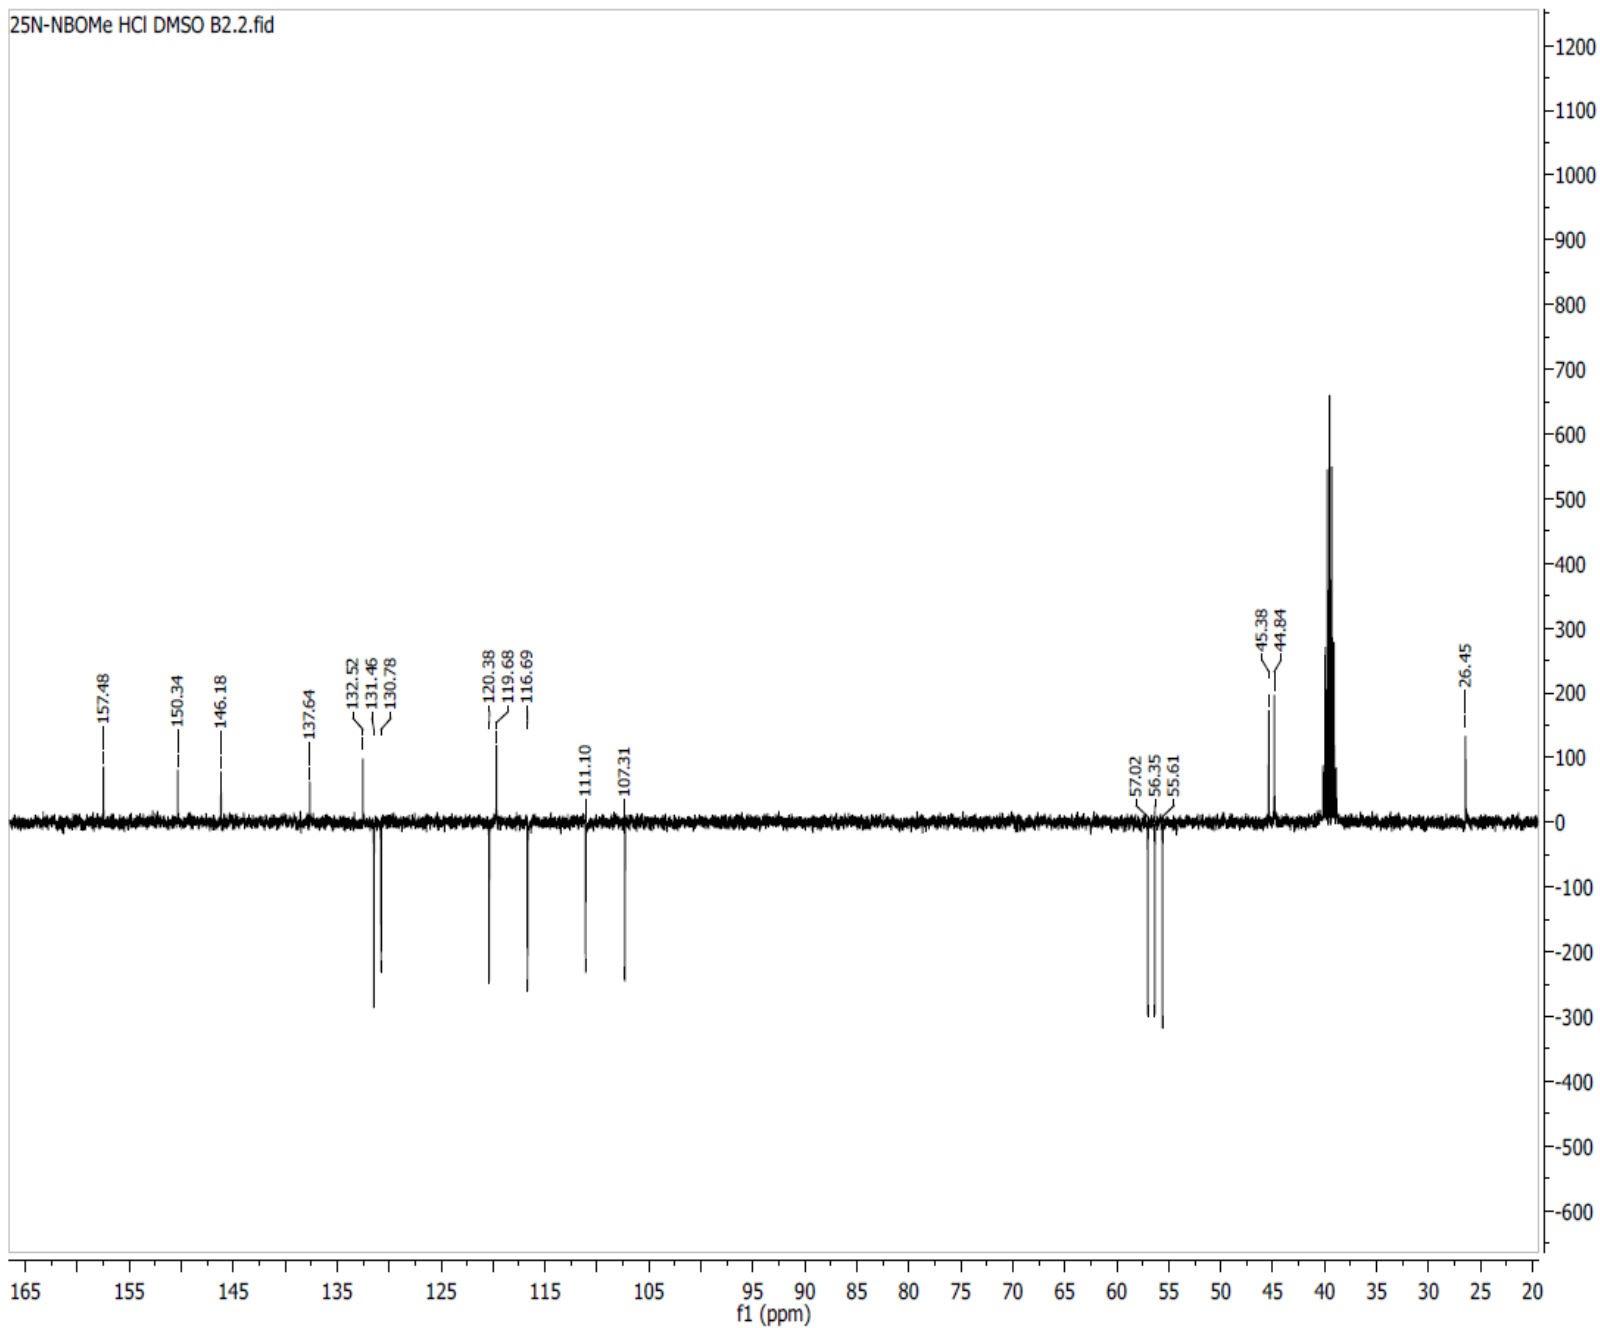

# Spectra 38. <sup>13</sup>C NMR of 25N-NBOEt (5) HCl

25N-NBOEt HCl DMSO.2.fid

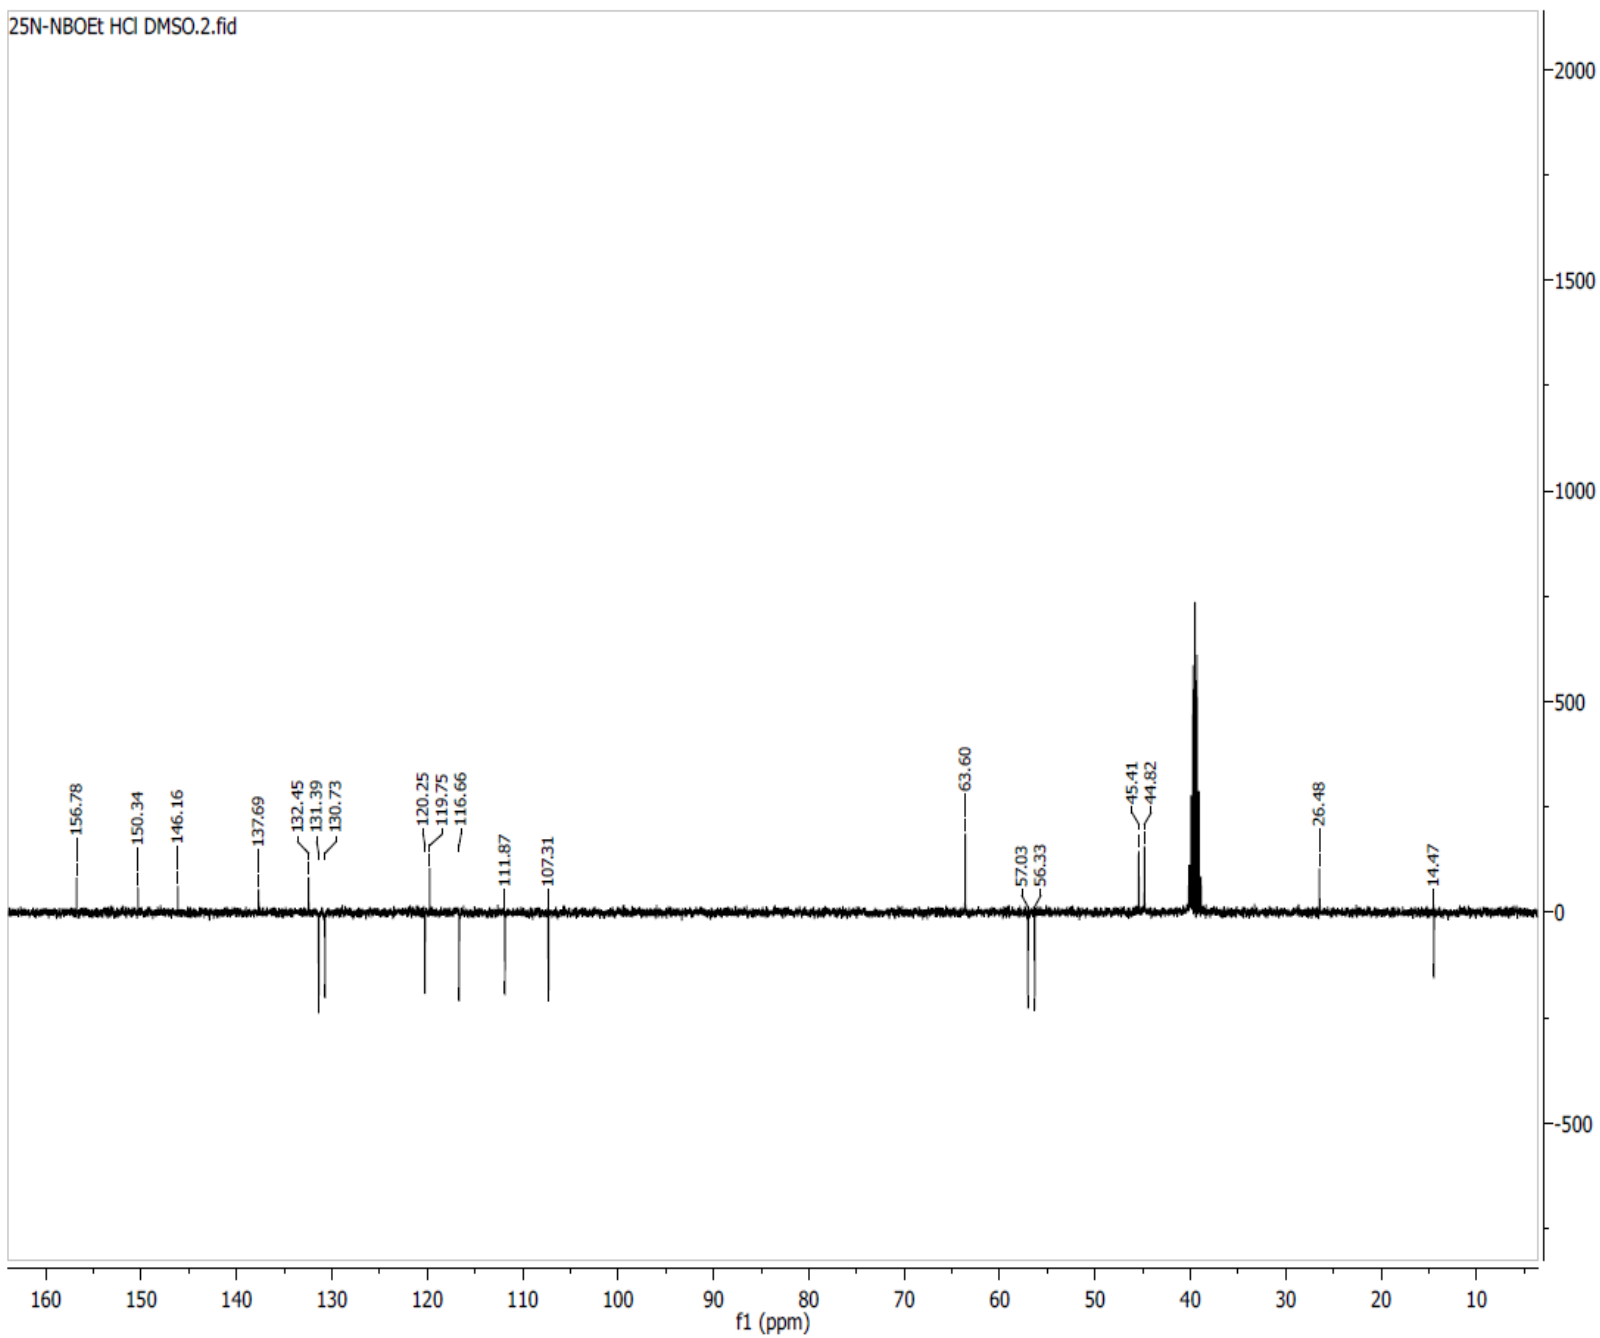

# Spectra 39. <sup>13</sup>C NMR of 25N-NBMe (6) HCl

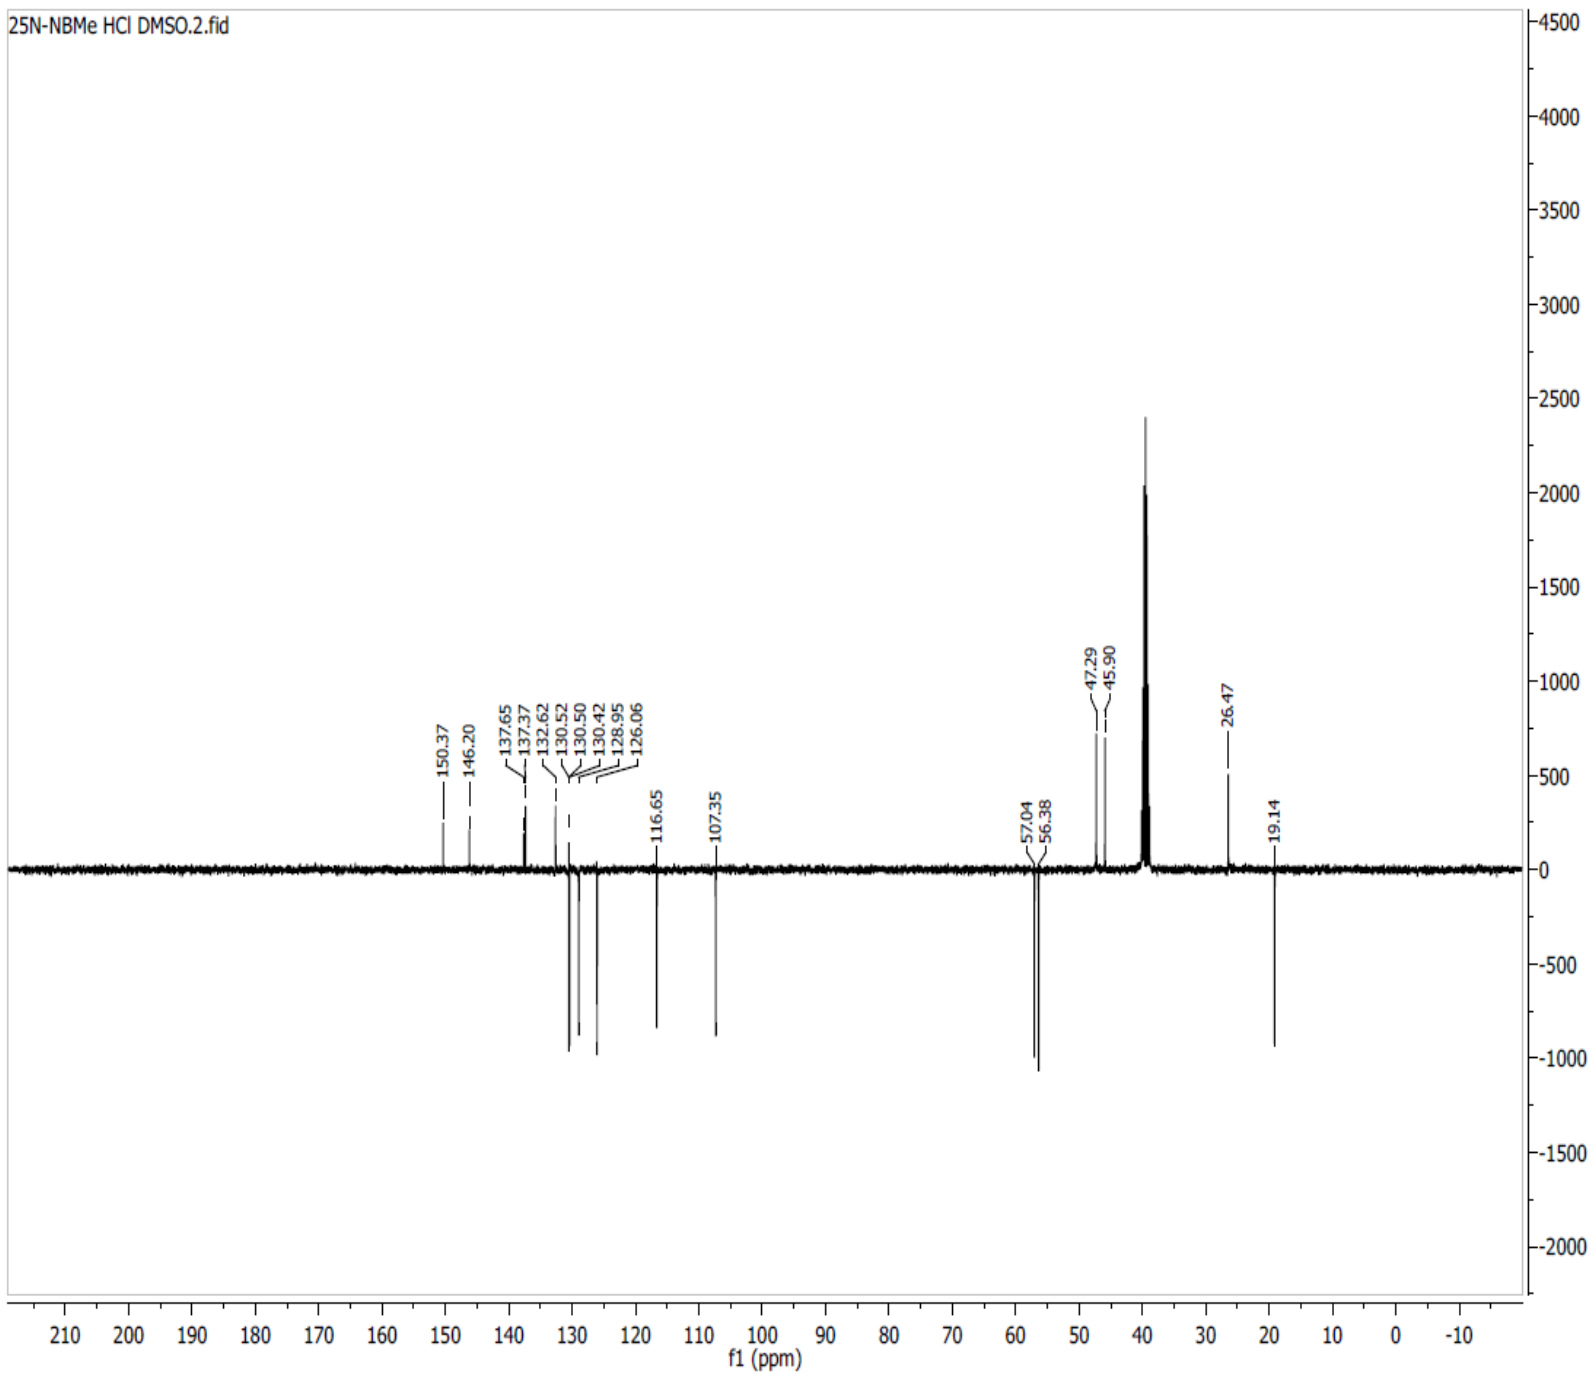

# Spectra 40. <sup>13</sup>C NMR of 25N-NBF (7) HCl

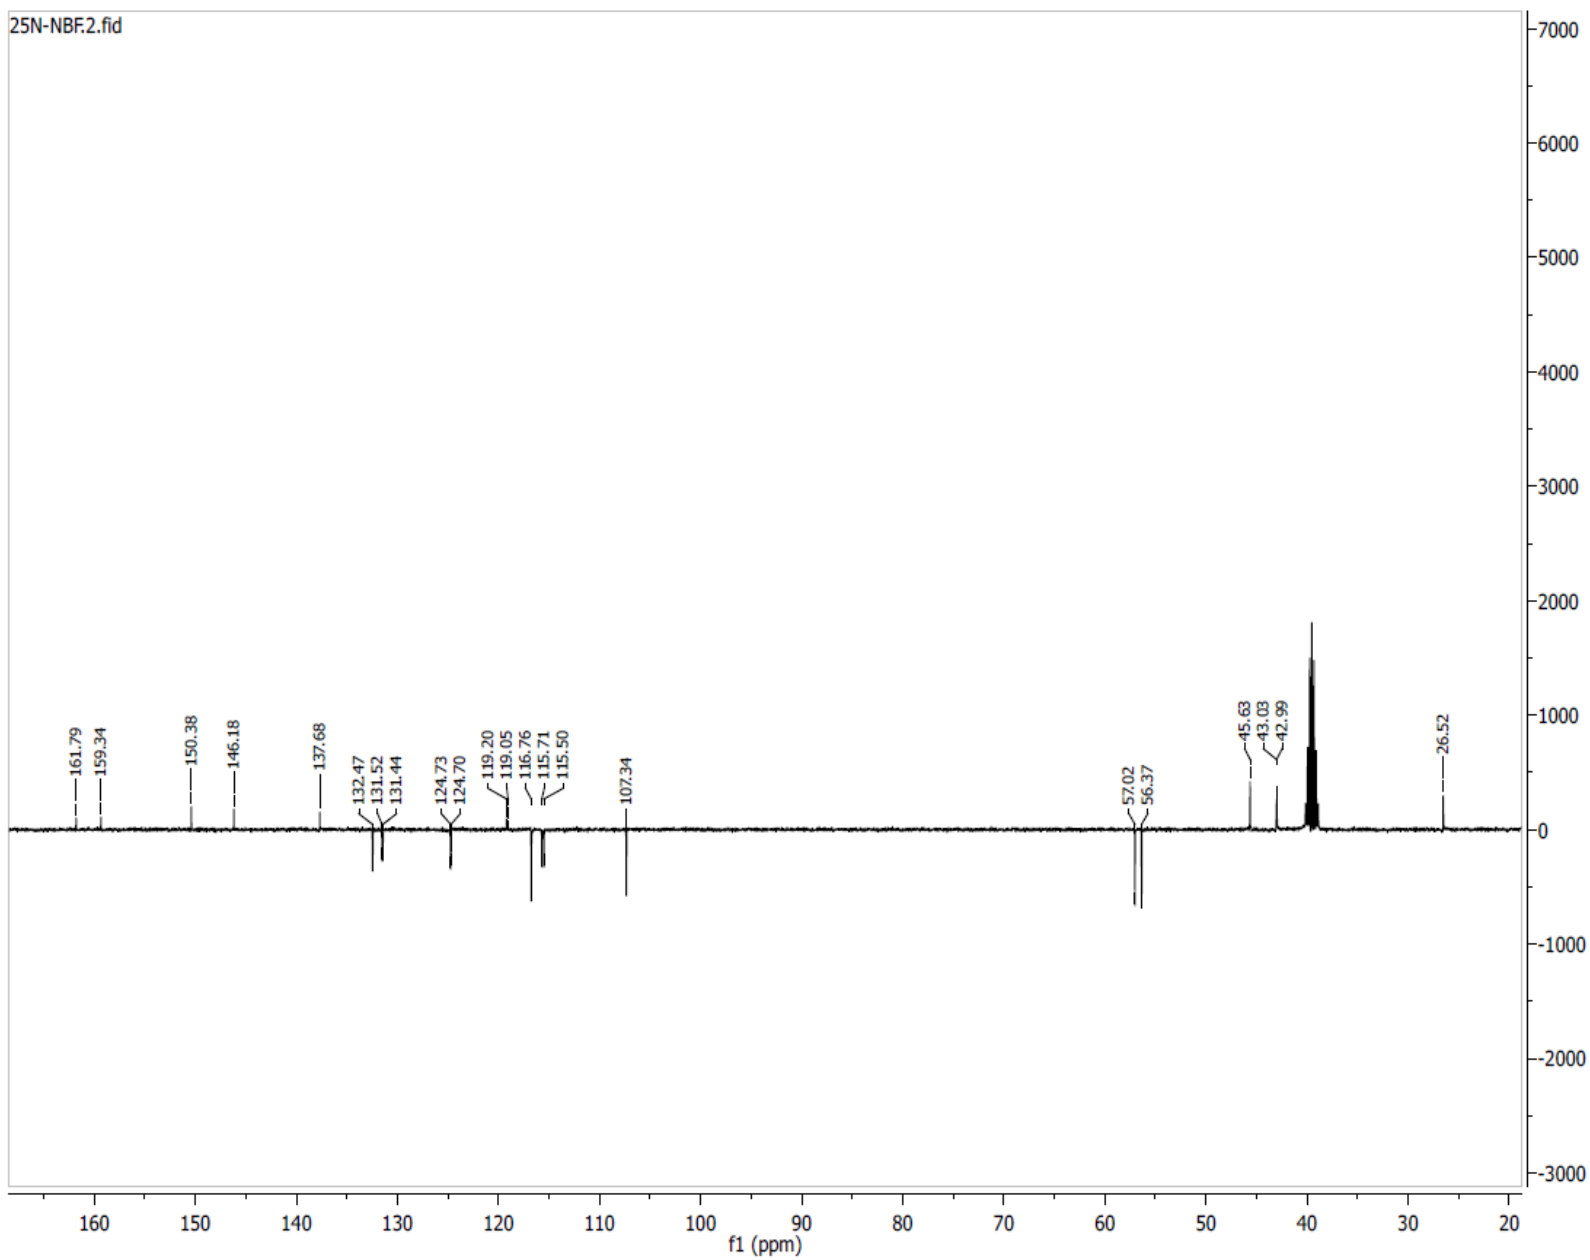



# Spectra 41. <sup>13</sup>C NMR of 25N-NBCl (8) HCl

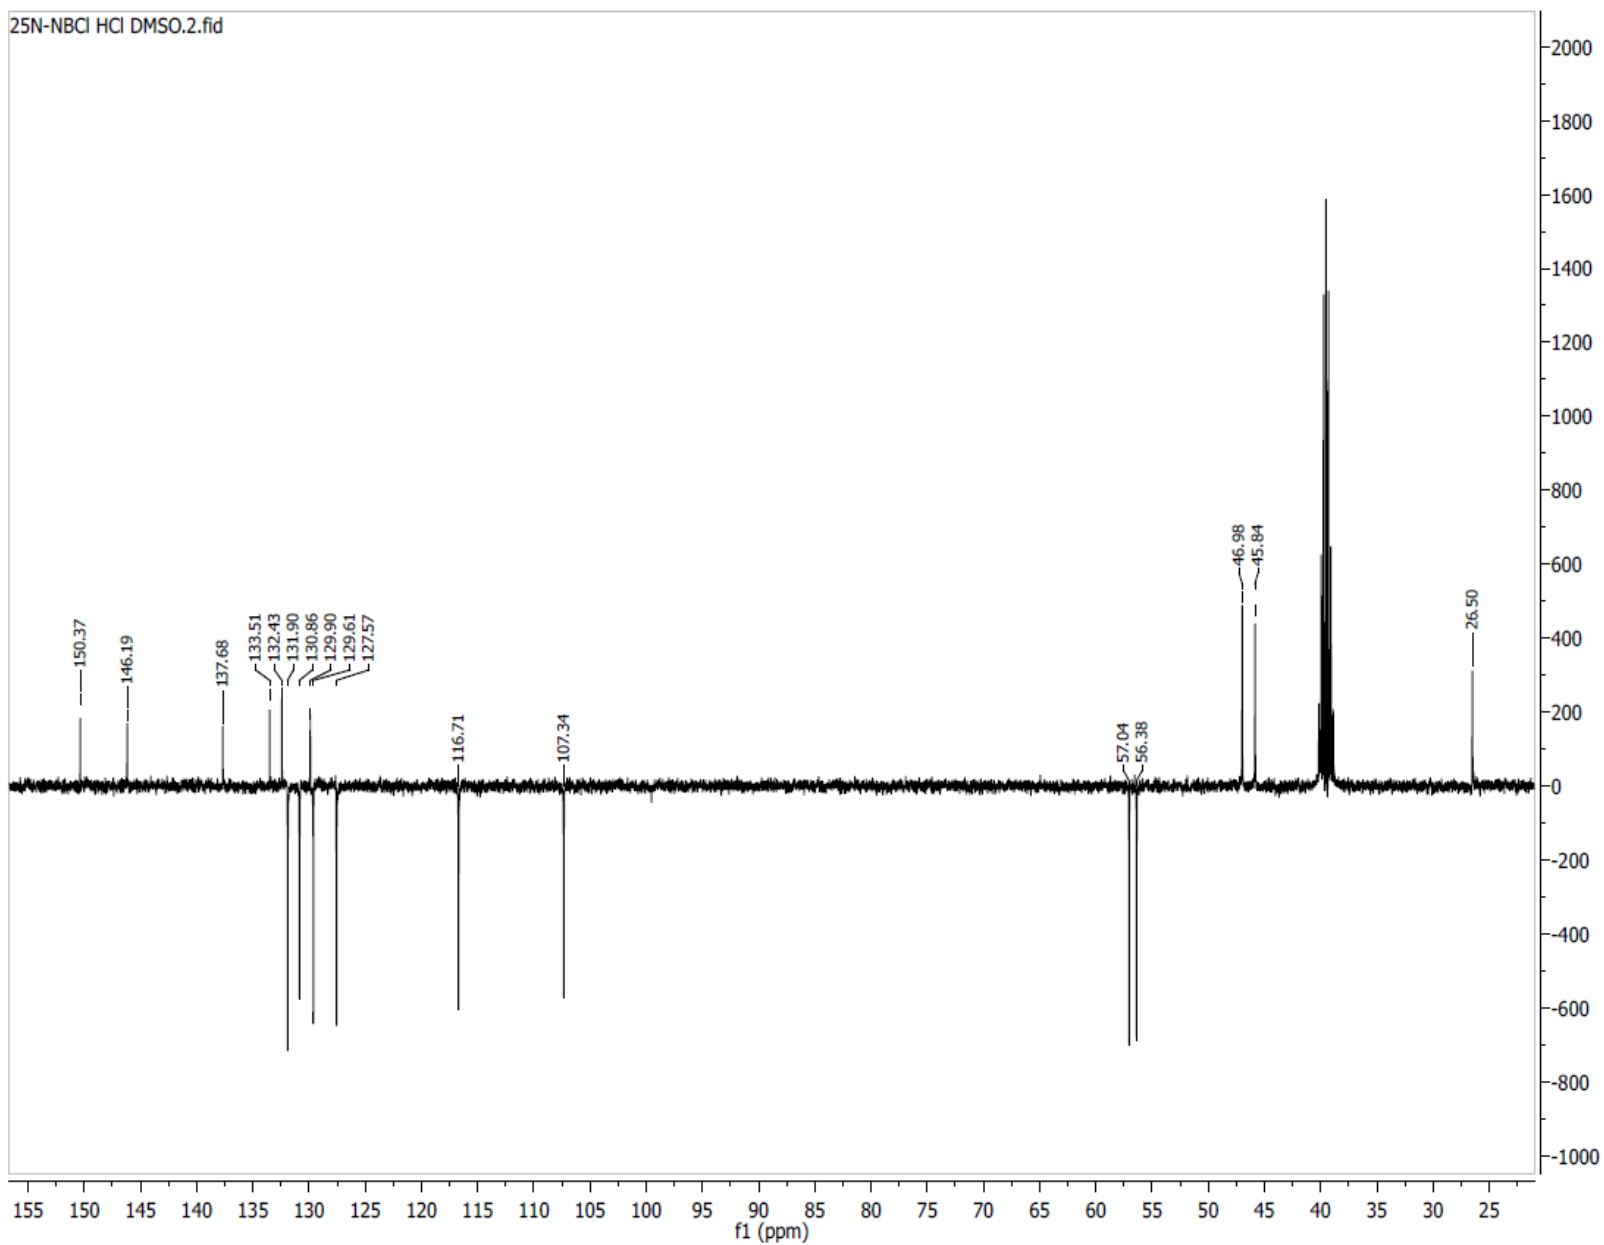

# Spectra 42. <sup>13</sup>C NMR of 25N-NBBBr (9) HCl

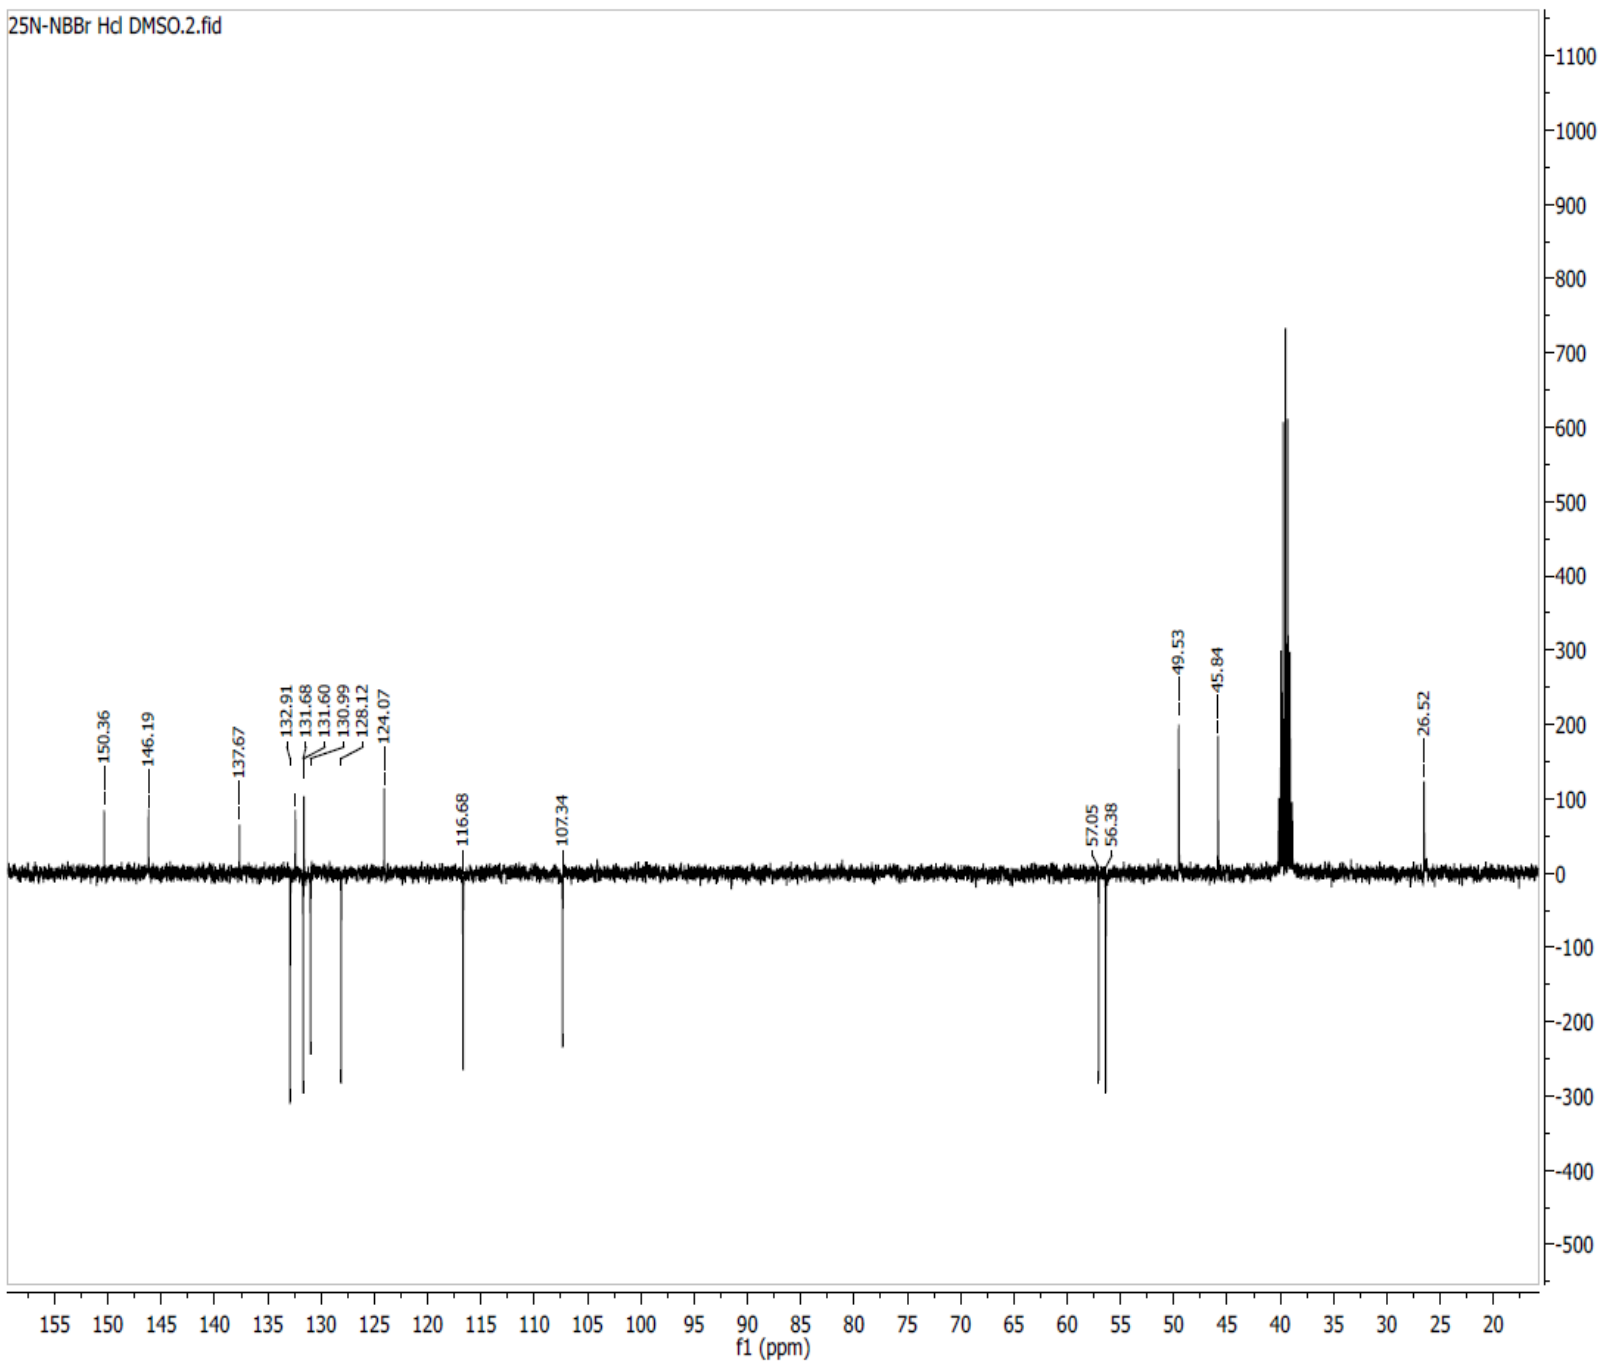

# Spectra 43. <sup>13</sup>C NMR of 25N-NBI (10) HCl

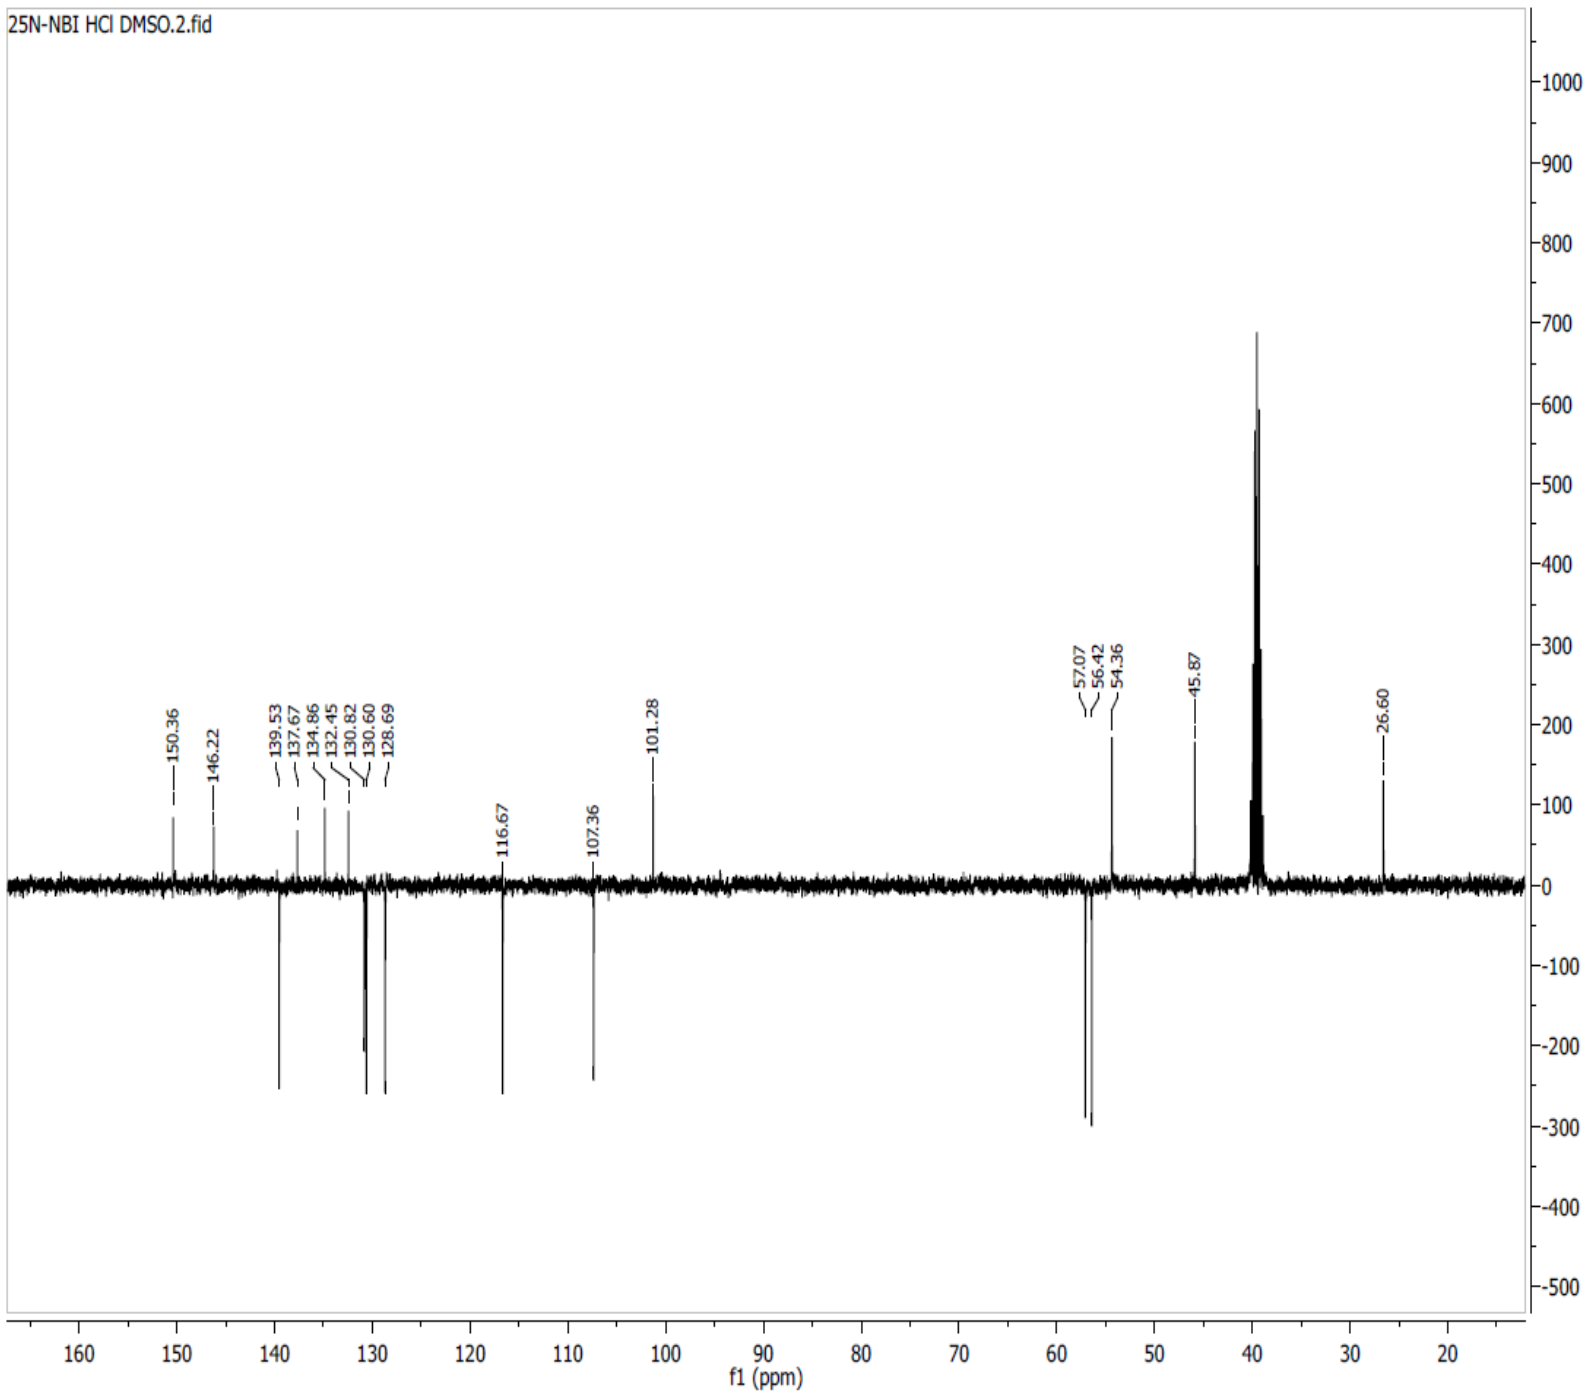

# Spectra 44. $^{13}\text{C}$ NMR of 25N-NBOCF<sub>2</sub>H (11) HCl

N-(2-OCF<sub>2</sub>H-Benzyl)-2CN HCl DMSO

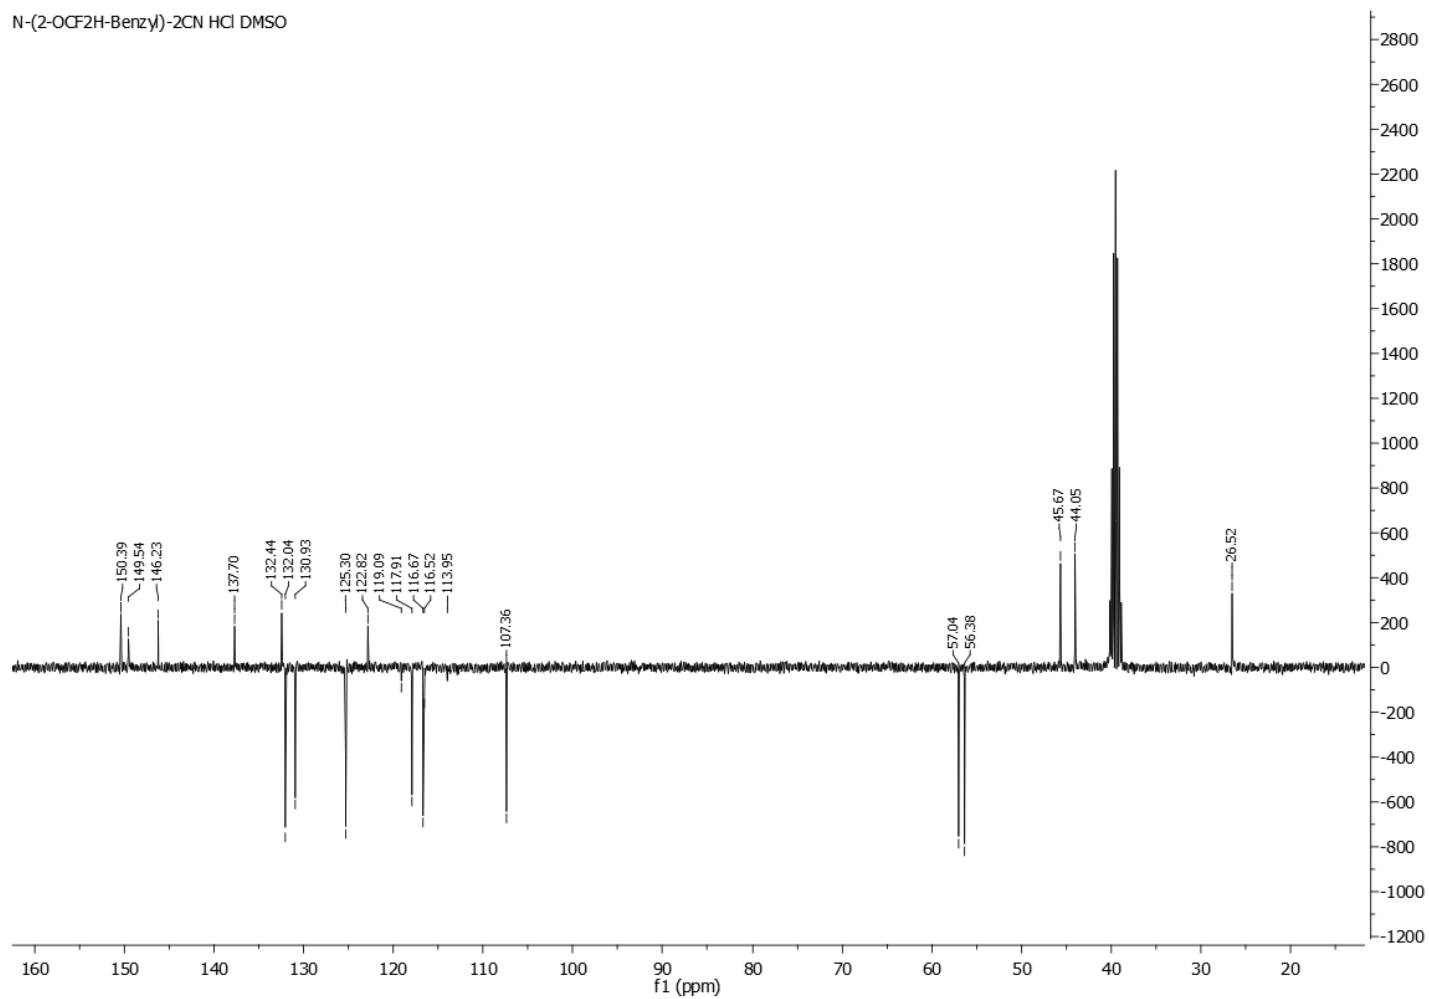

# Spectra 45. <sup>13</sup>C NMR of 25N-NBOCF<sub>3</sub> (12) HCl

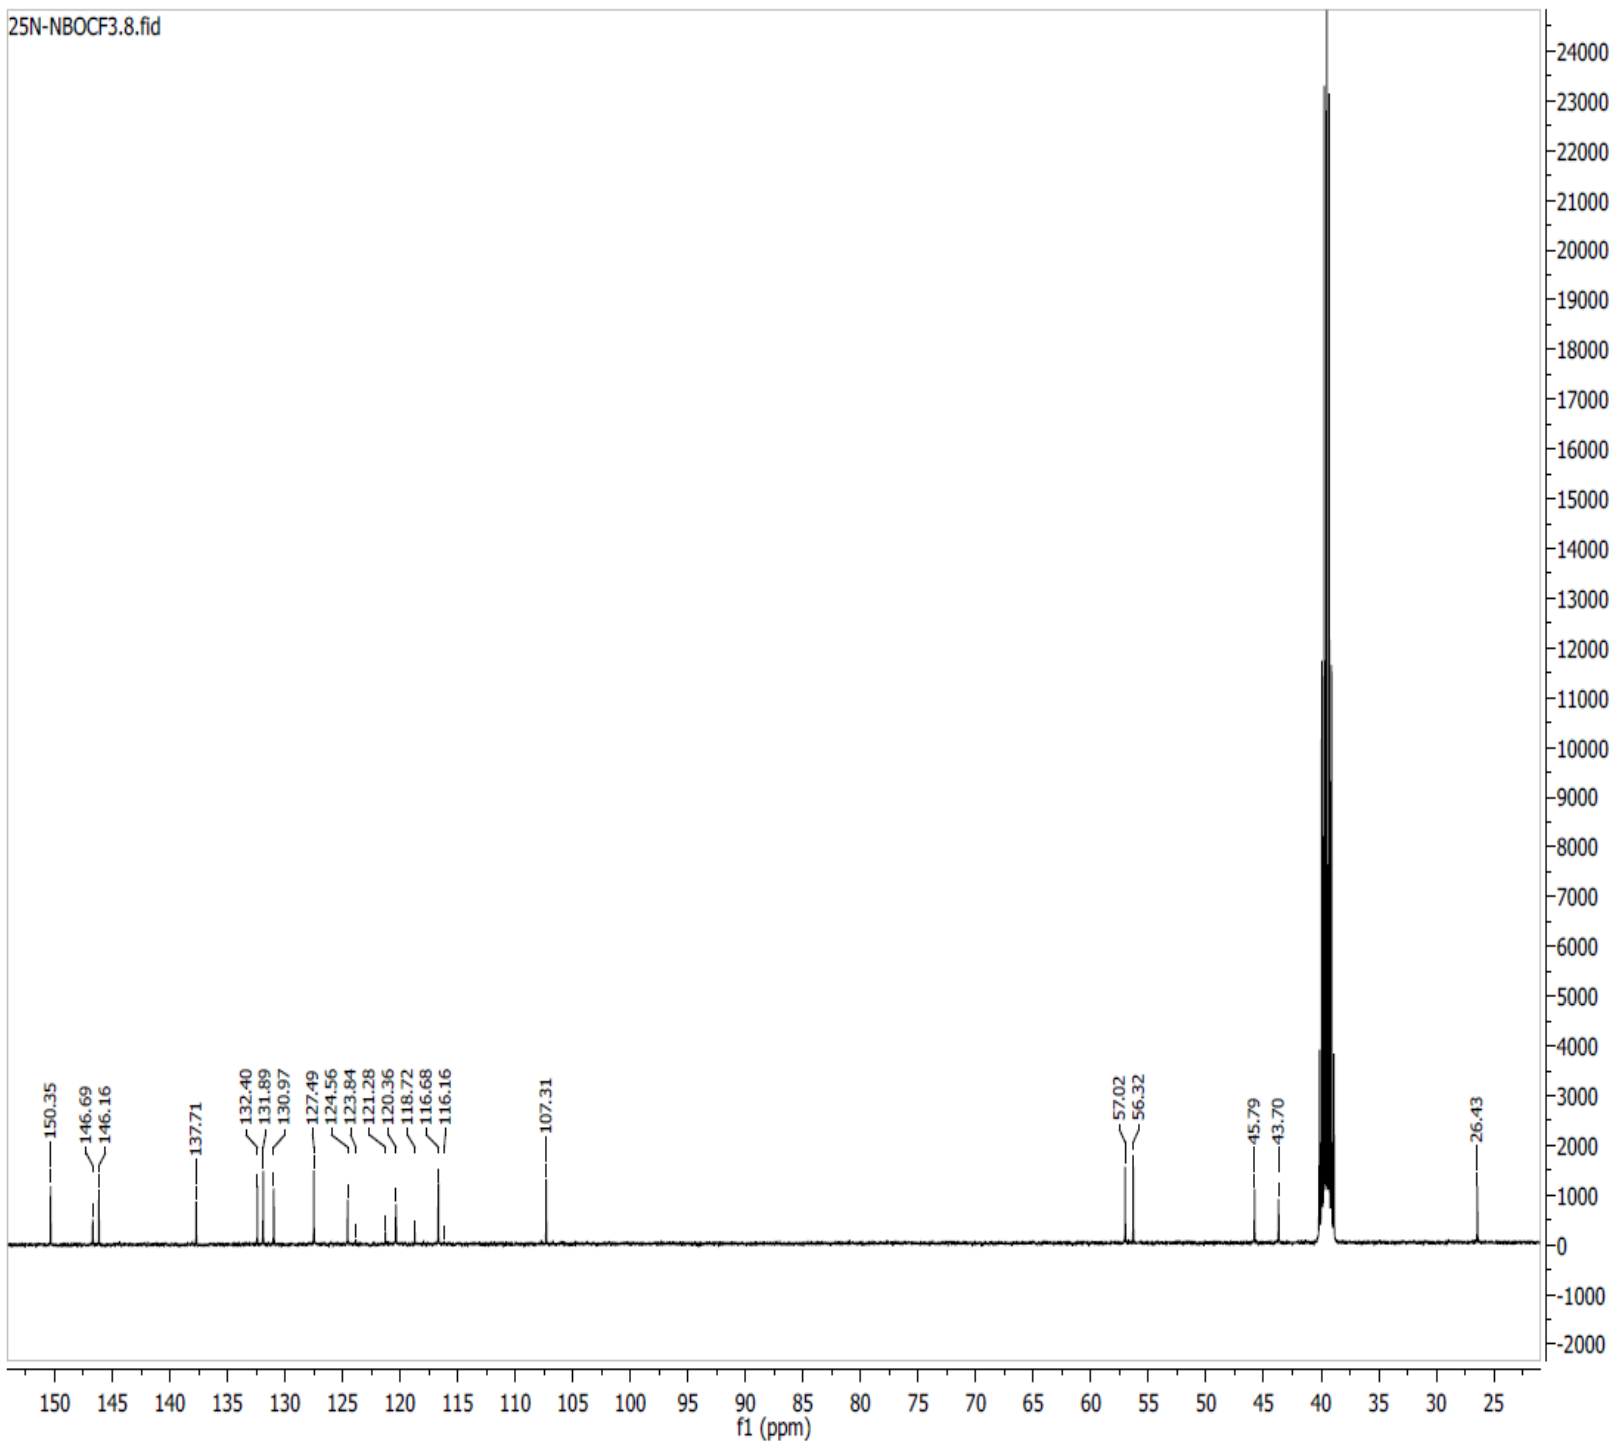

# Spectra 46. $^{13}\text{C}$ NMR of 25N-NBMDF<sub>2</sub> (13) HCl

25N-NBMDF2 HCl

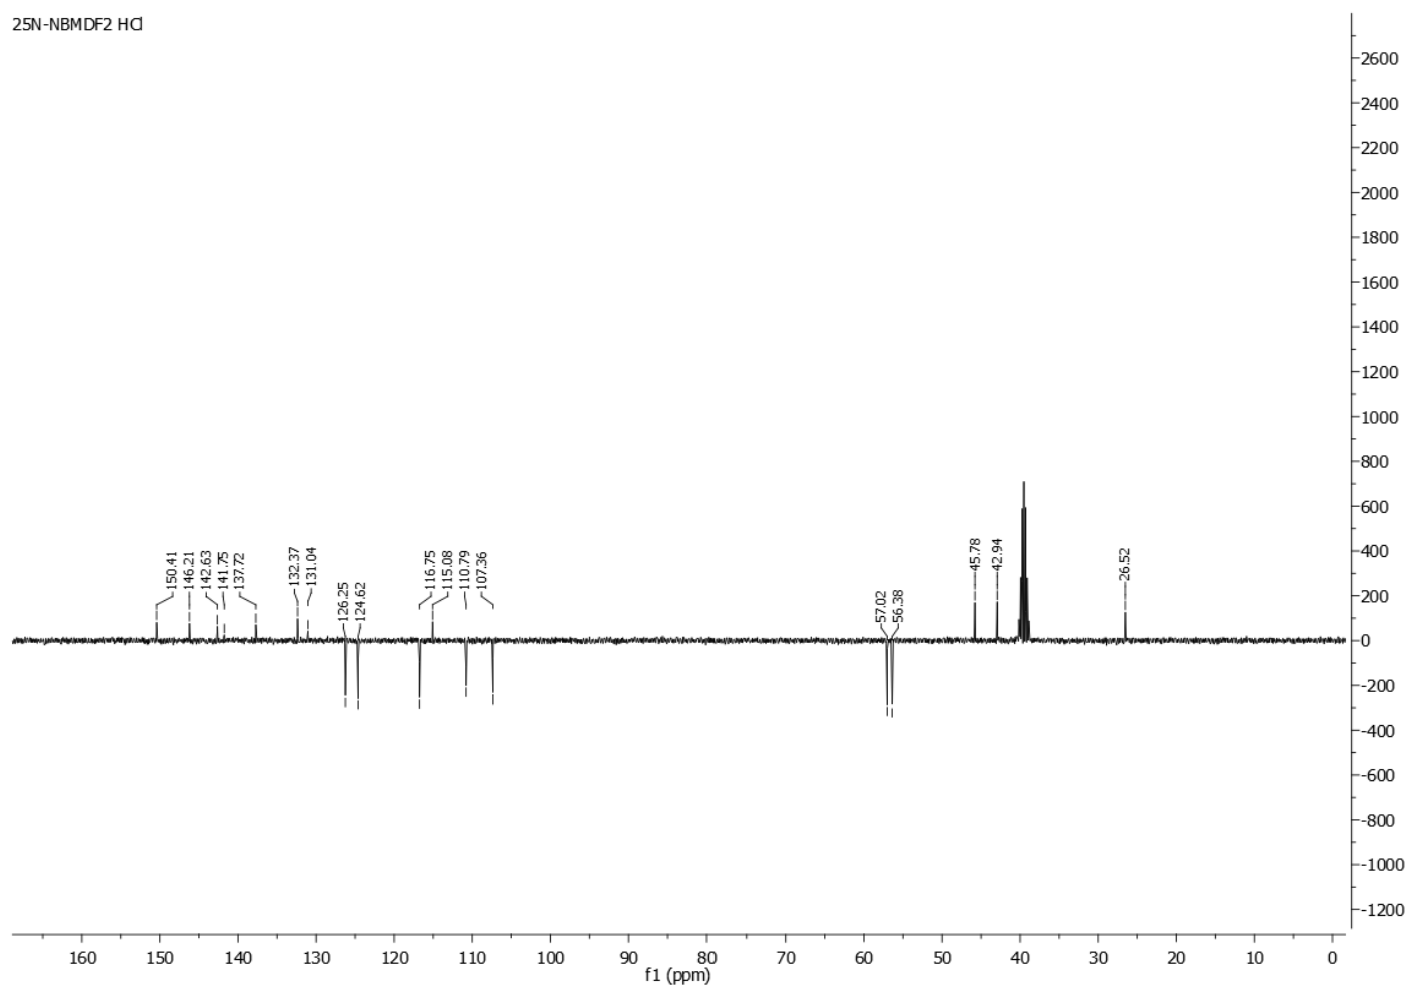

# Spectra 47. <sup>13</sup>C NMR of 25N-NBCF<sub>3</sub> (14) HCl

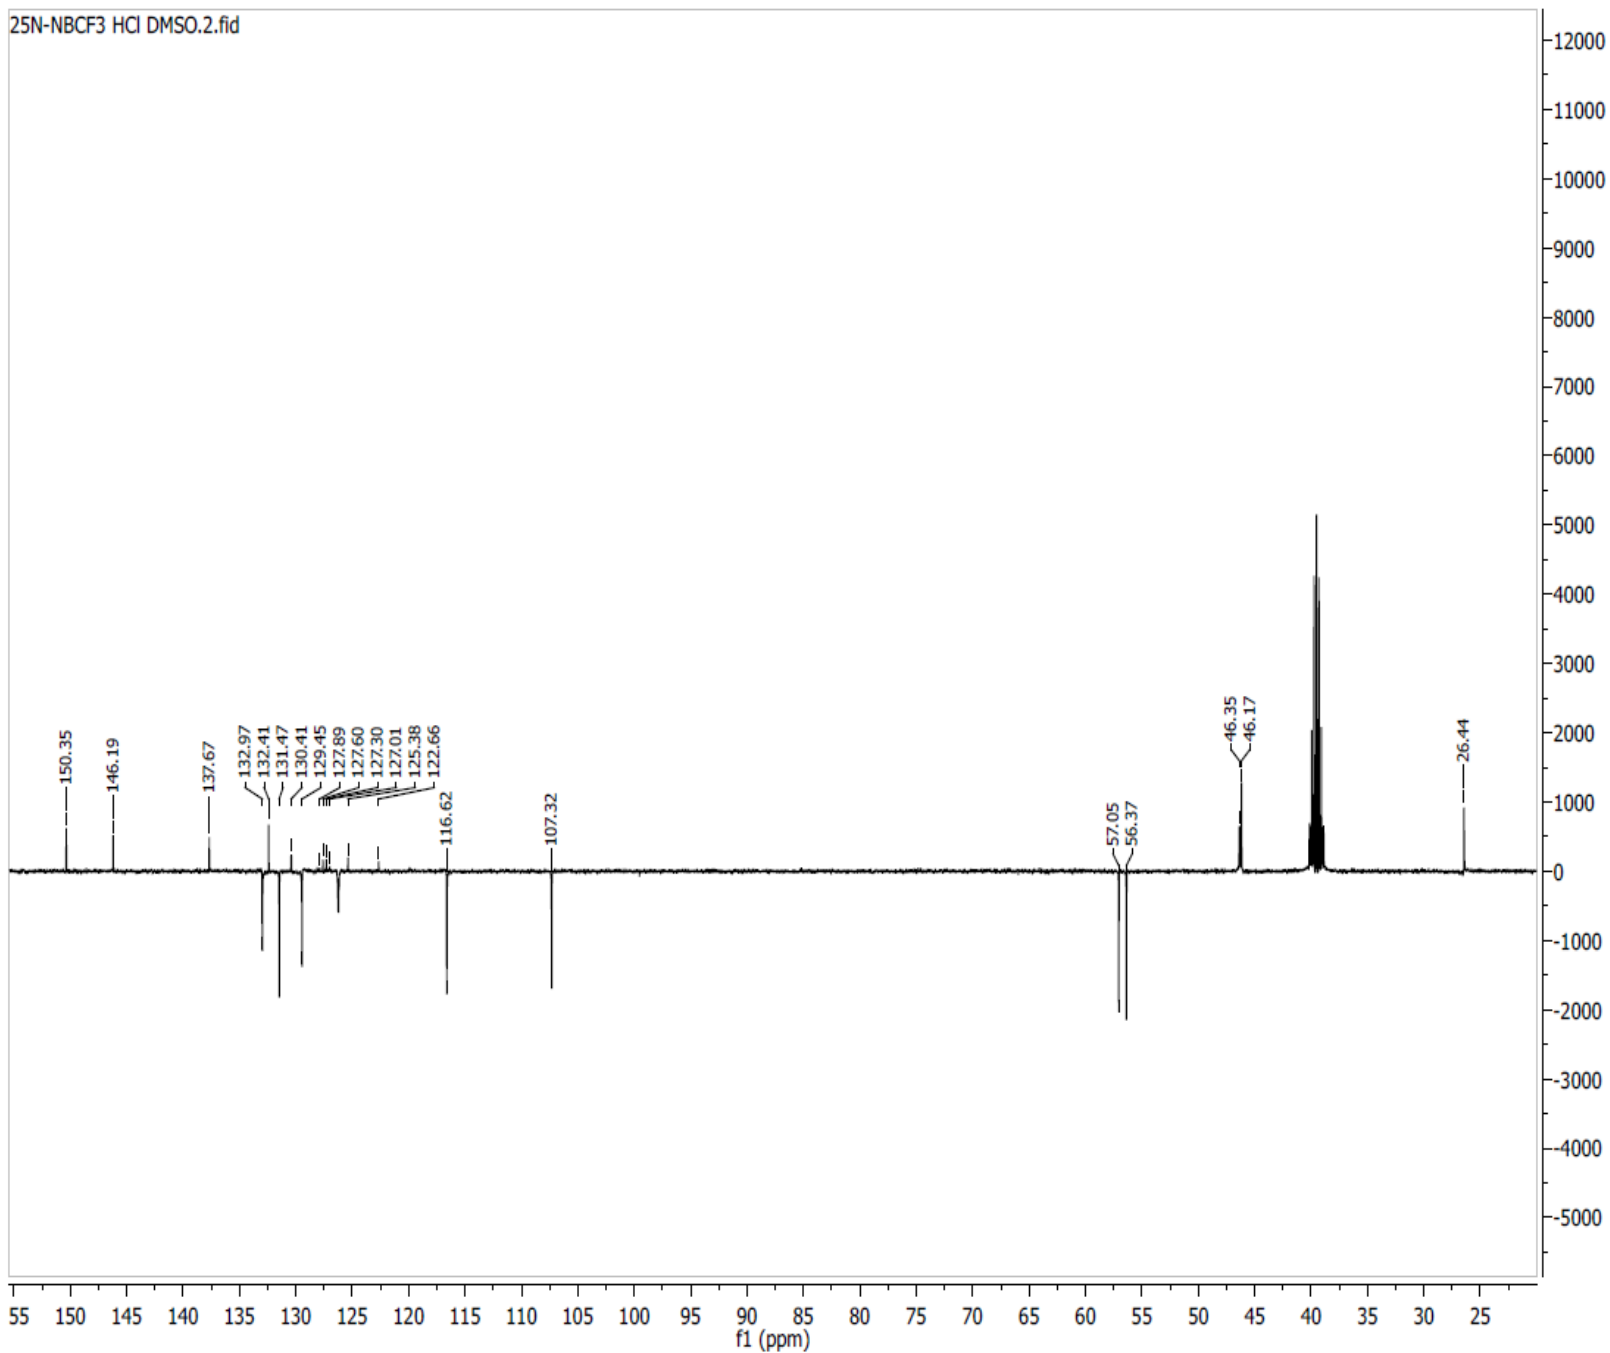

# Spectra 48. <sup>13</sup>C NMR of 25N-NBNO<sub>2</sub> (15) HCl

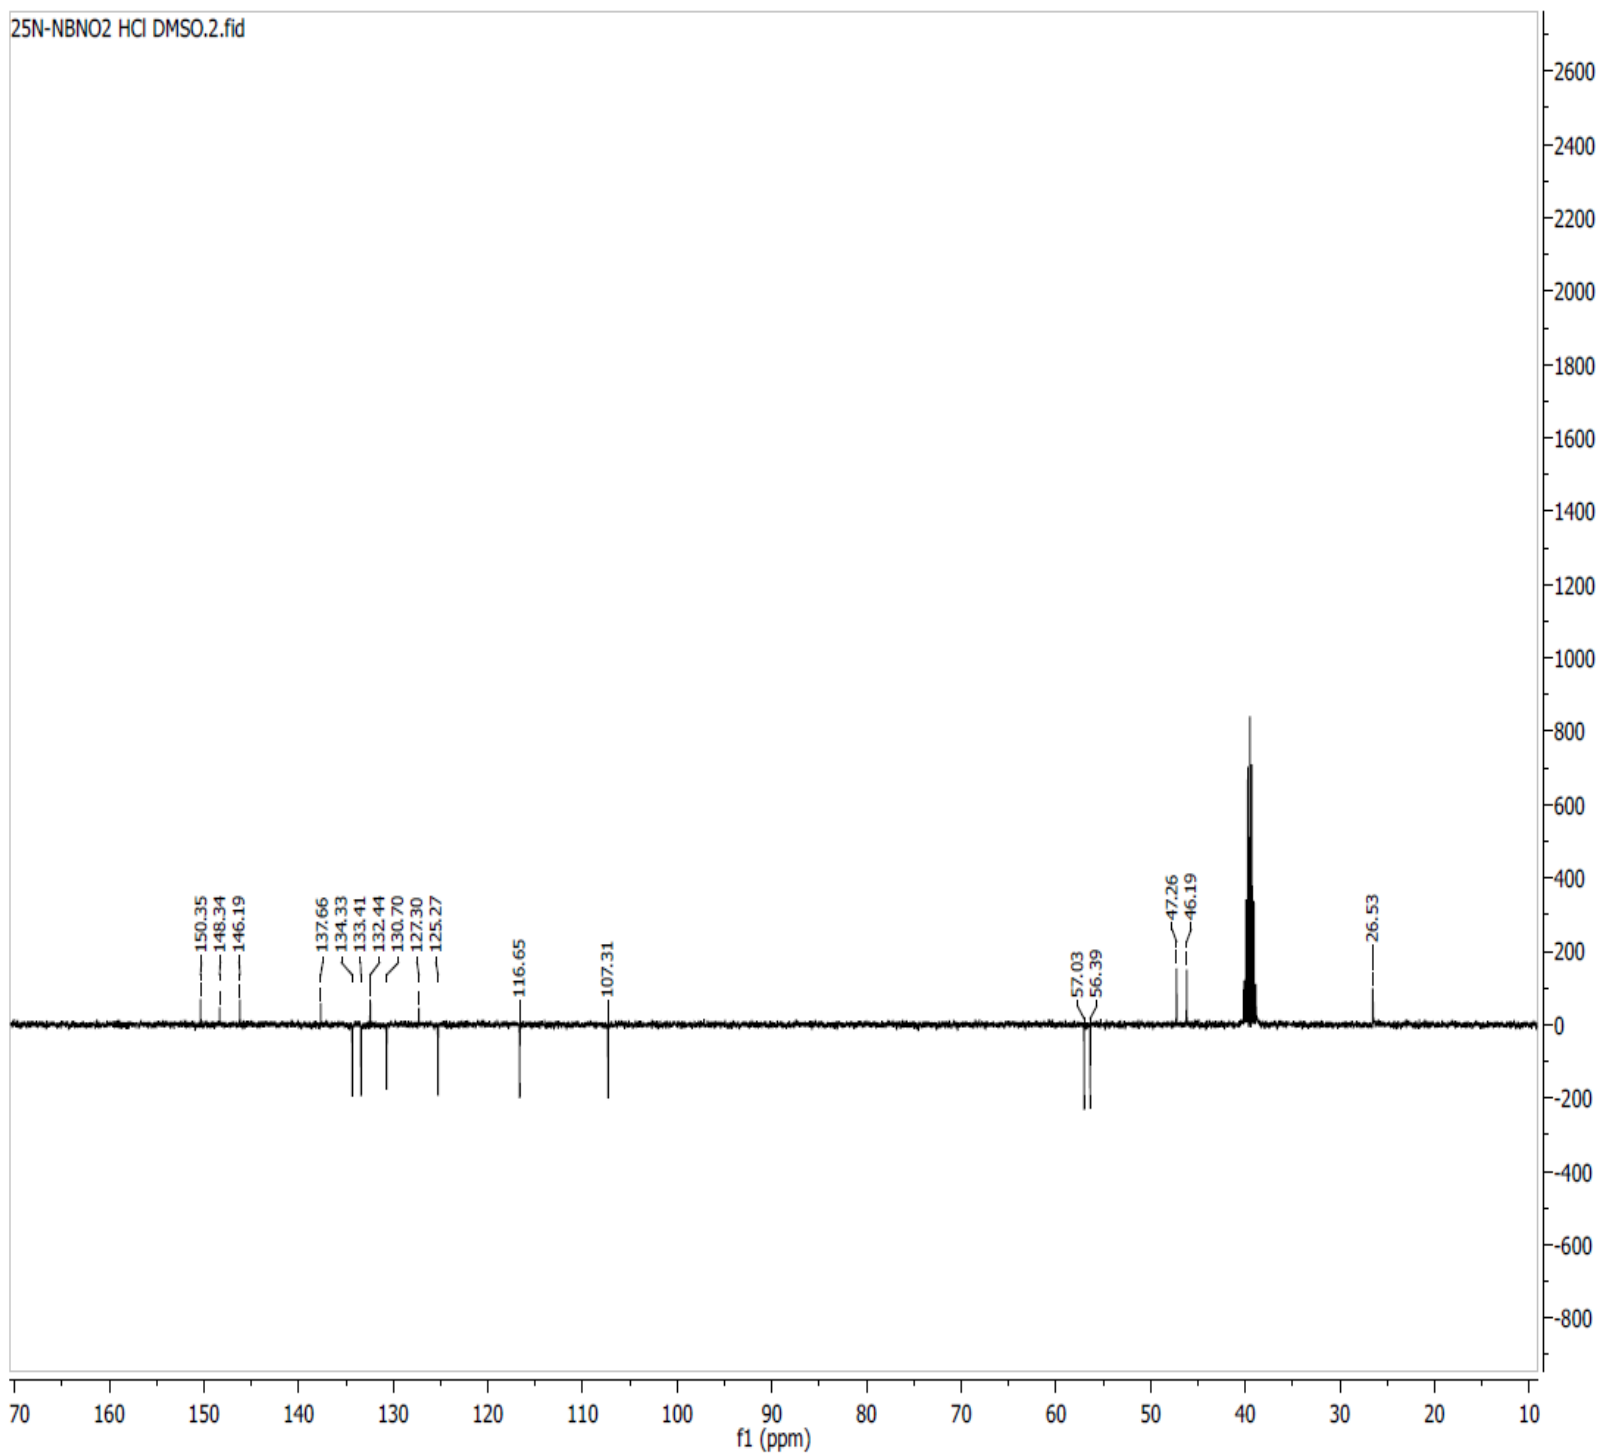



# Spectra 49. <sup>13</sup>C NMR of 25N-N1-Nap (16) HCl

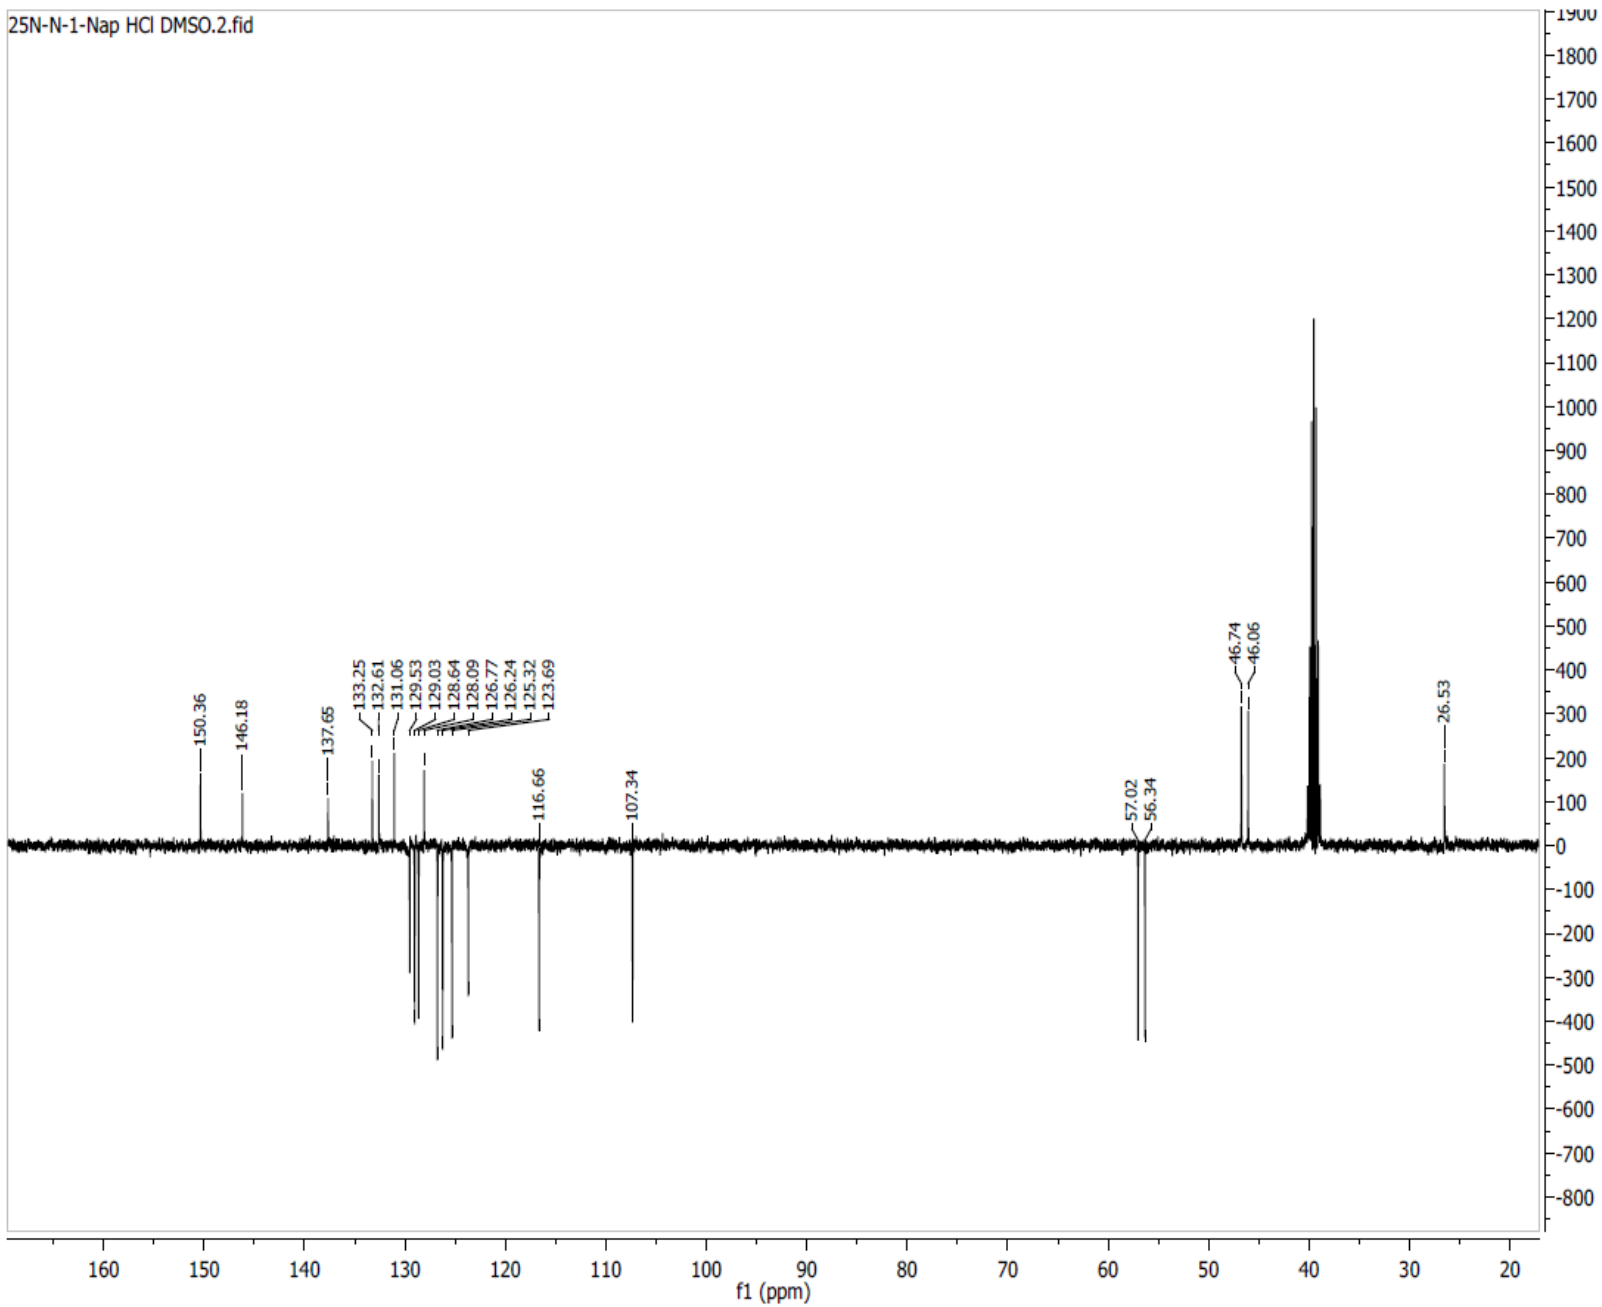

# Spectra 50. <sup>13</sup>C NMR of 25N-NBPh (17) HCl

25N-NBPh HCl

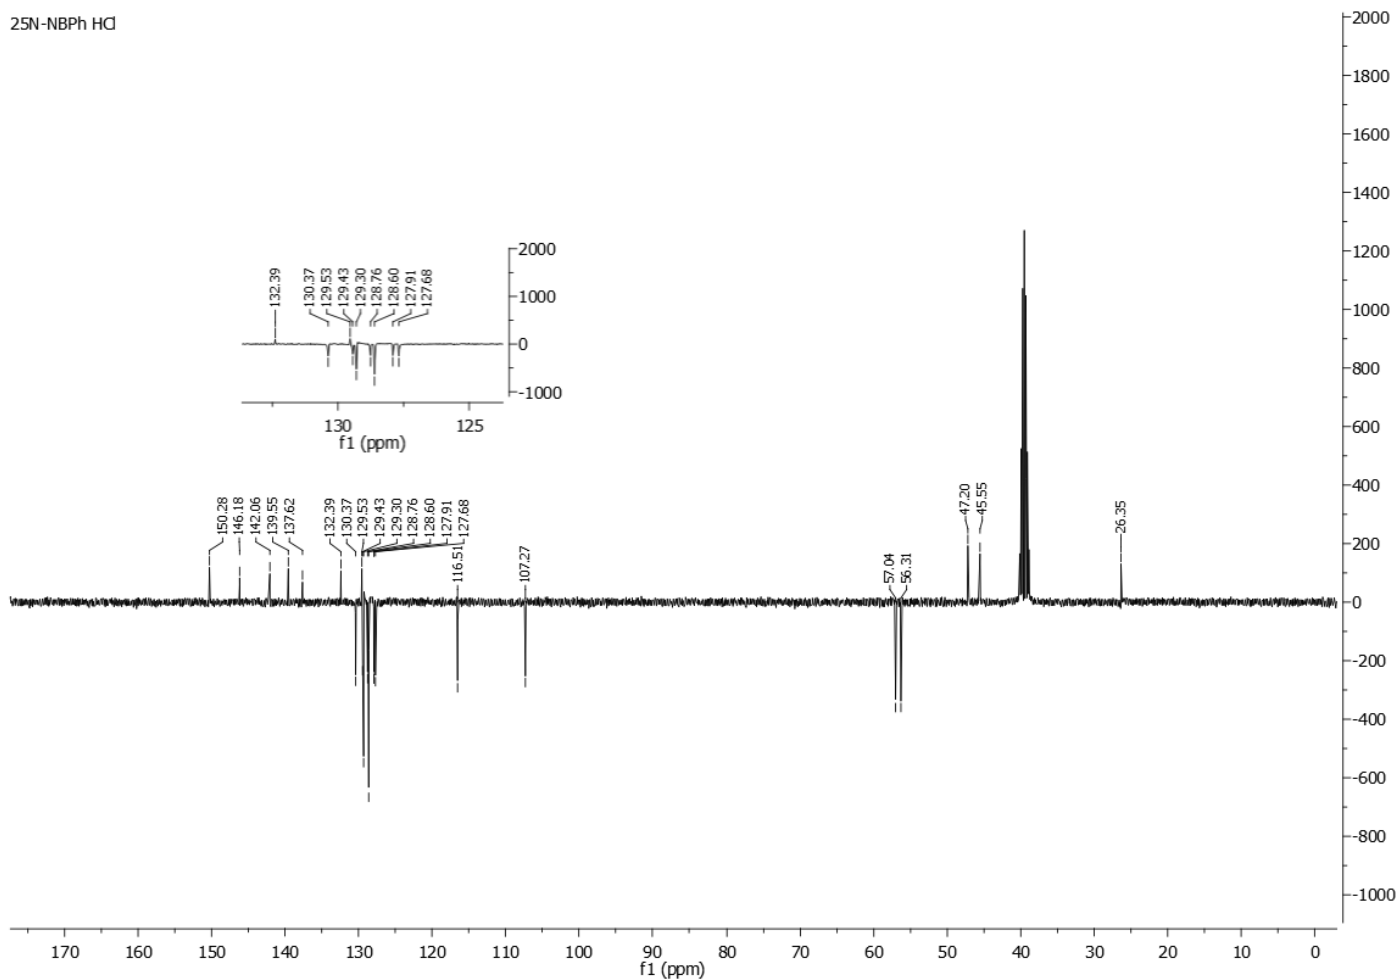

# Spectra 51. <sup>13</sup>C NMR of 25N-NB-2-OH-3-Me (18) HCl

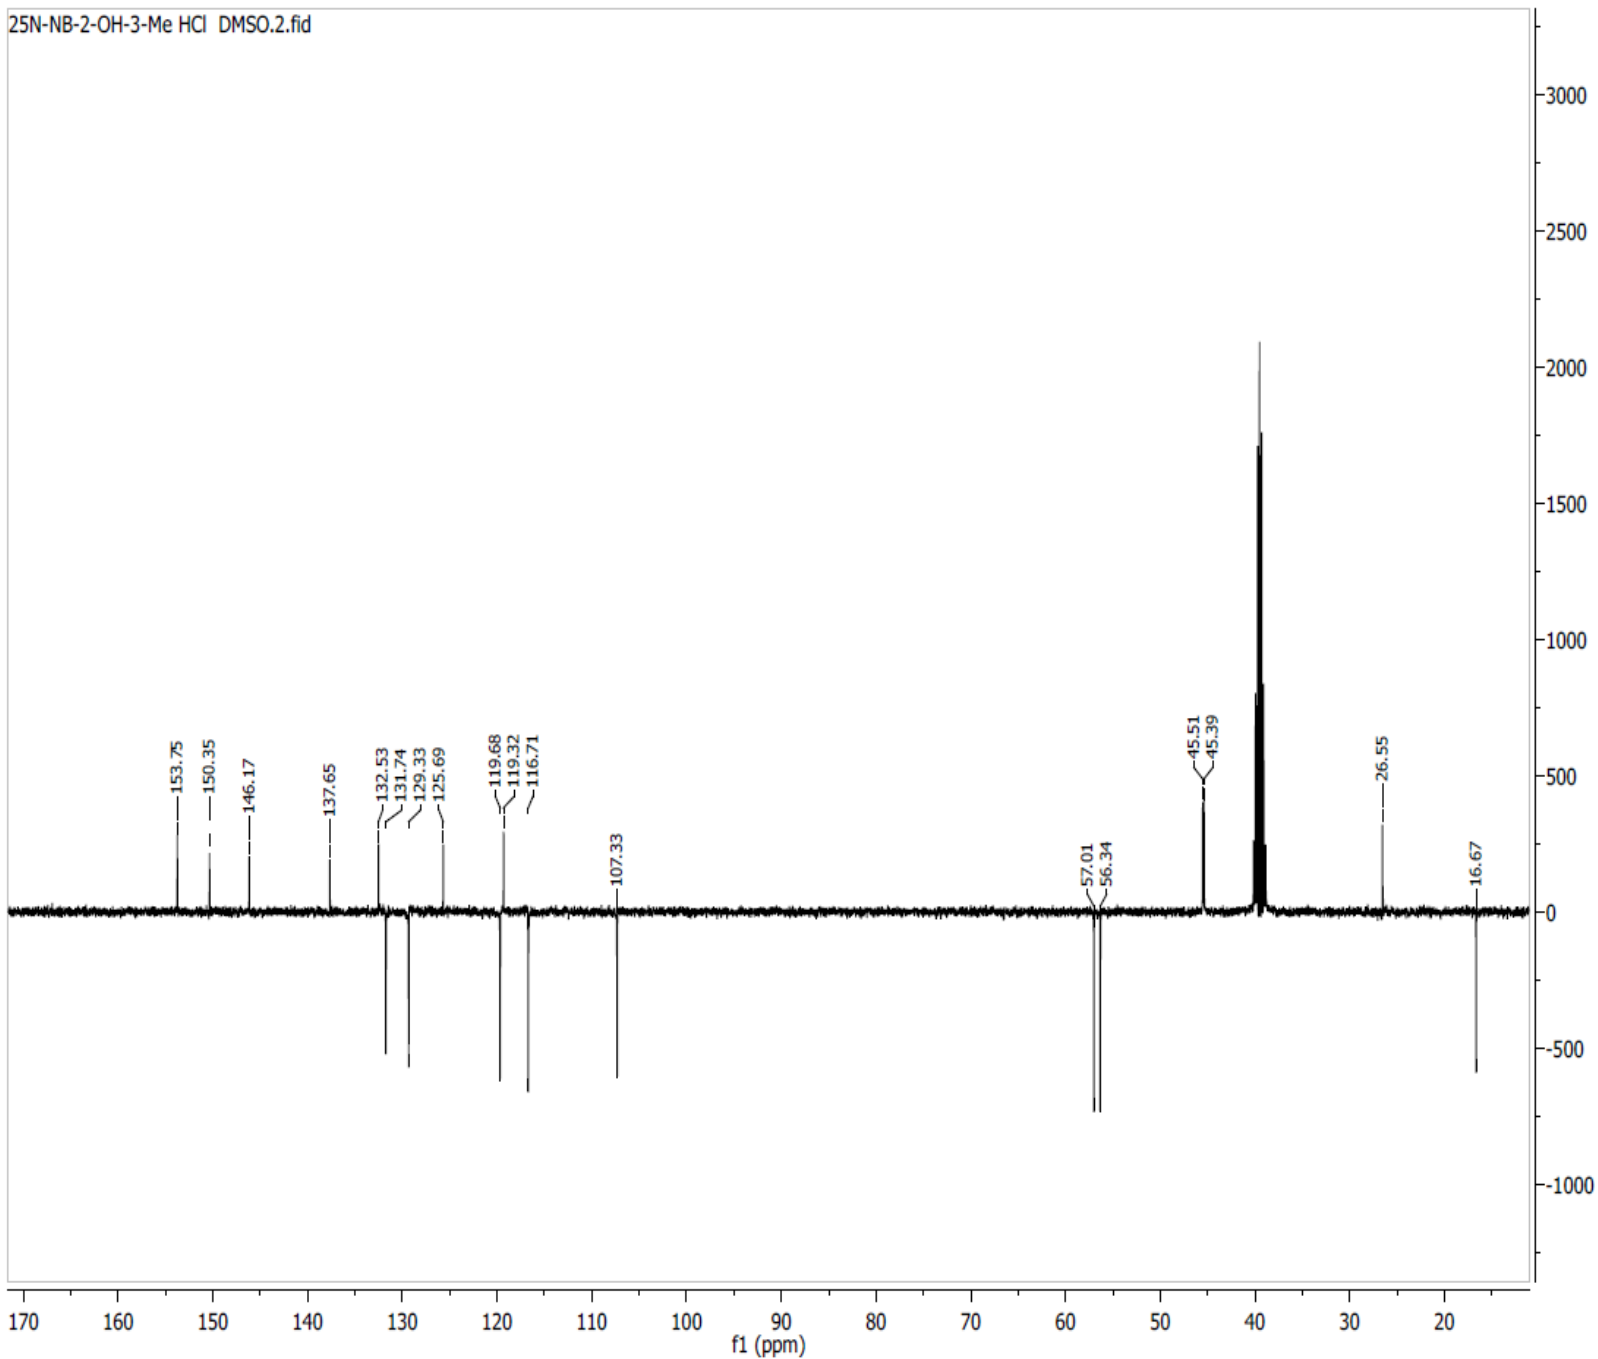

# Spectra 52. <sup>13</sup>C NMR of 25N-NB-2-MeO-3-F (19) HCl

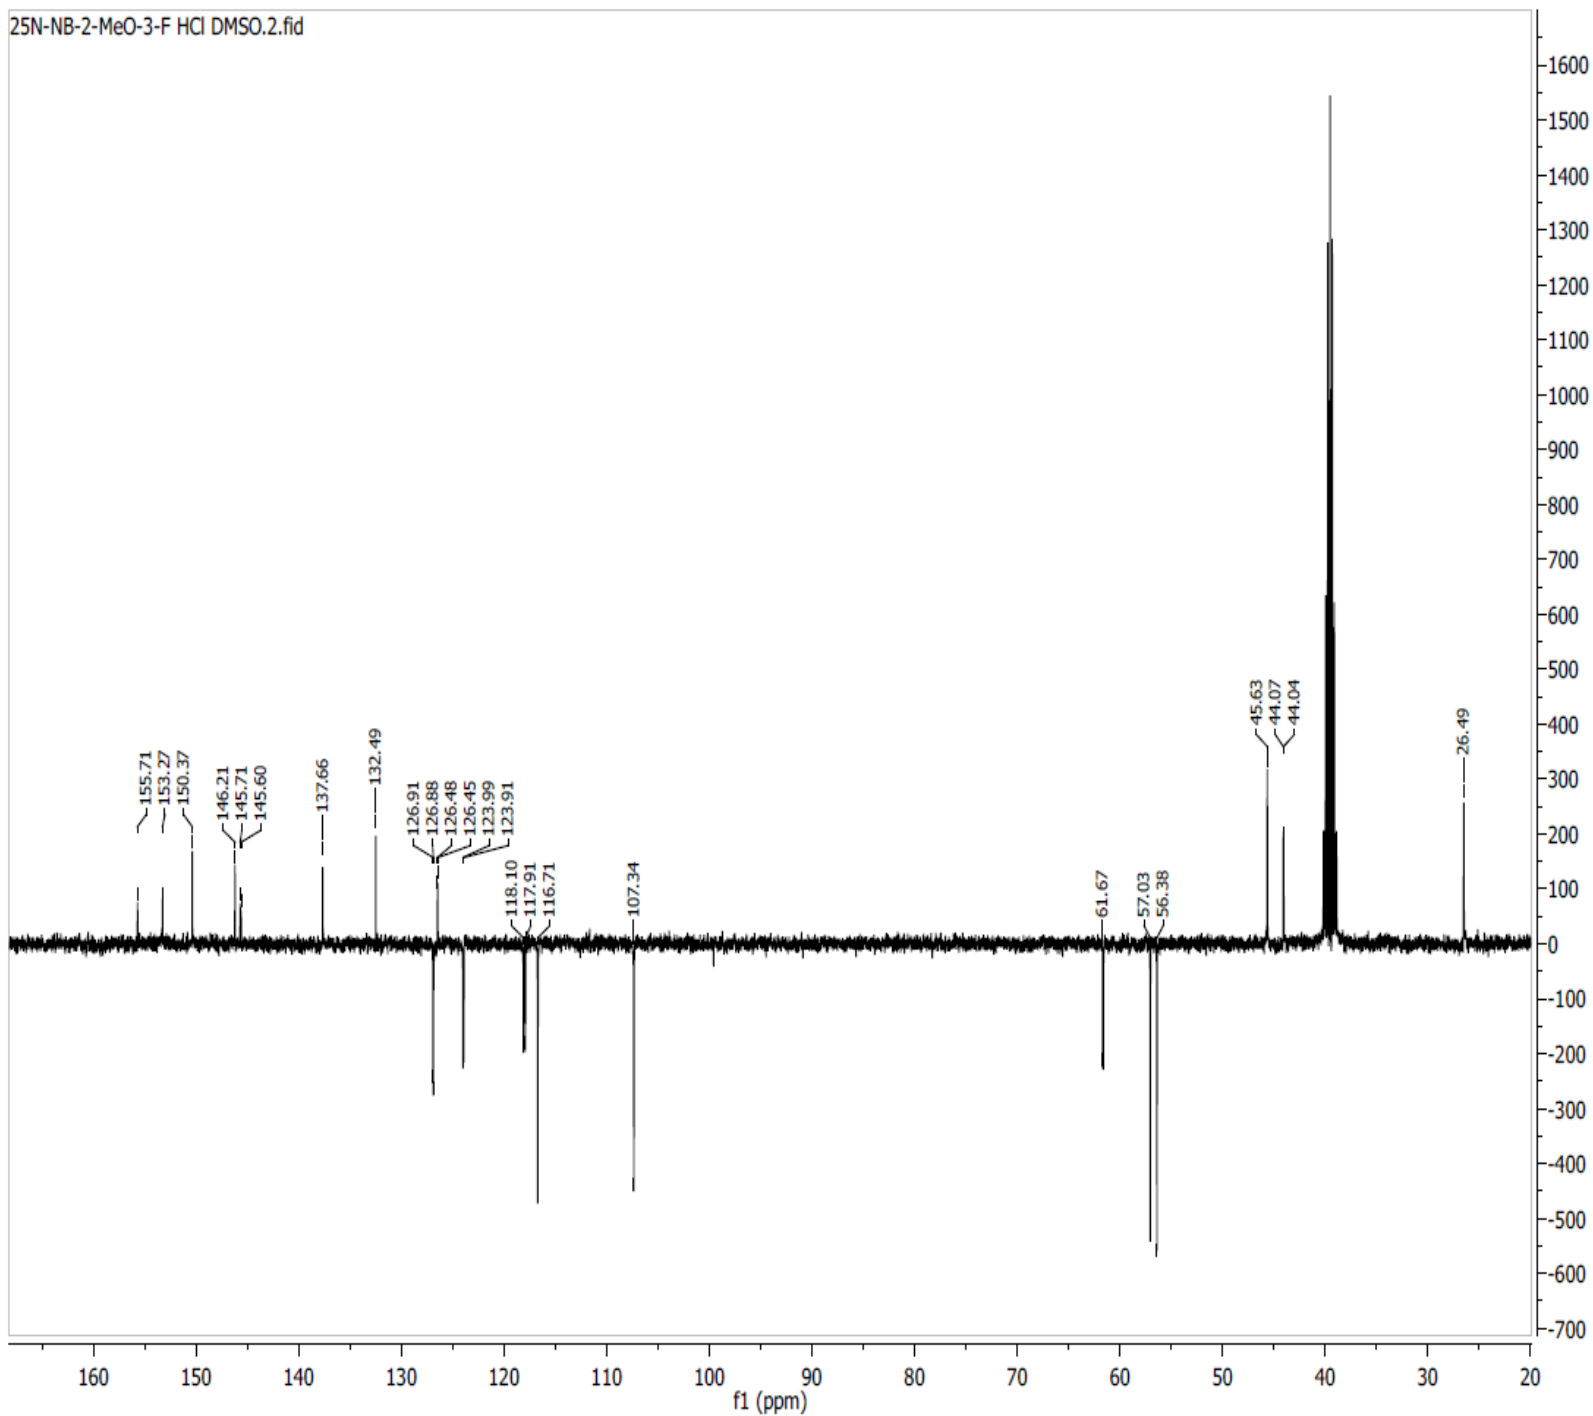

# Spectra 53. <sup>13</sup>C NMR of 25N-NB-2,5-DiMeO (20) HCl

25N-NB-2,5-DiMeO HCl DMSO.2.fid

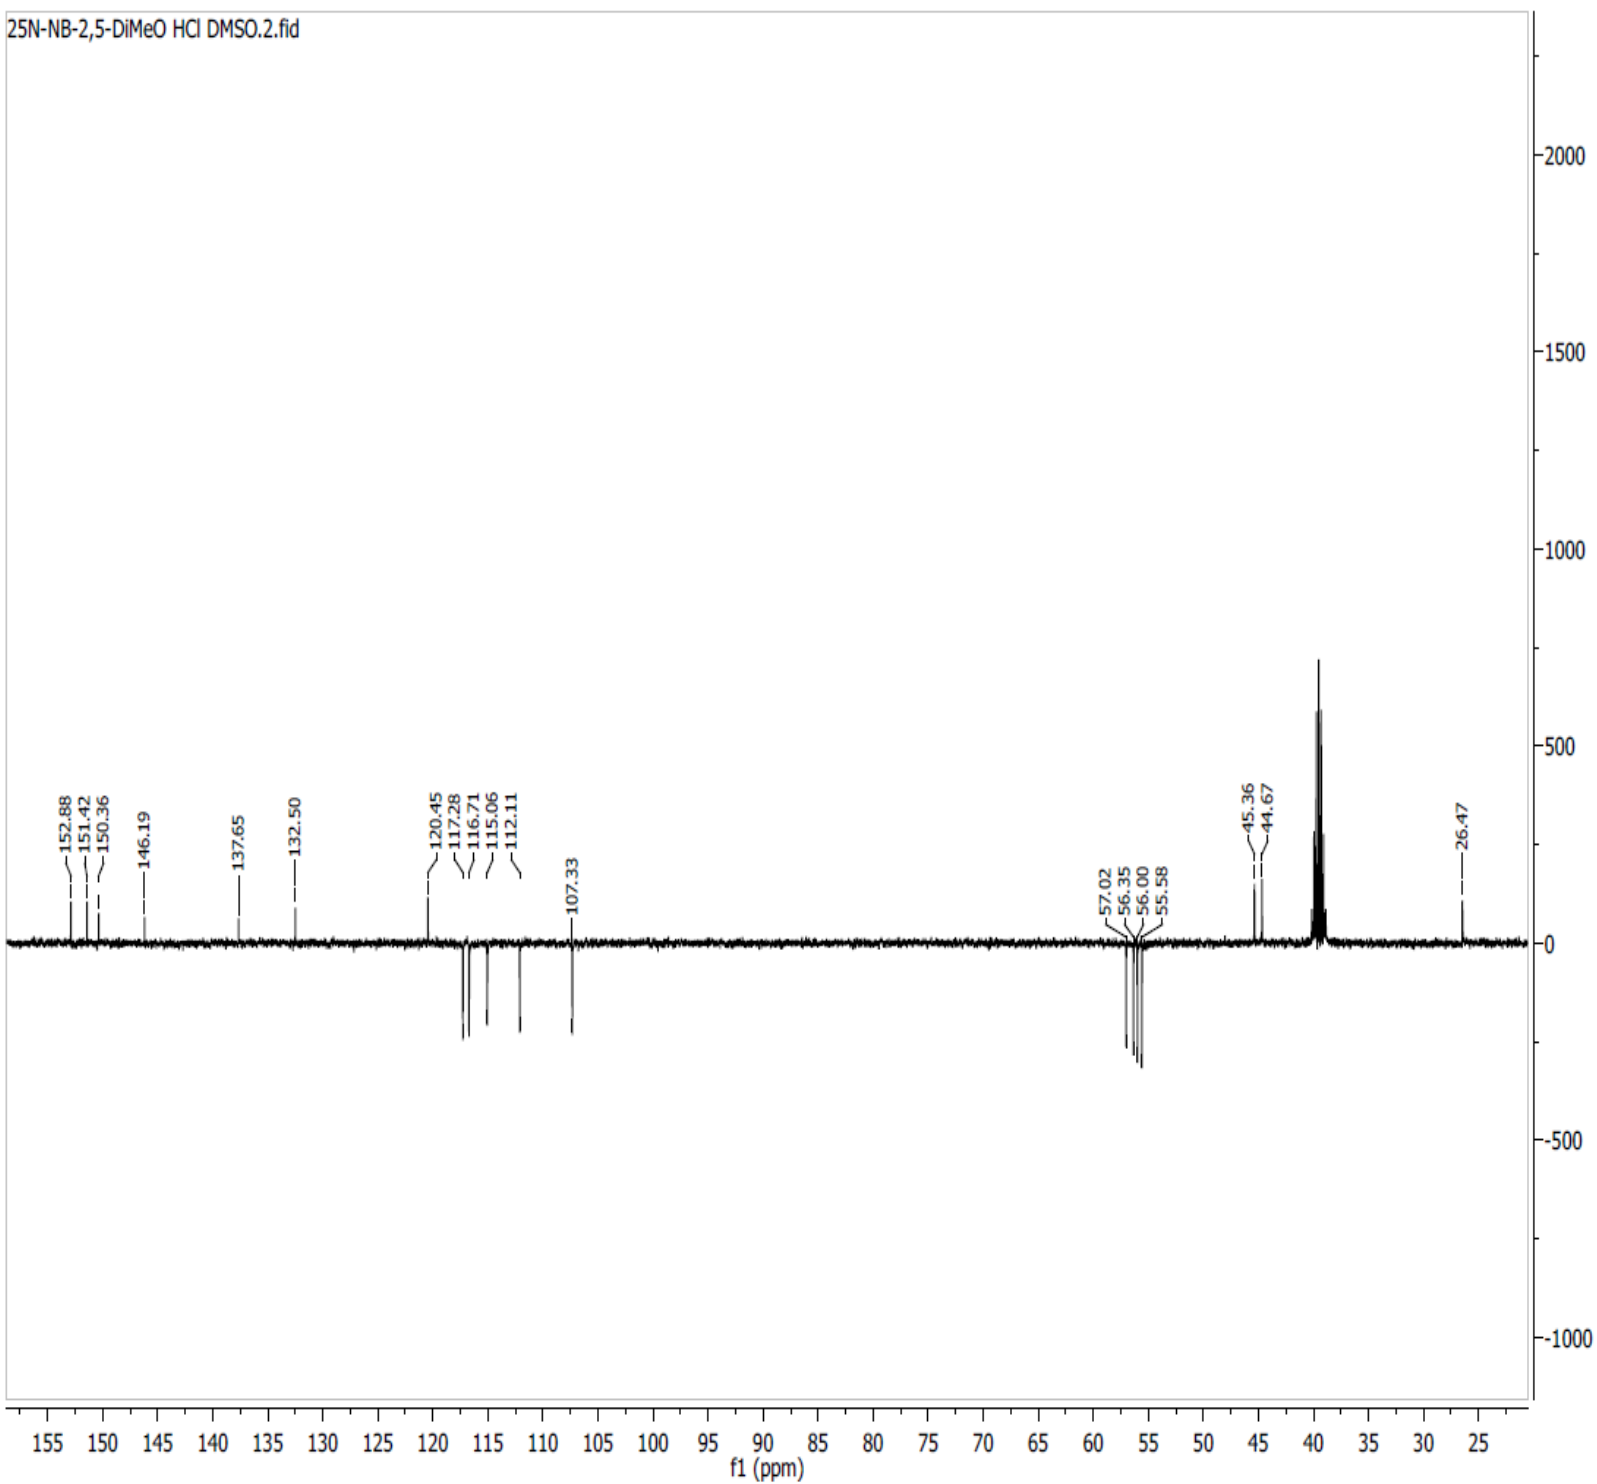

# Spectra 54. <sup>13</sup>C NMR of 25N-NB-3-OH (21) HCl

25N-NB-3-OH HCl

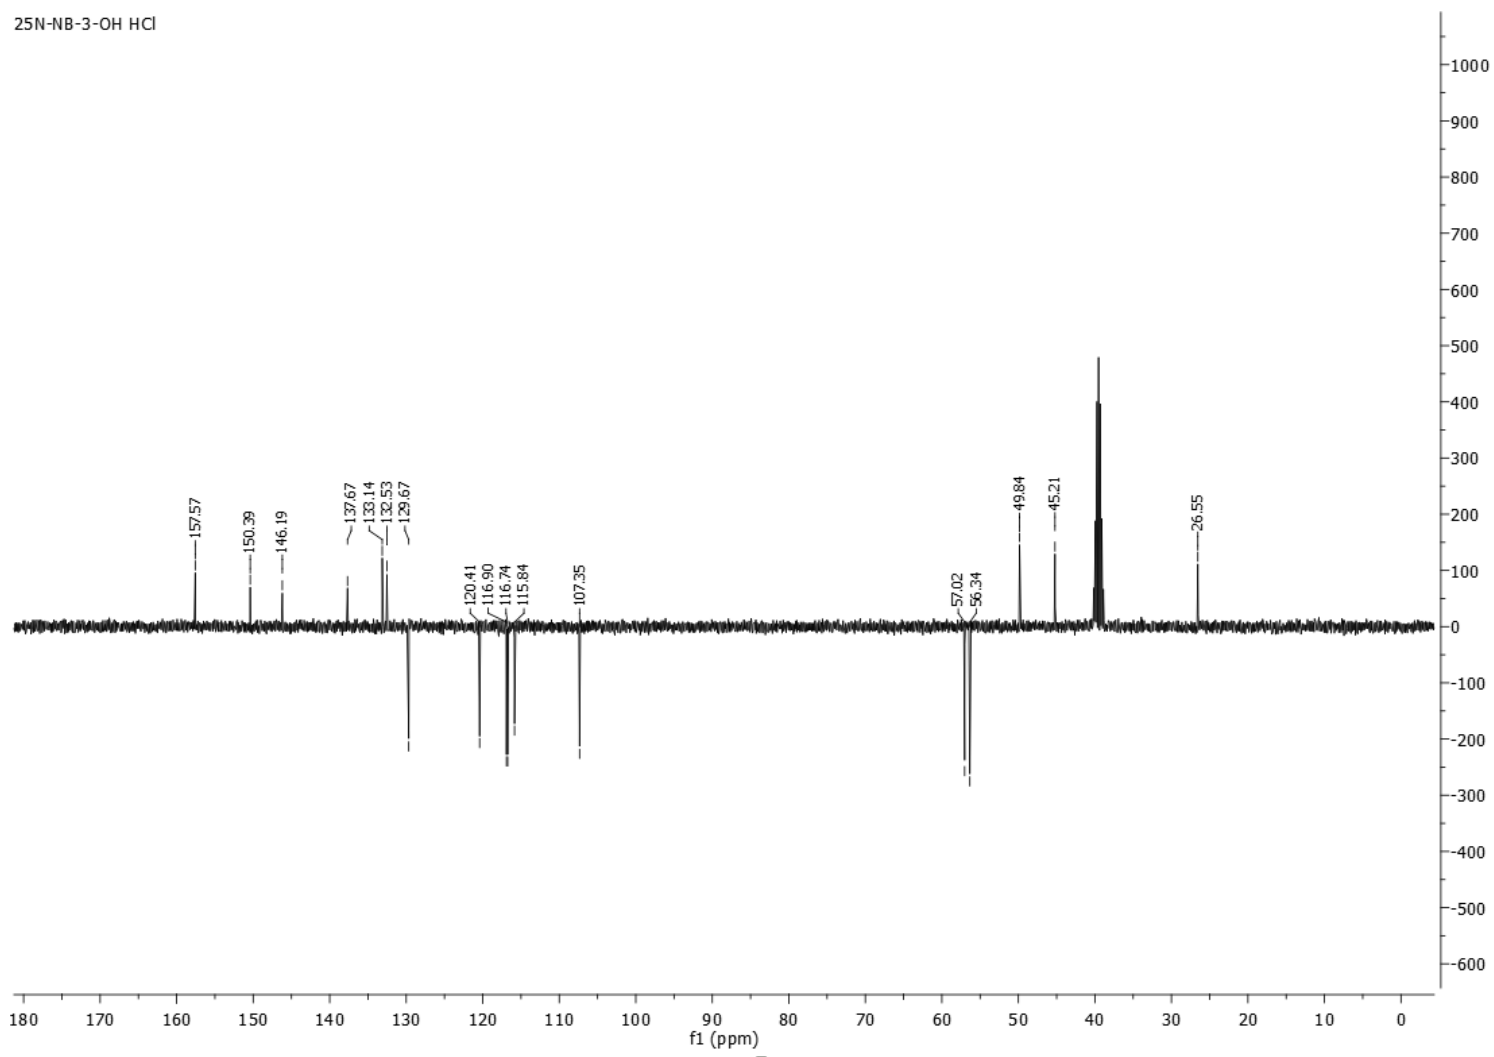

# Spectra 55. <sup>13</sup>C NMR of 25N-NB-3-Me (22) HCl

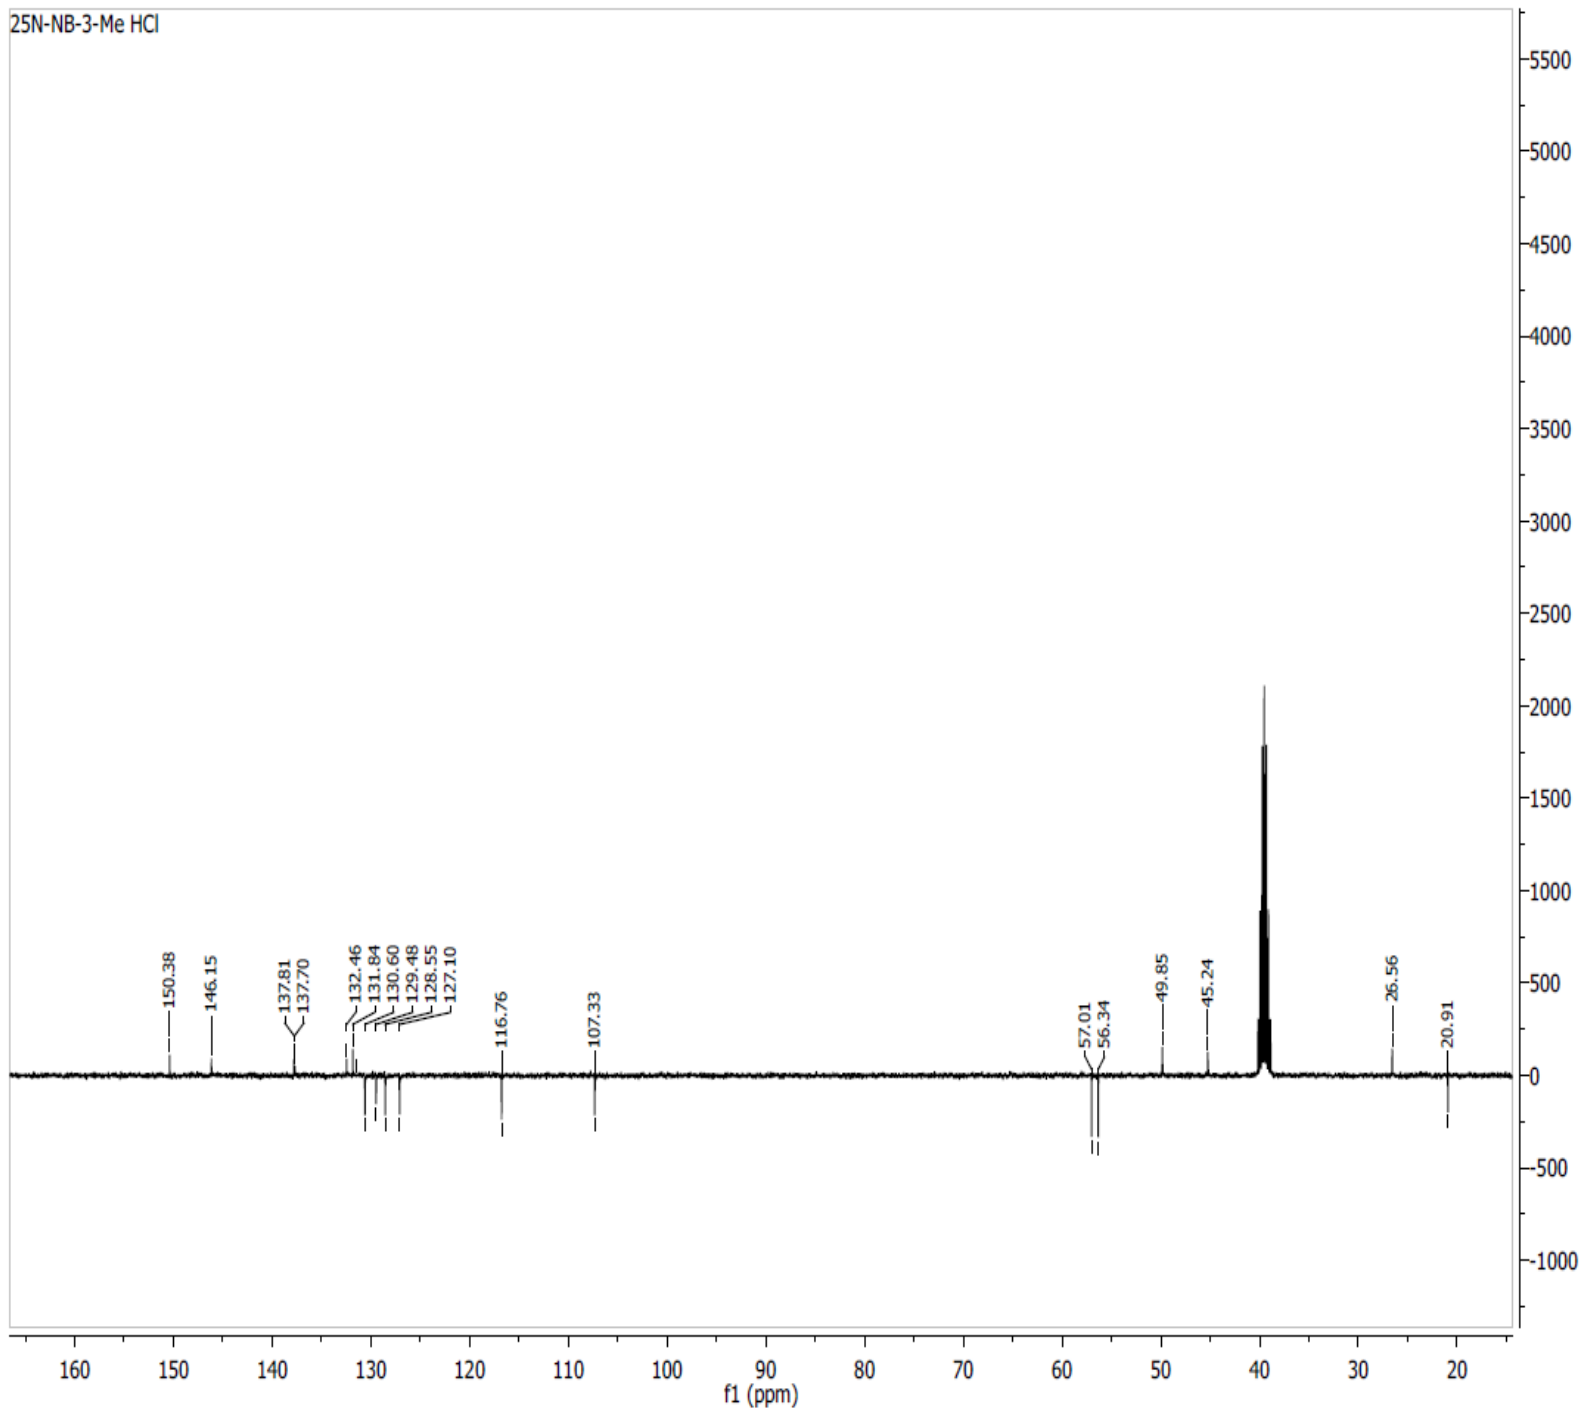

# Spectra 56. <sup>13</sup>C NMR of 25N-NB-4-Me (23) HCl

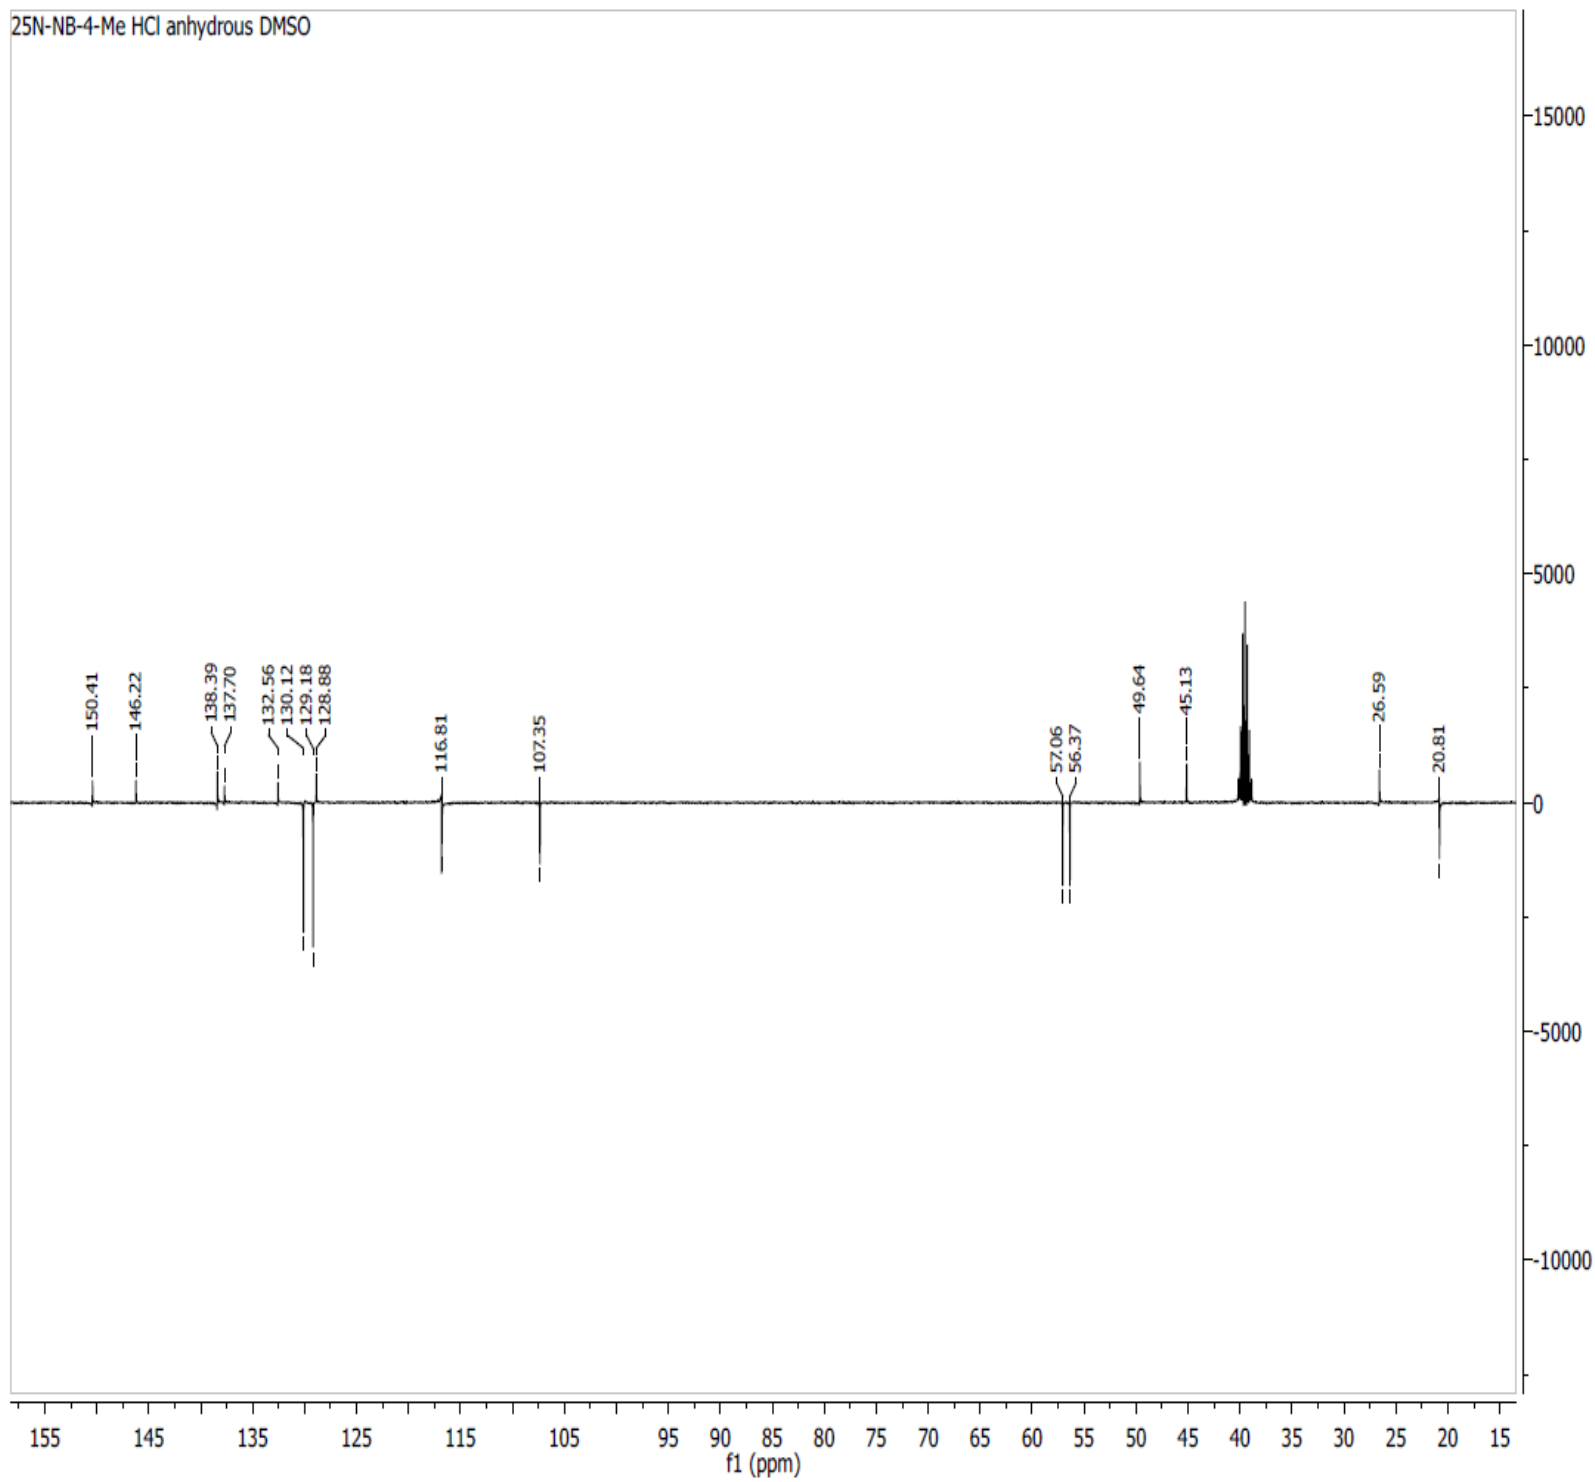



# Spectra 57. <sup>13</sup>C NMR of 25N-NB-3-F (24) HCl

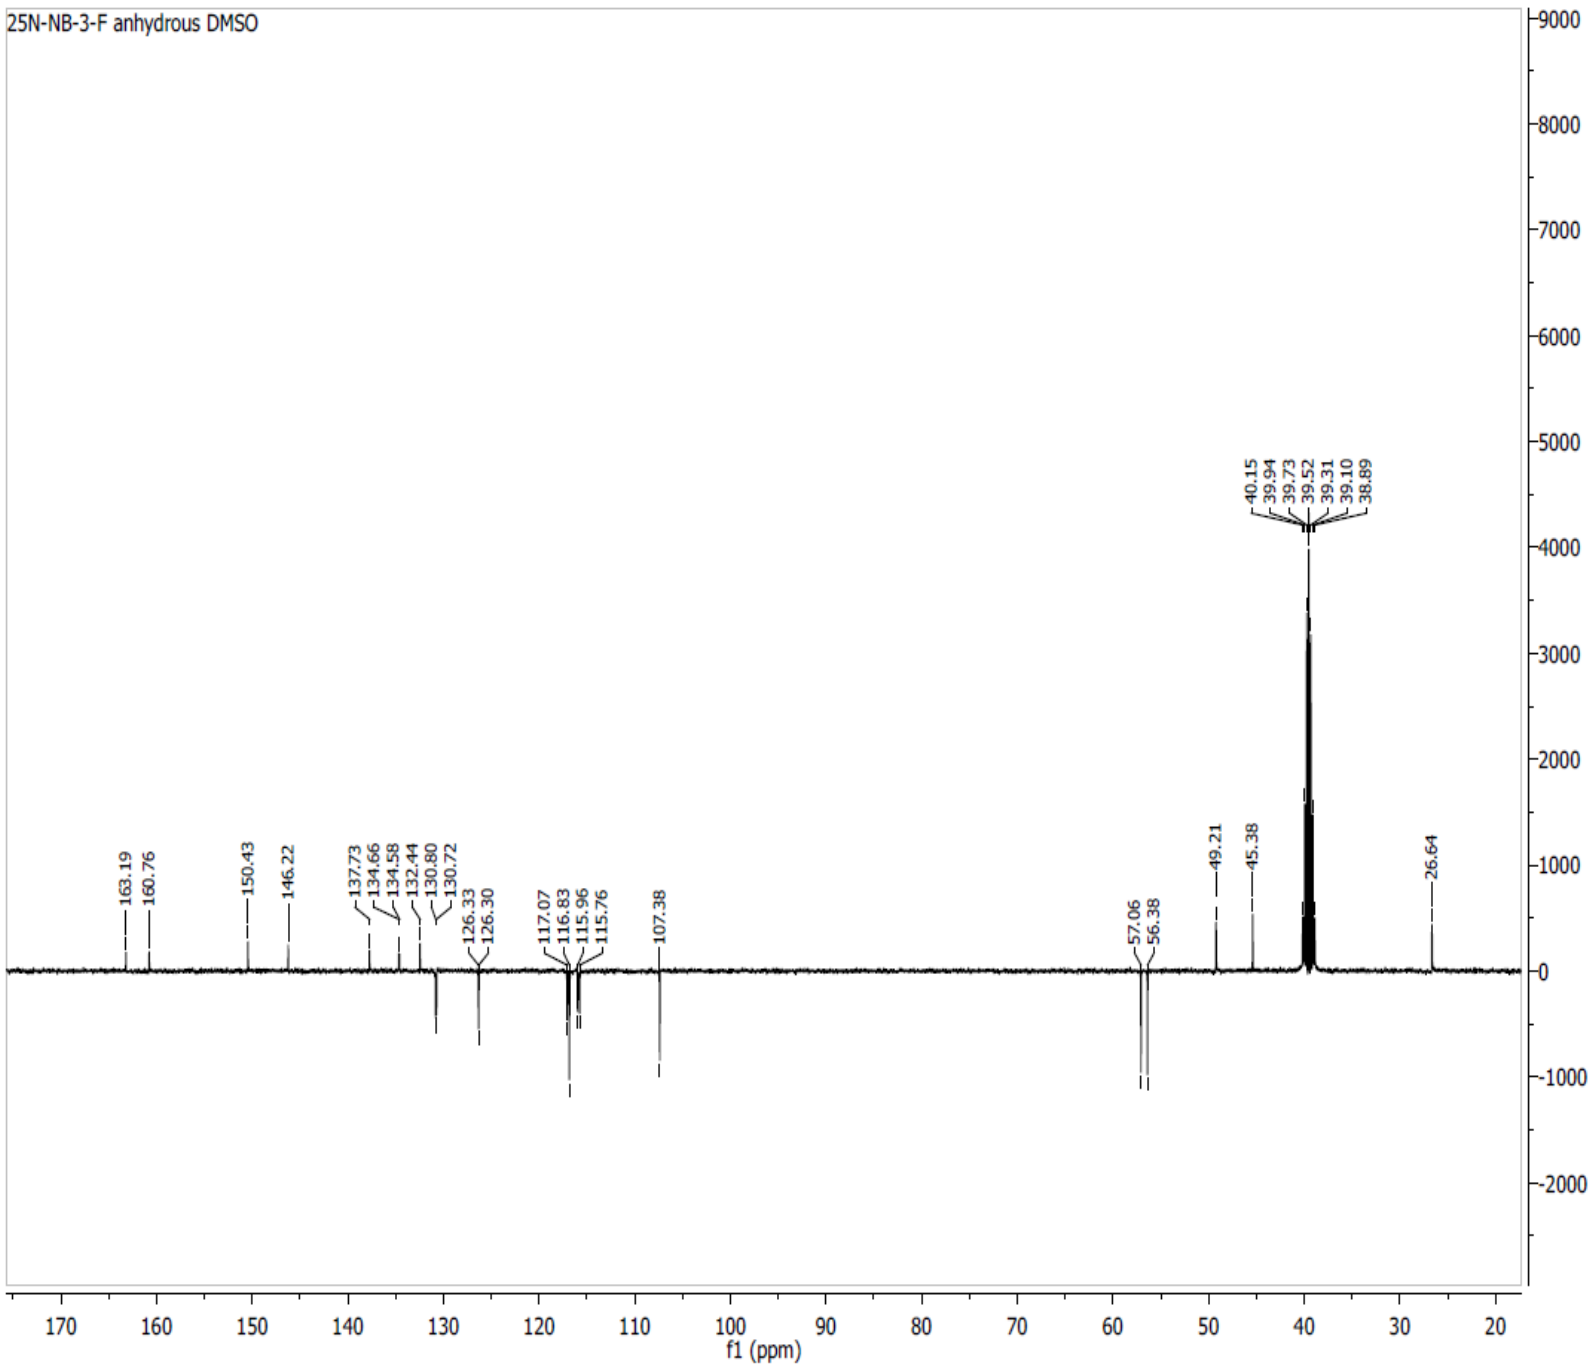

# Spectra 58. <sup>13</sup>C NMR of 25N-NB-4-F (25) HCl

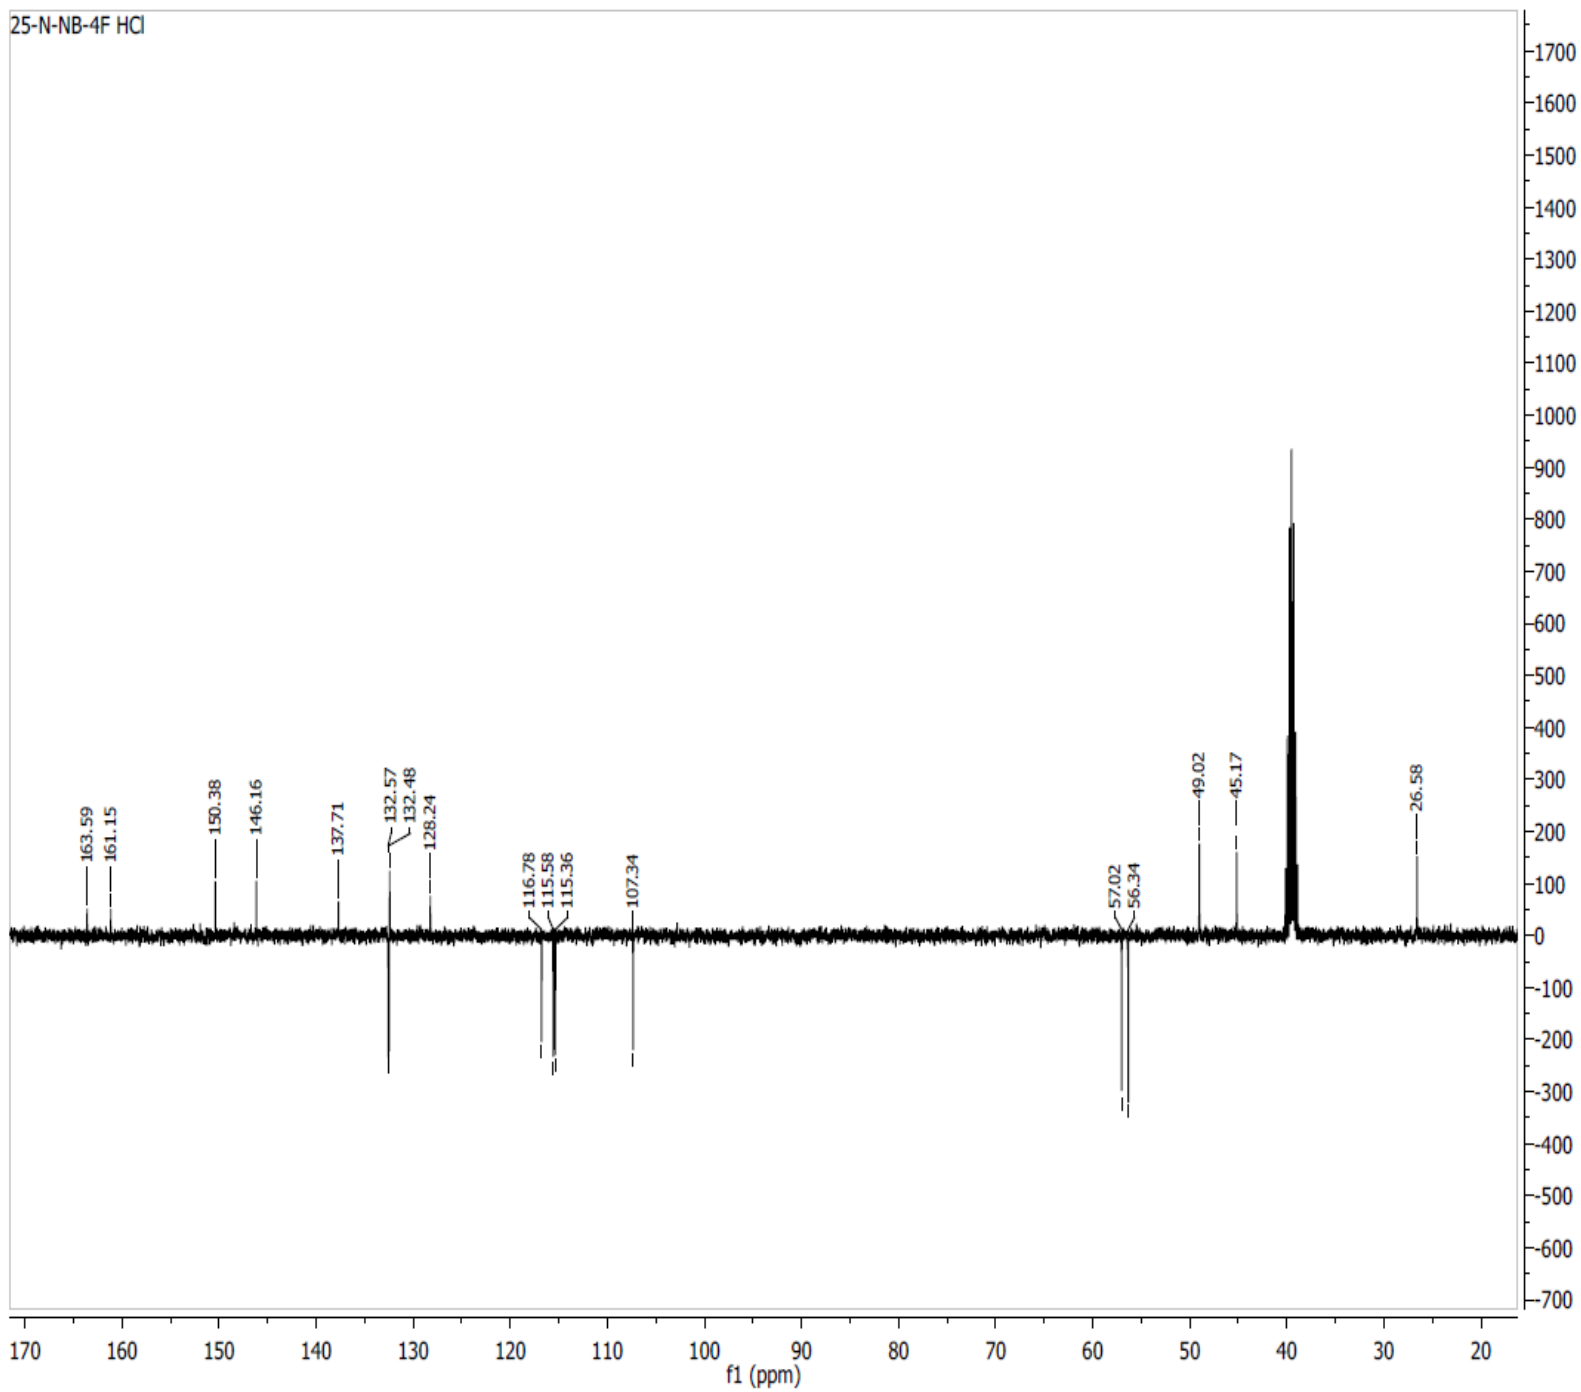

# Spectra 59. <sup>13</sup>C NMR of 25D-N1-Nap (26) HCl

25D-N1-Nap HCl

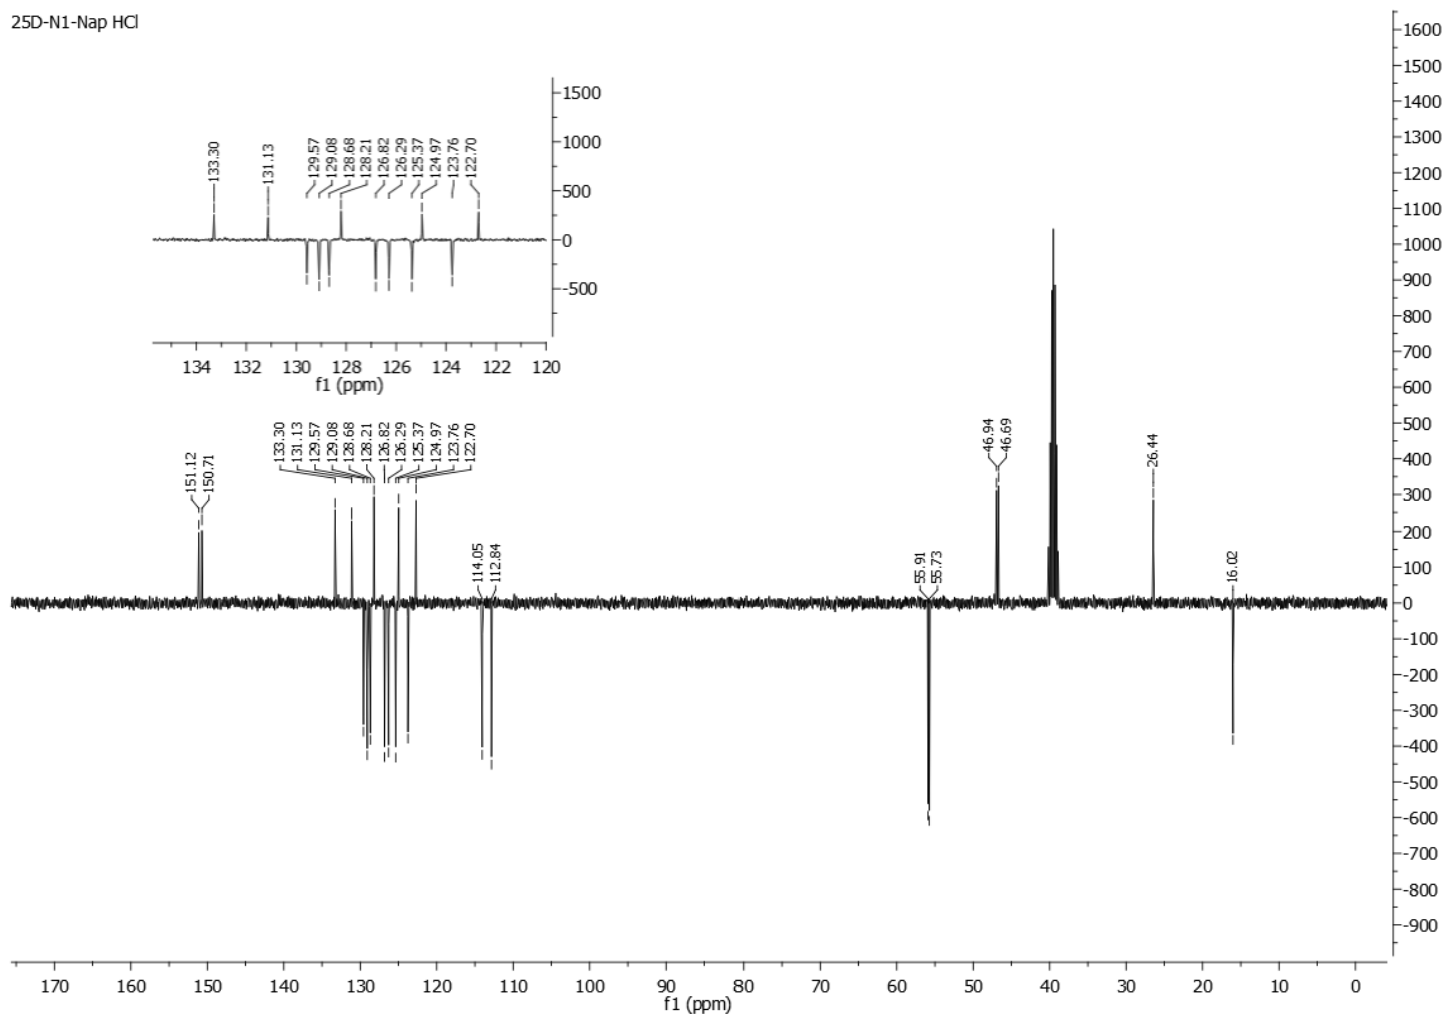

# Spectra 60. <sup>13</sup>C NMR of 25D-NBPh (27) HCl

25D-NBPh HCl

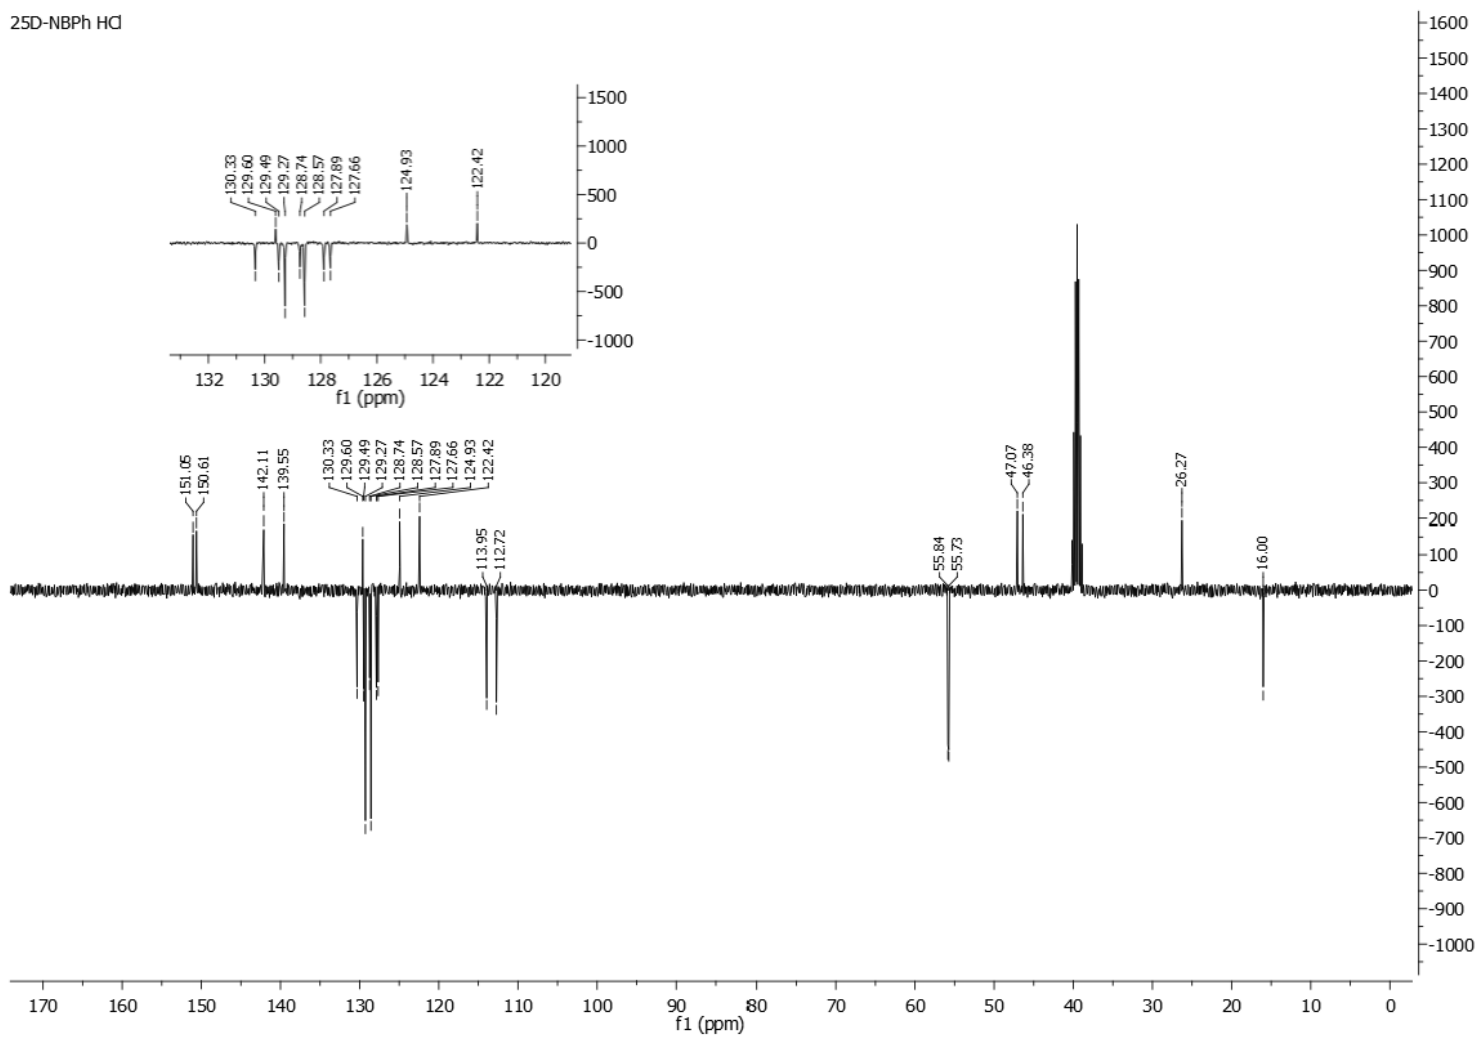

# Spectra 61. <sup>13</sup>C NMR of 25O-N1-Nap (28) HCl

25O-N1-Nap HCl

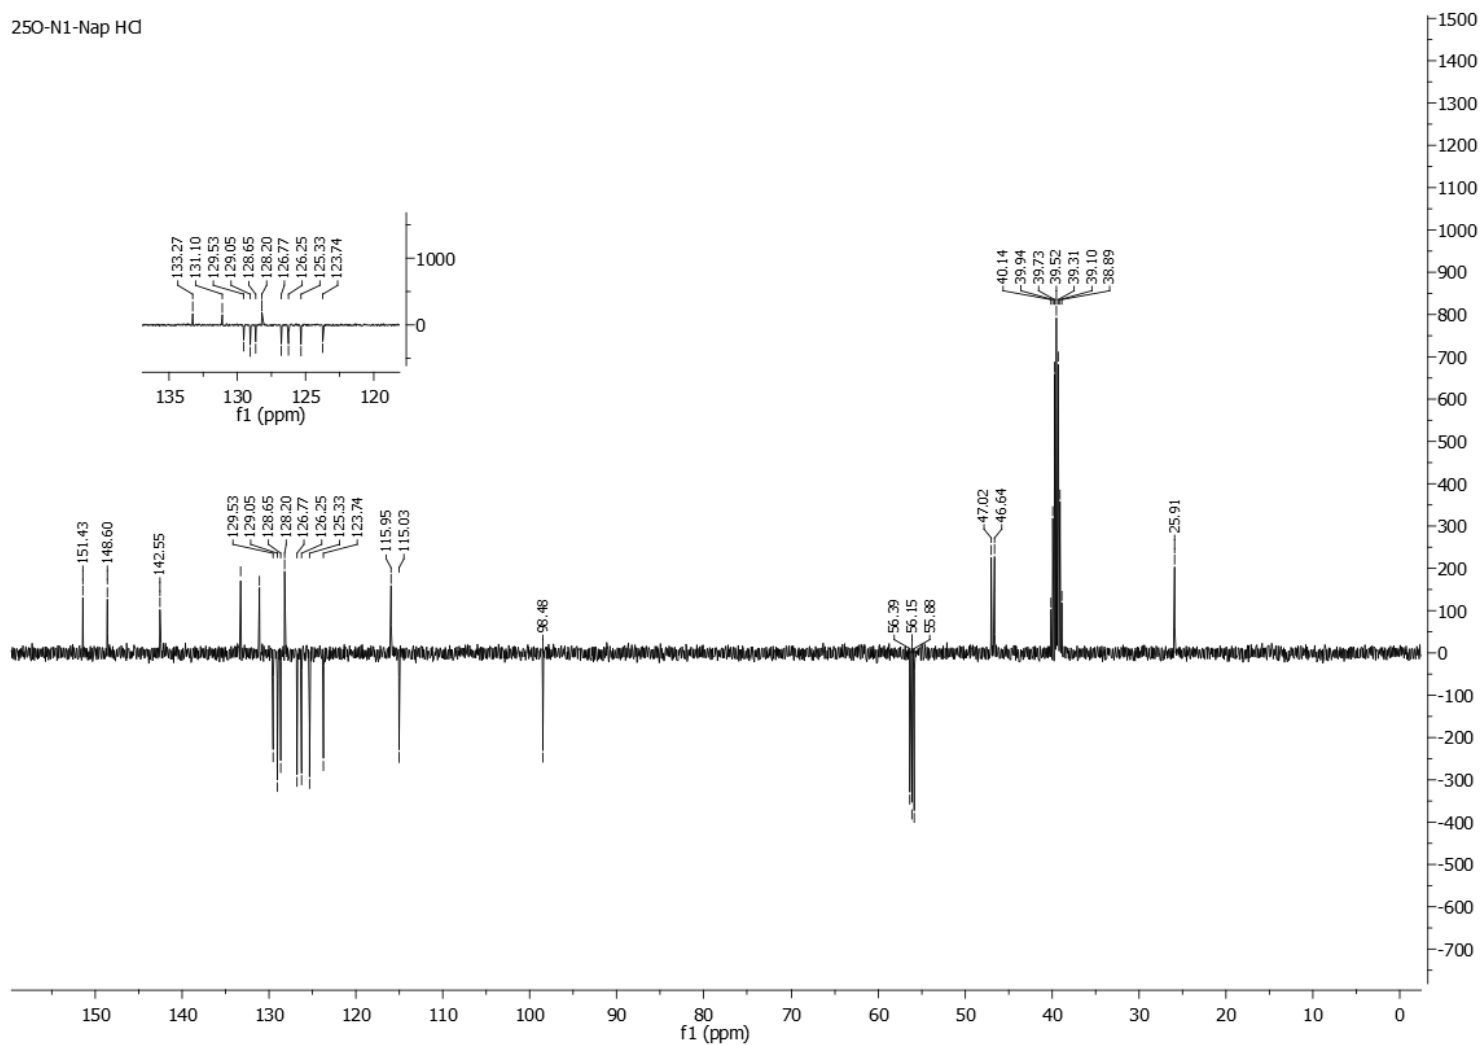

# Spectra 62. <sup>13</sup>C NMR spectrum of 2C2-N1-Nap (29) HCl

2C2-N1-Nap HCl

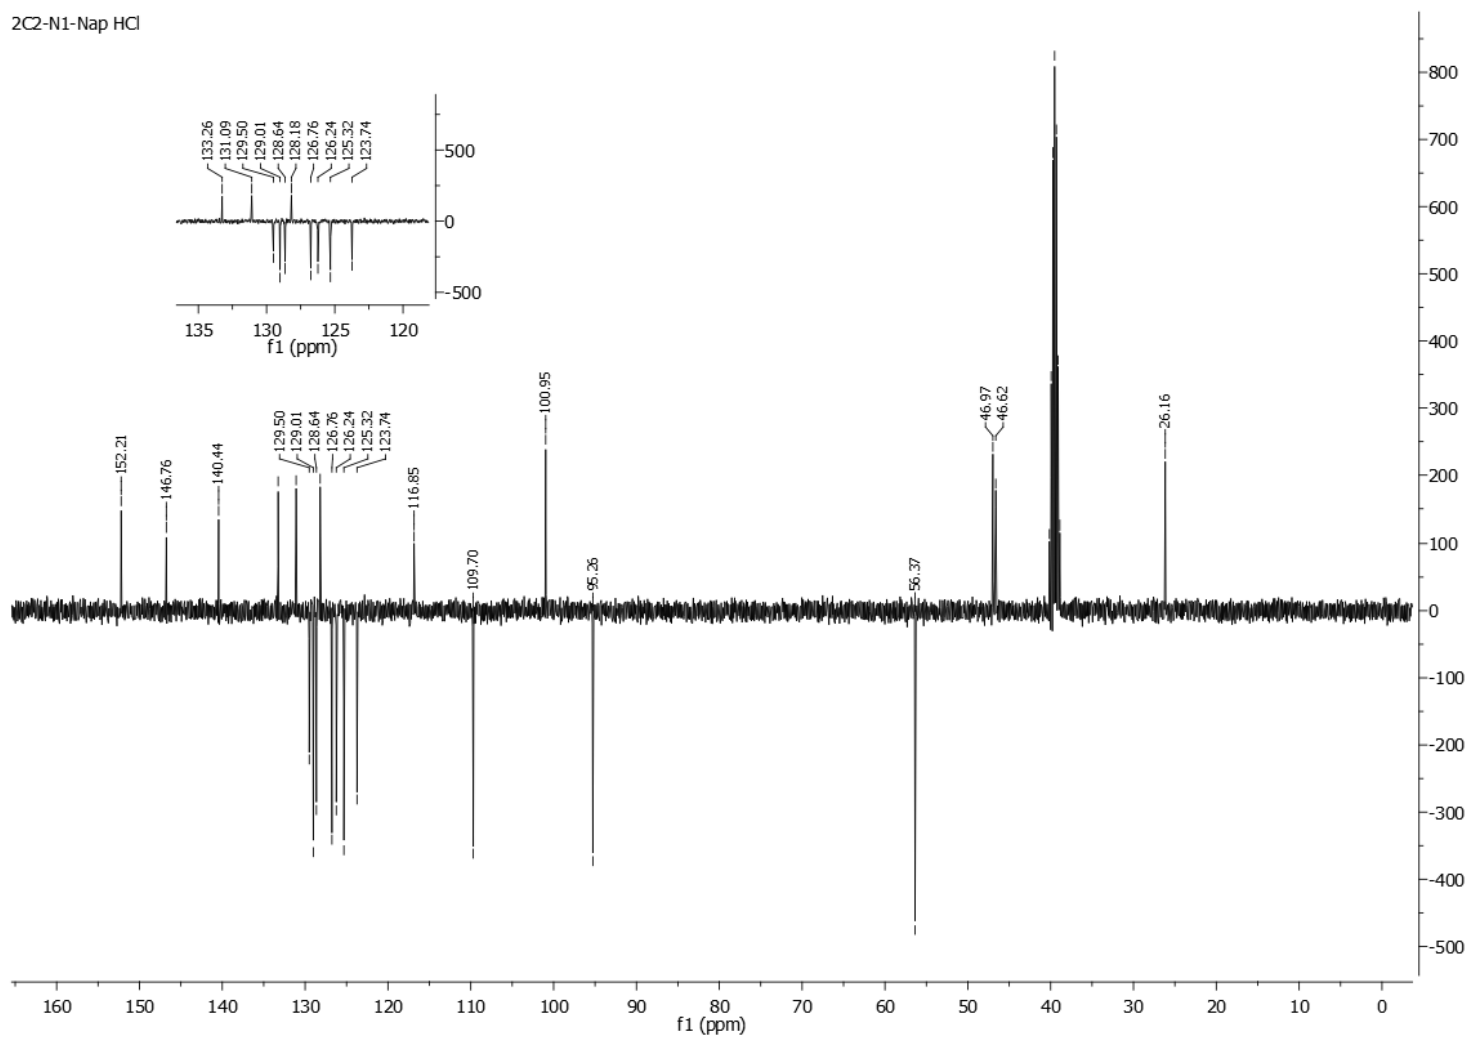

# Spectra 63. <sup>13</sup>C NMR spectrum of Ψ-DOB-N1-Nap (30) HCl

psi-DOB-N1-NAP-HCl.11.fid

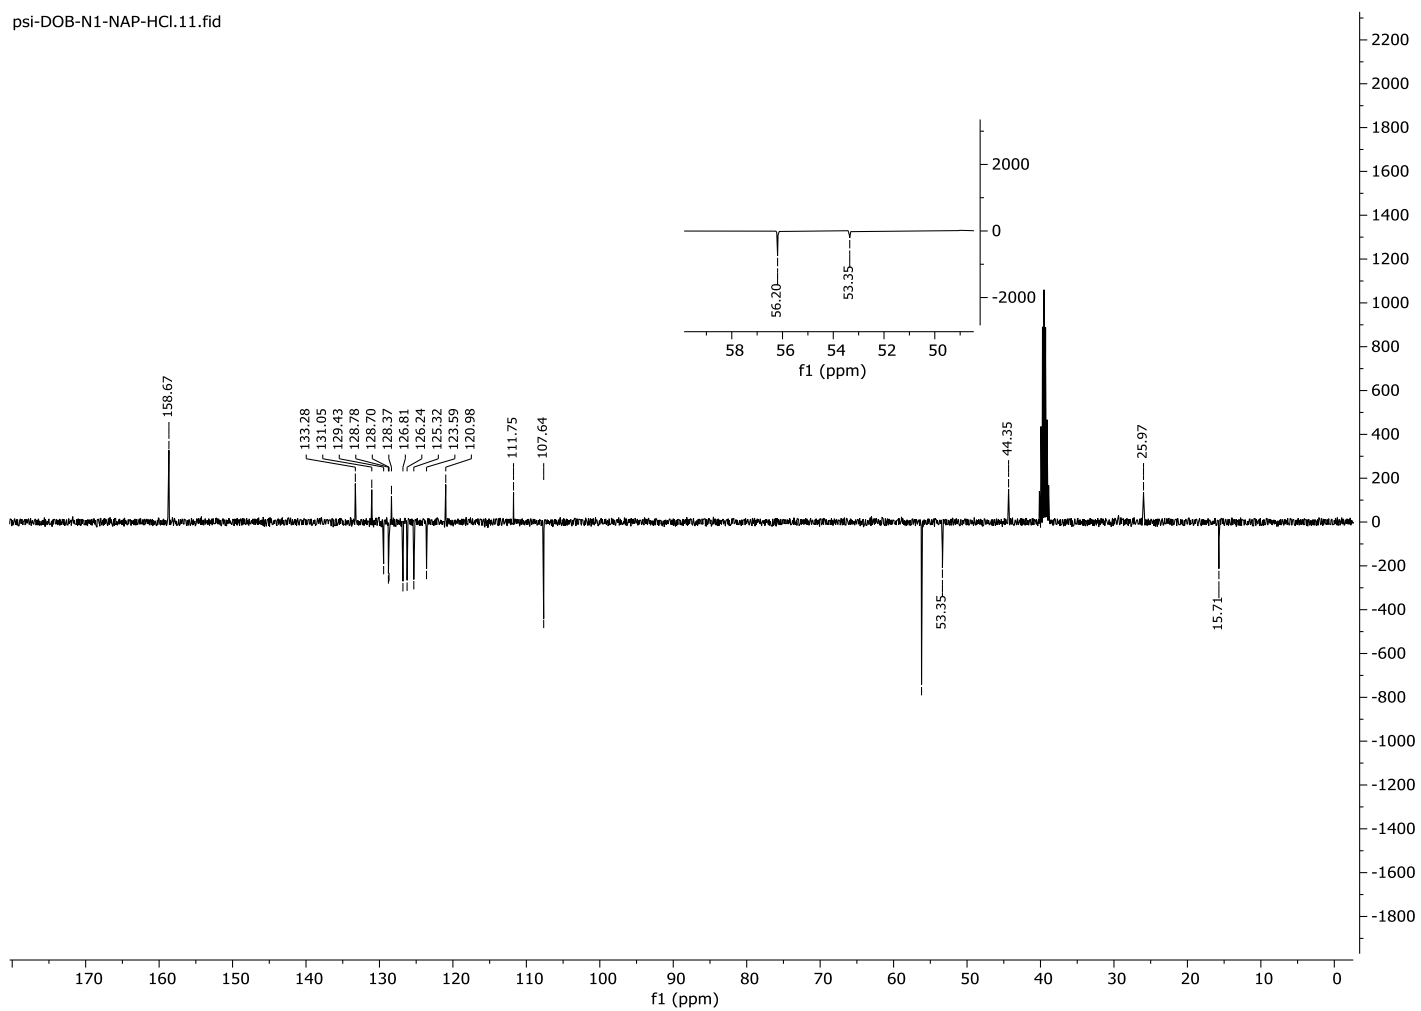

# Spectra 64. <sup>13</sup>C NMR of 2C2-NBOMe (31) HCl

2C2-NBOMe HCl

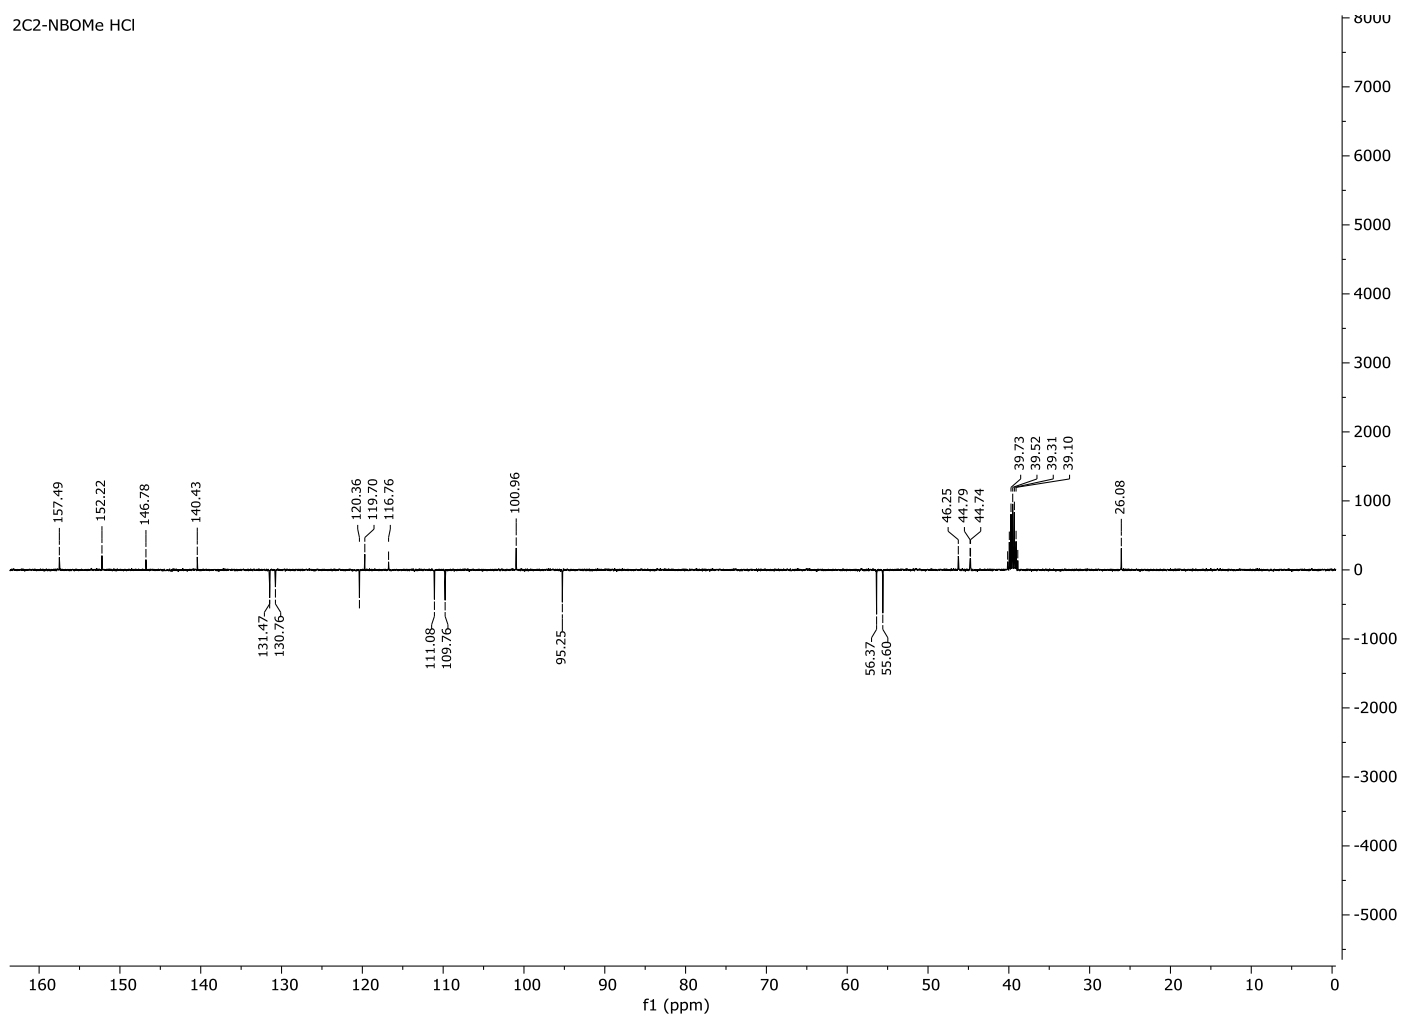



# Spectra 65. <sup>13</sup>C NMR of 25O-NBOMe (32) HCl

25O-NBOMe HCl.11.fid

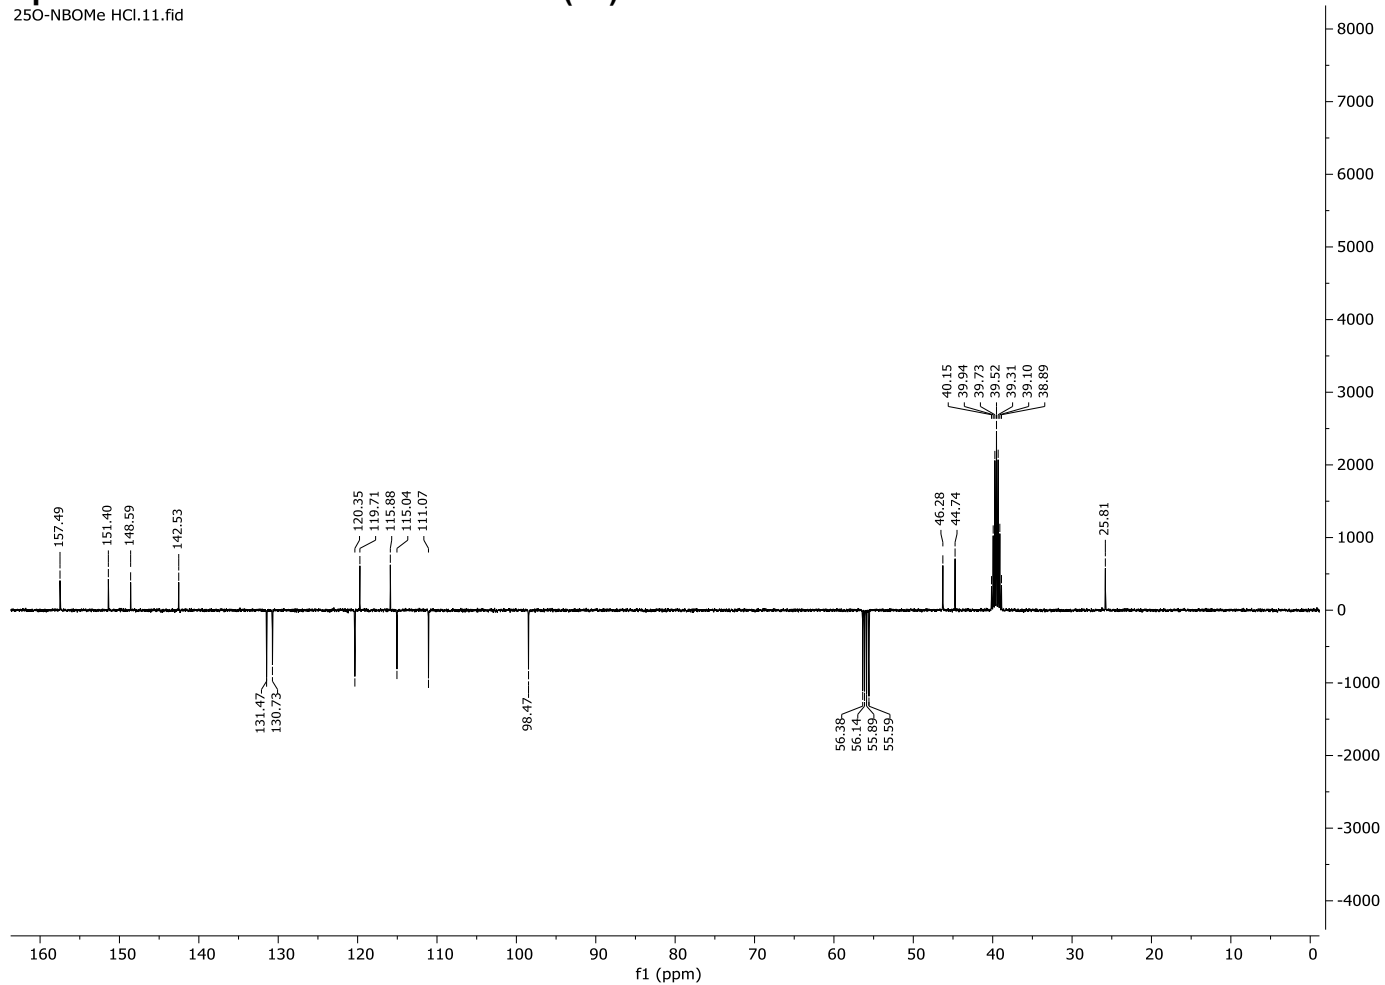

# Spectra 66. <sup>13</sup>C NMR of 25O-NBcP (33) HCl

25O-NBcP HCl

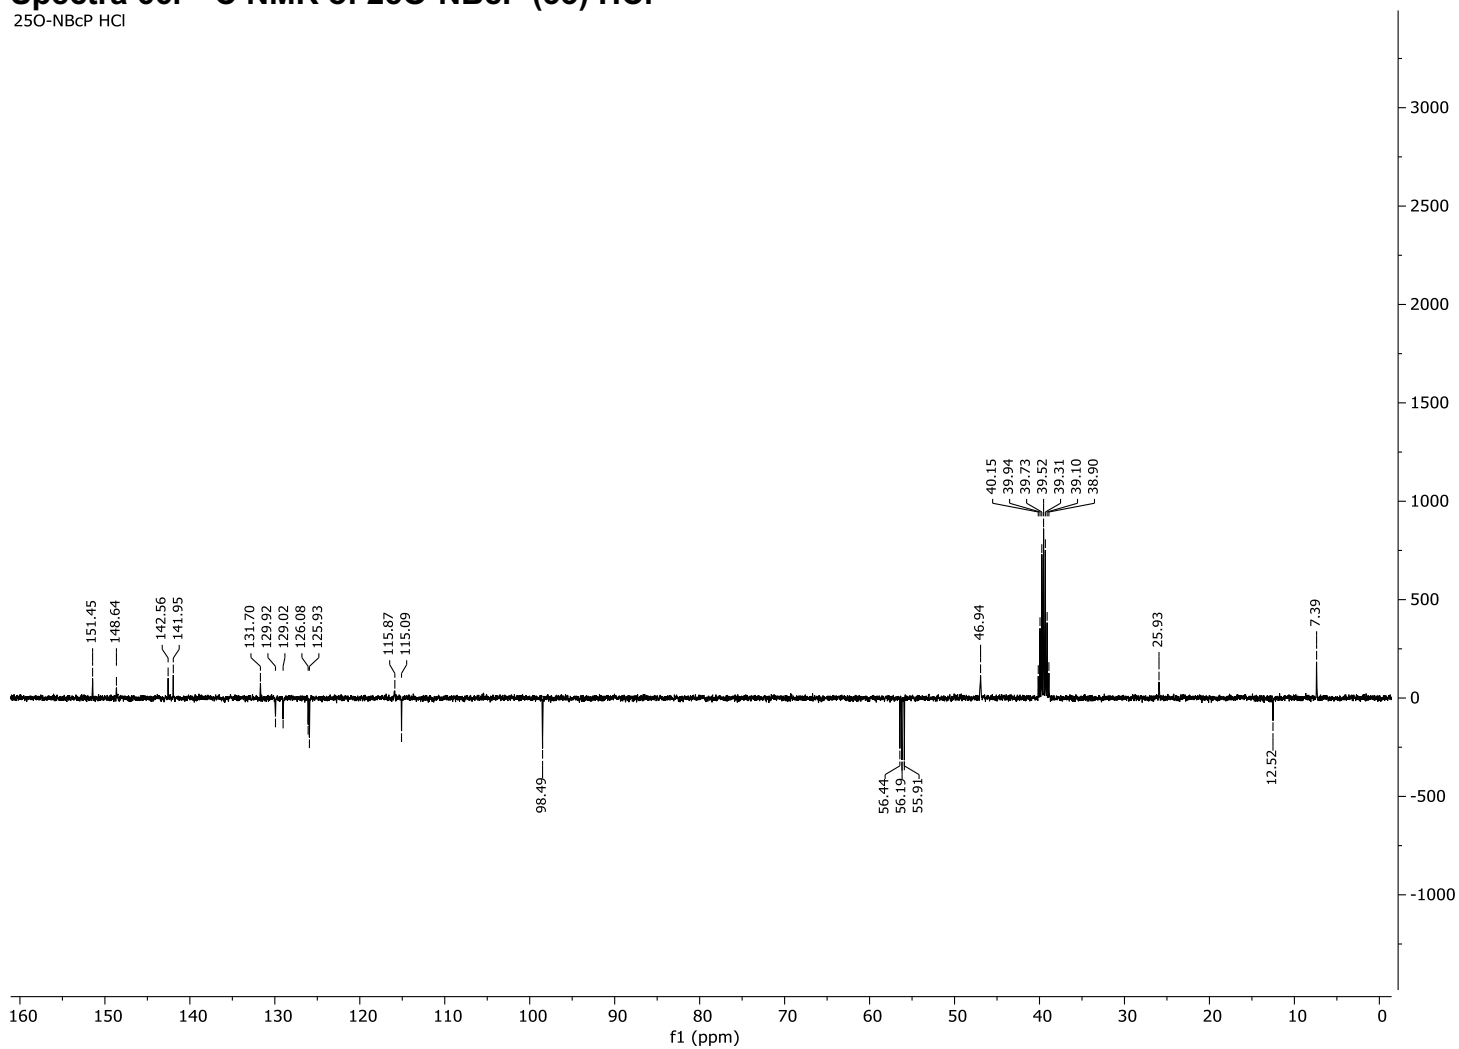

# Spectra 67. <sup>13</sup>C NMR of 25O-NB-3-I (34) HCl

25O-NB-3-I HCl

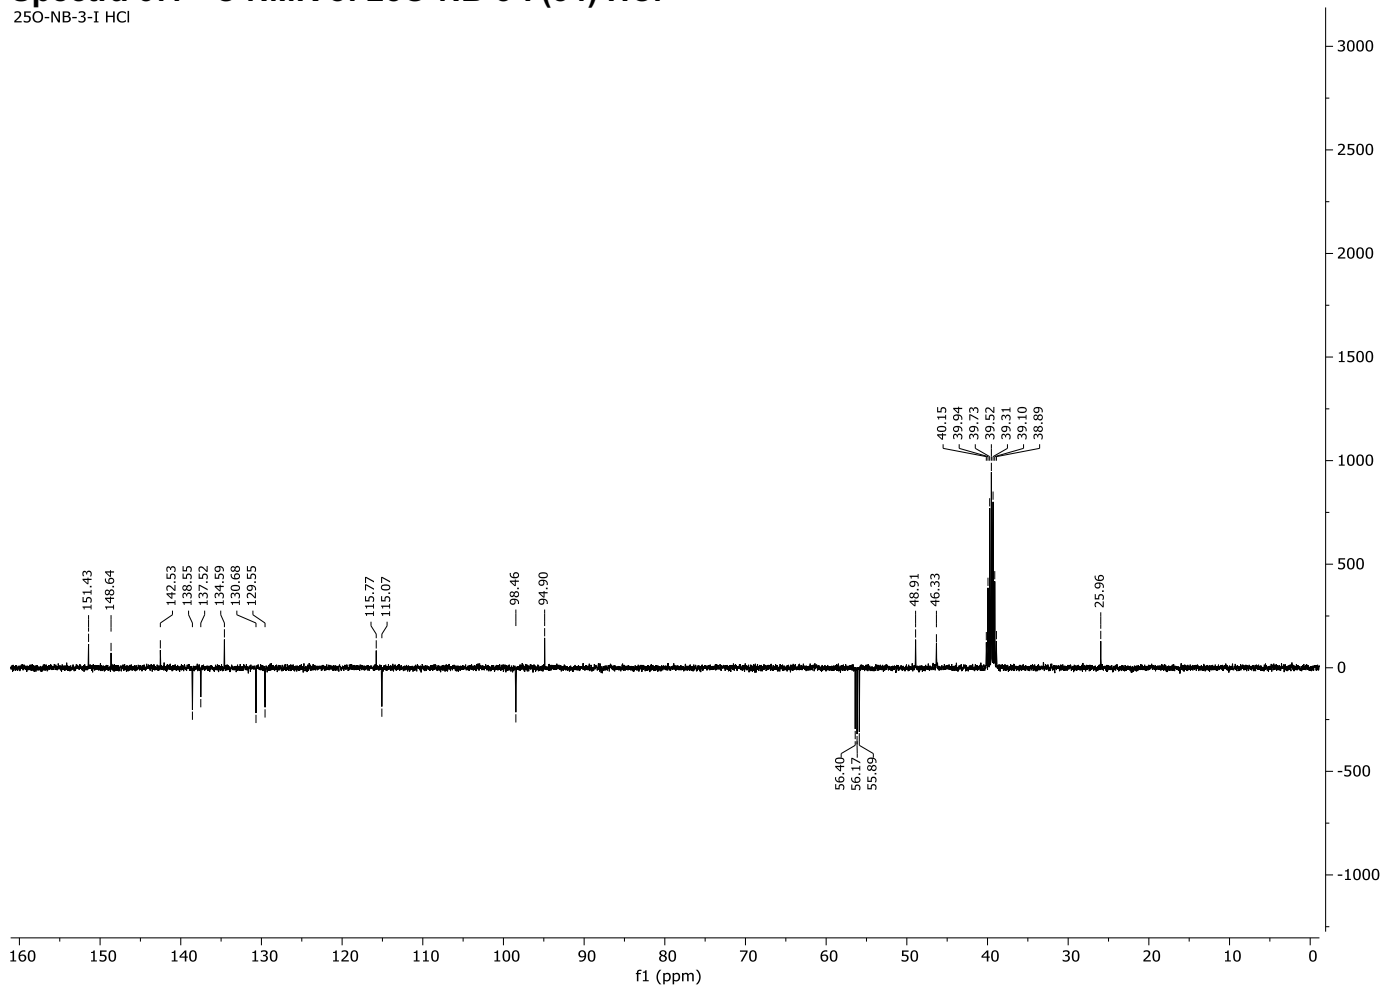

# Spectra 68. <sup>13</sup>C NMR of 25O-NBPh-10'-OH (35) HCl

25O-NBPh-10'-OH HCl

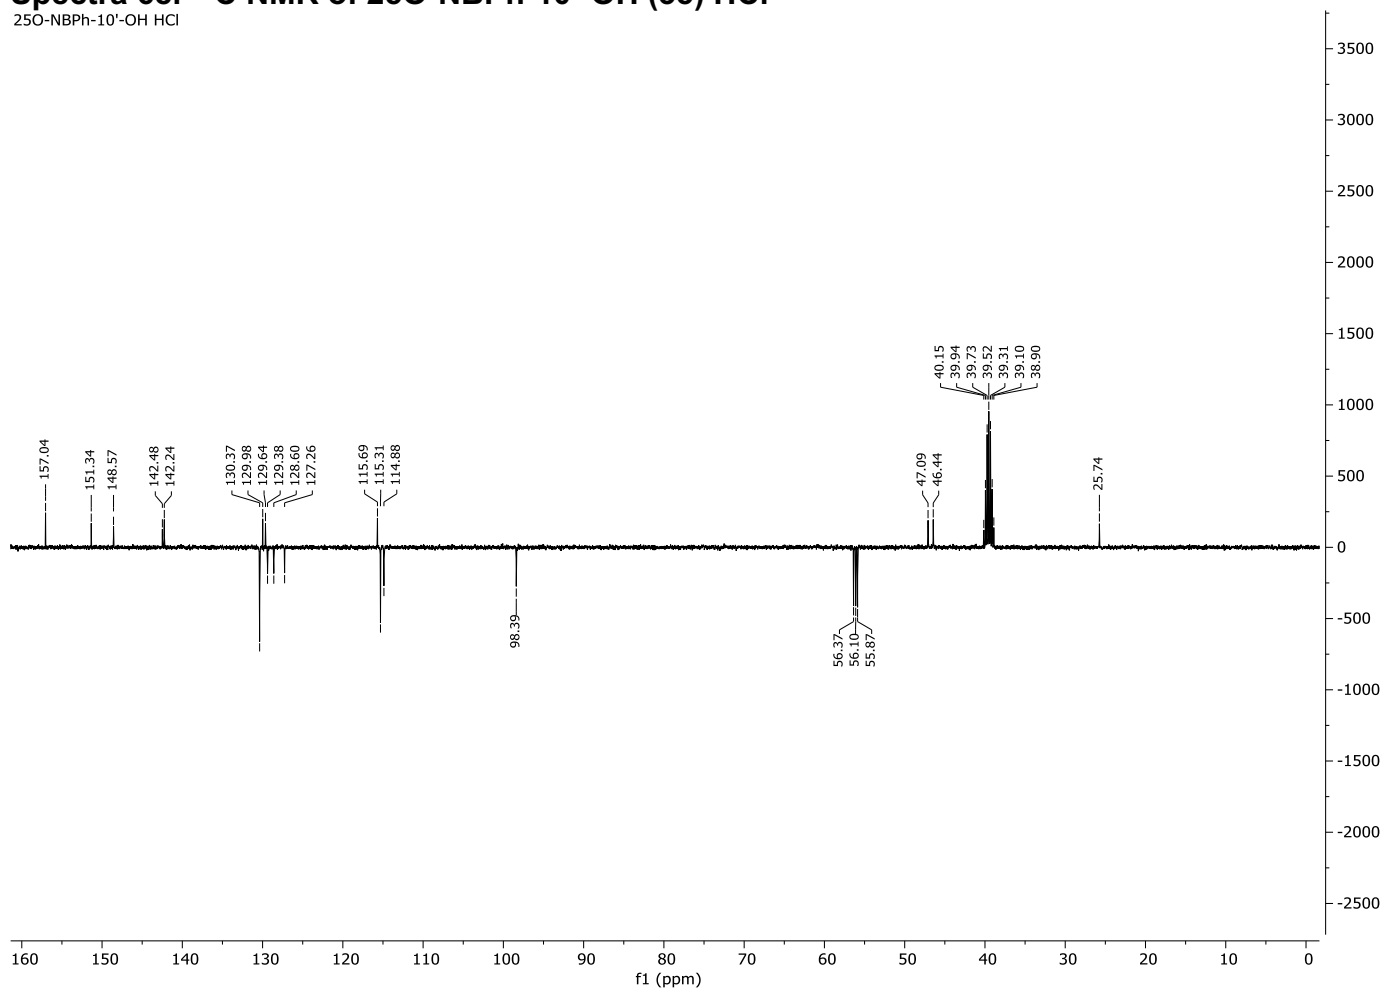

# Spectra 69. 19F NMR of 25N-NBF (7) HCl

25N-NBF HCl 19F NMR

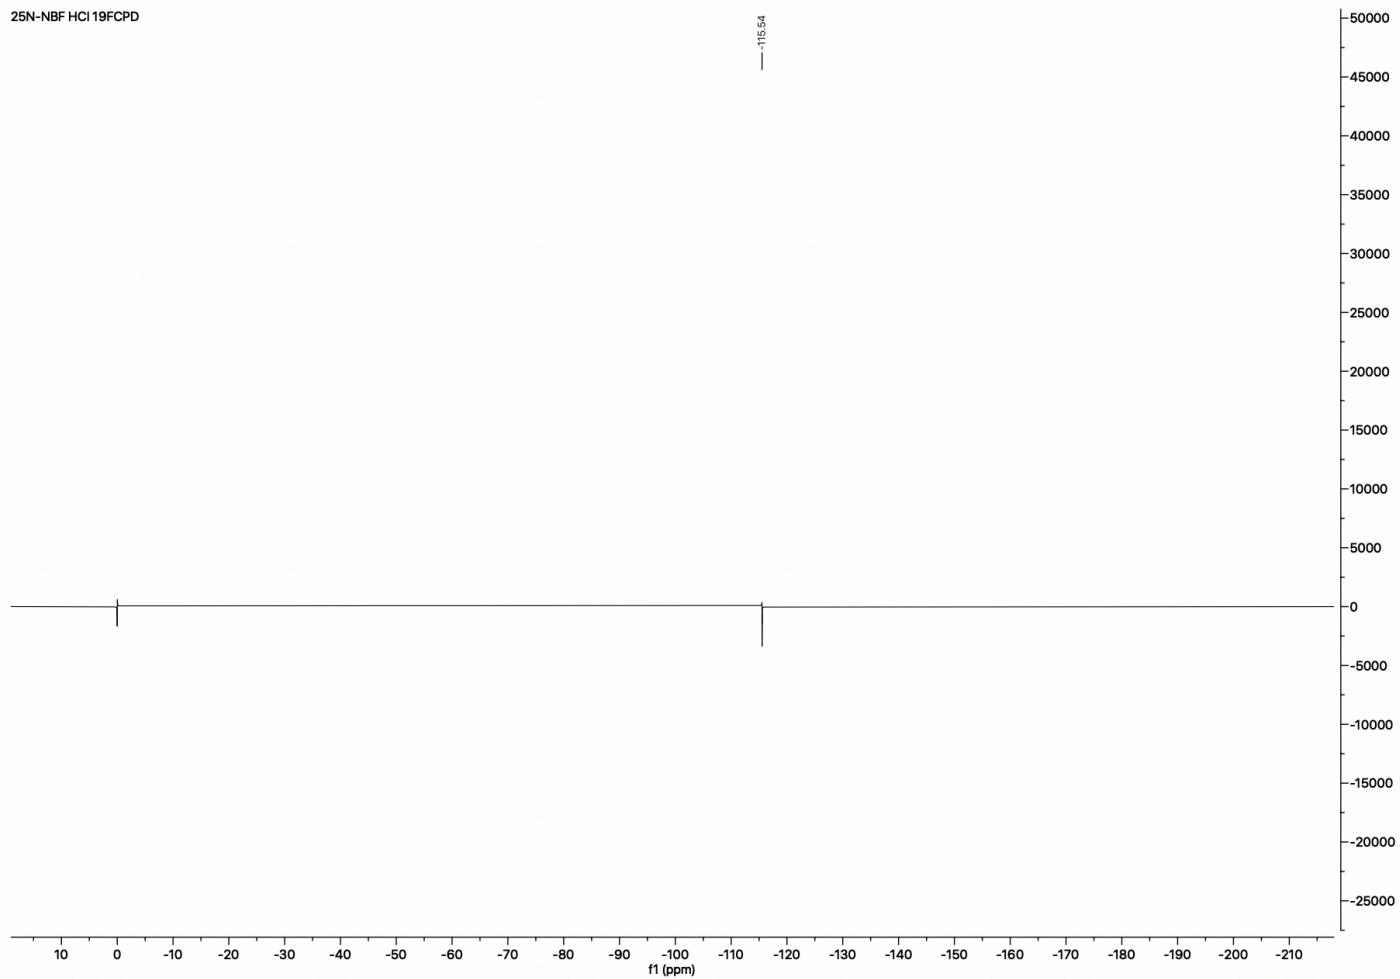

# Spectra 70. $^{19}\text{F}$ NMR of 25N-NBOCF<sub>2</sub>H (11) HCl

25N-NBOCF<sub>2</sub>H (11) HCl 19FCPD

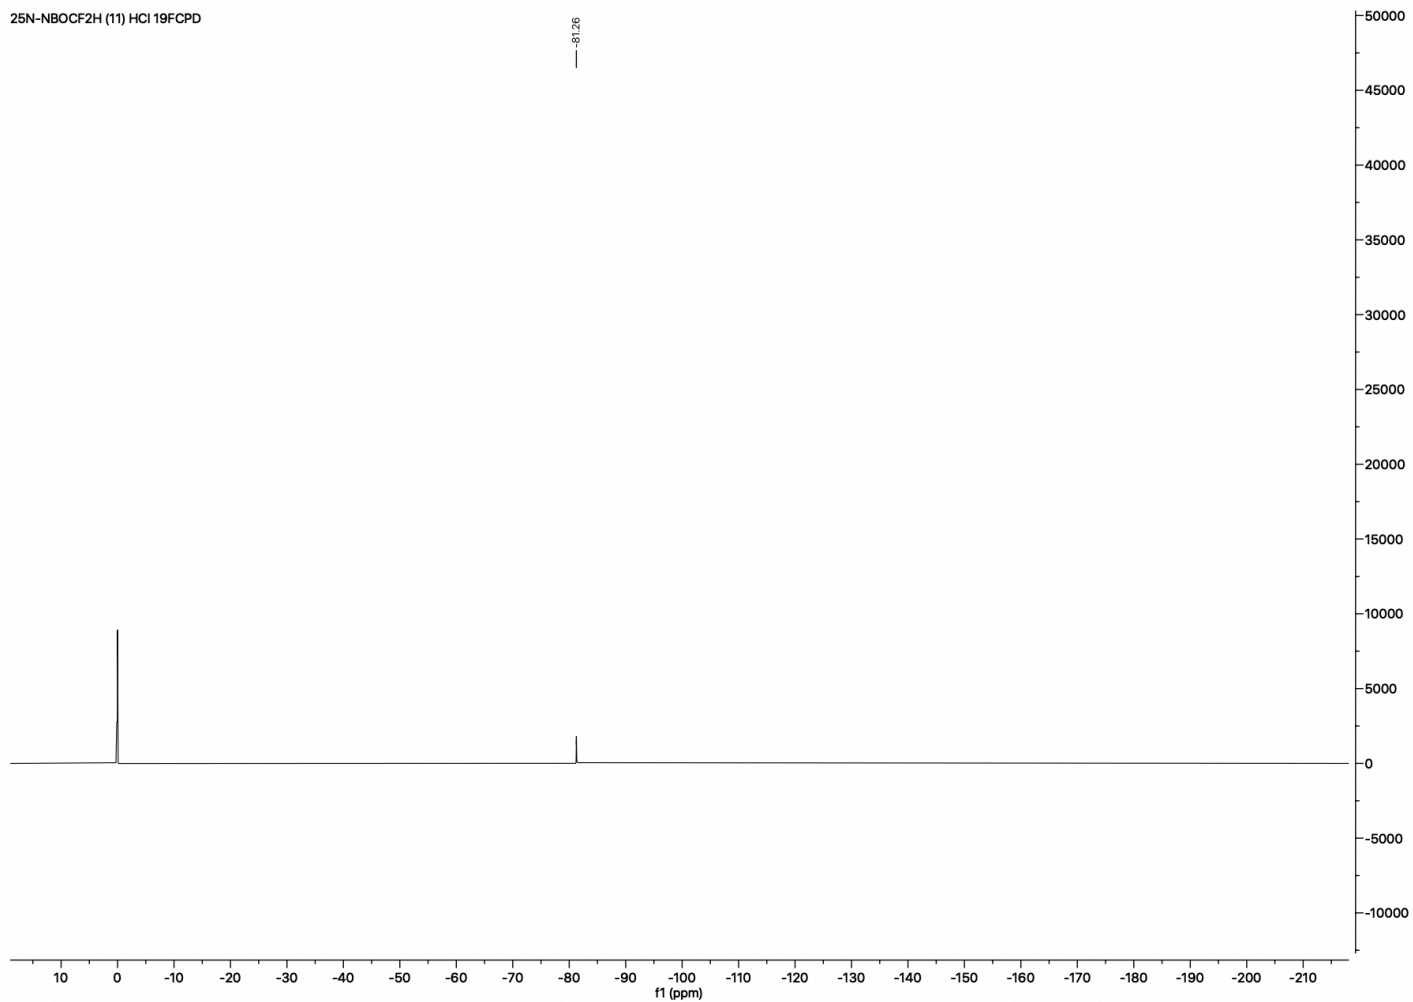

# Spectra 71. $^{19}\text{F}$ NMR of 25N-NBOCF<sub>3</sub> (12) HCl

25N-NBOCF<sub>3</sub> (12) HCl 19FCPD

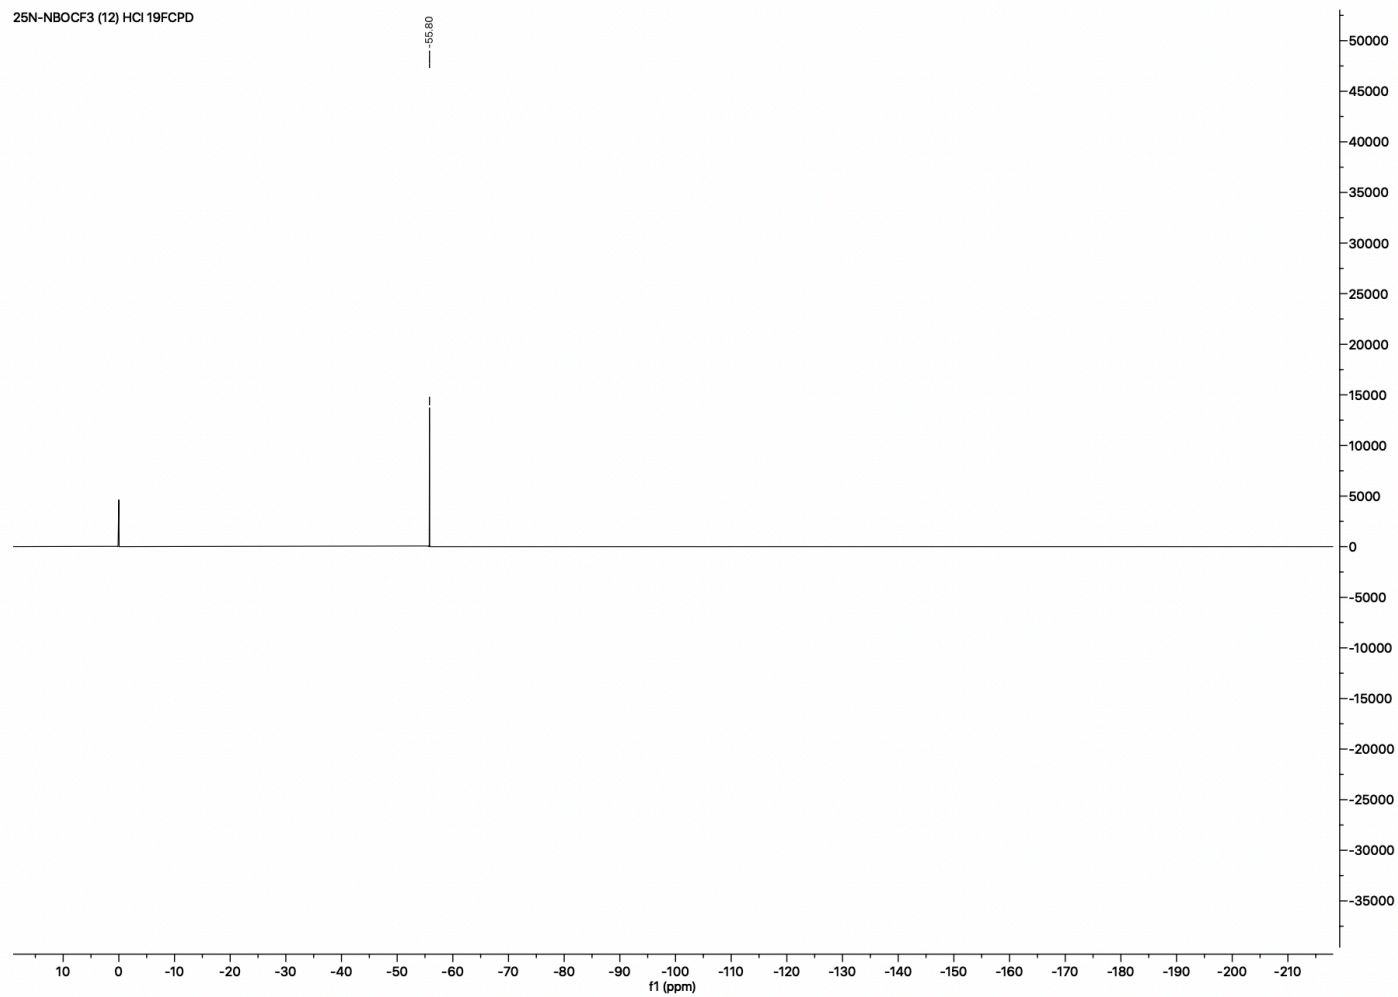

# Spectra 72. $^{19}\text{F}$ NMR of 25N-NBMDF<sub>2</sub> (13) HCl

25N-NBMDF2 (13) HCl 19FCPD

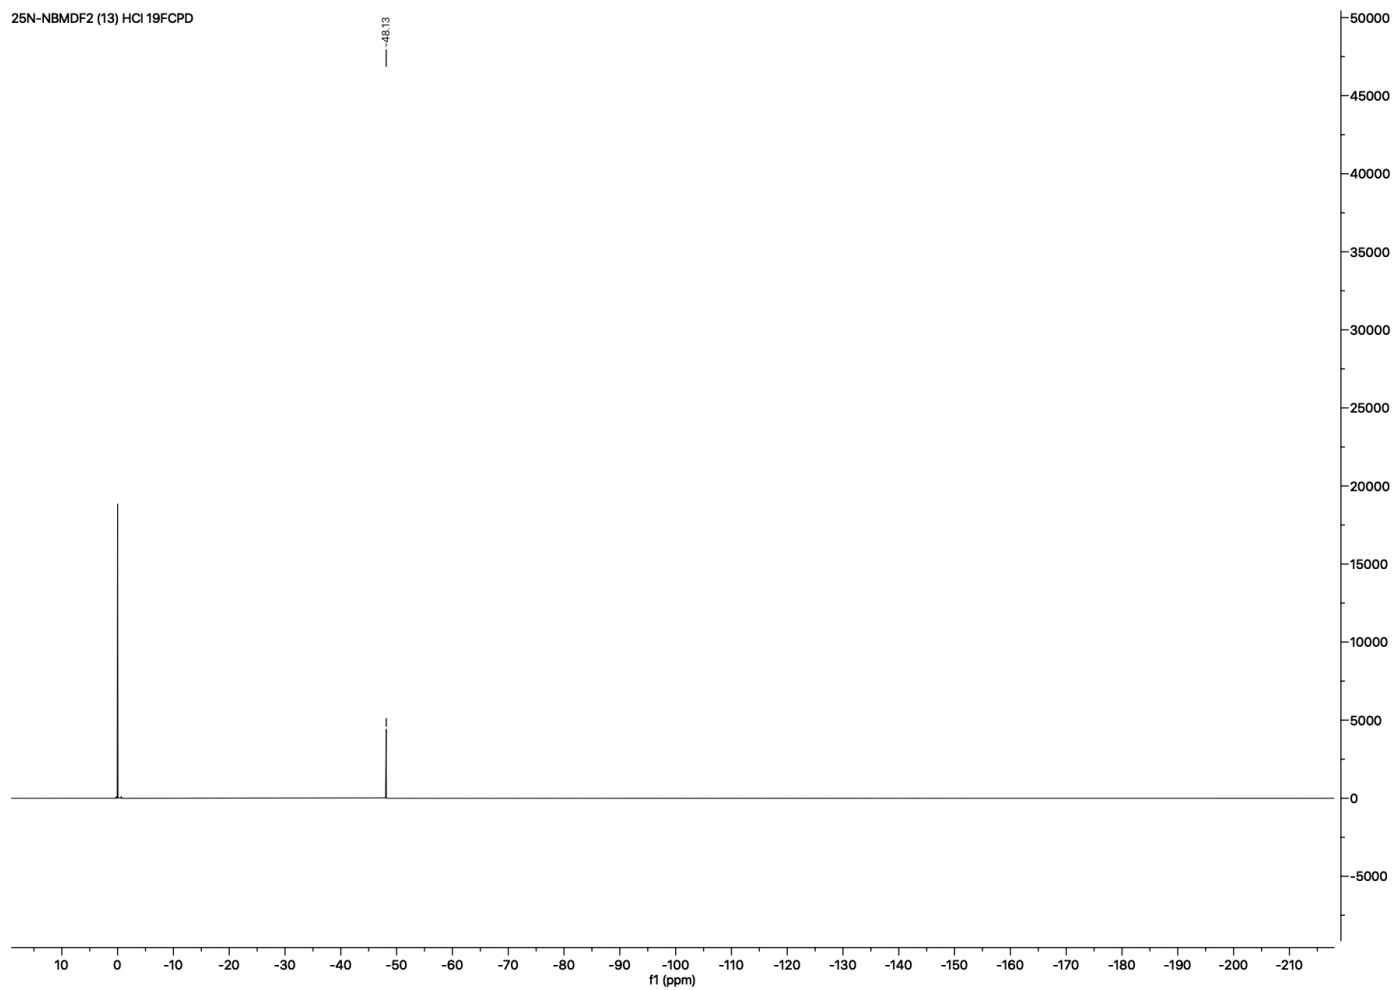



# Spectra 73. $^{19}\text{F}$ NMR of 25N-NBCF<sub>3</sub> (14) HCl

25N-NBCF<sub>3</sub> (14) HCl 19FCPD

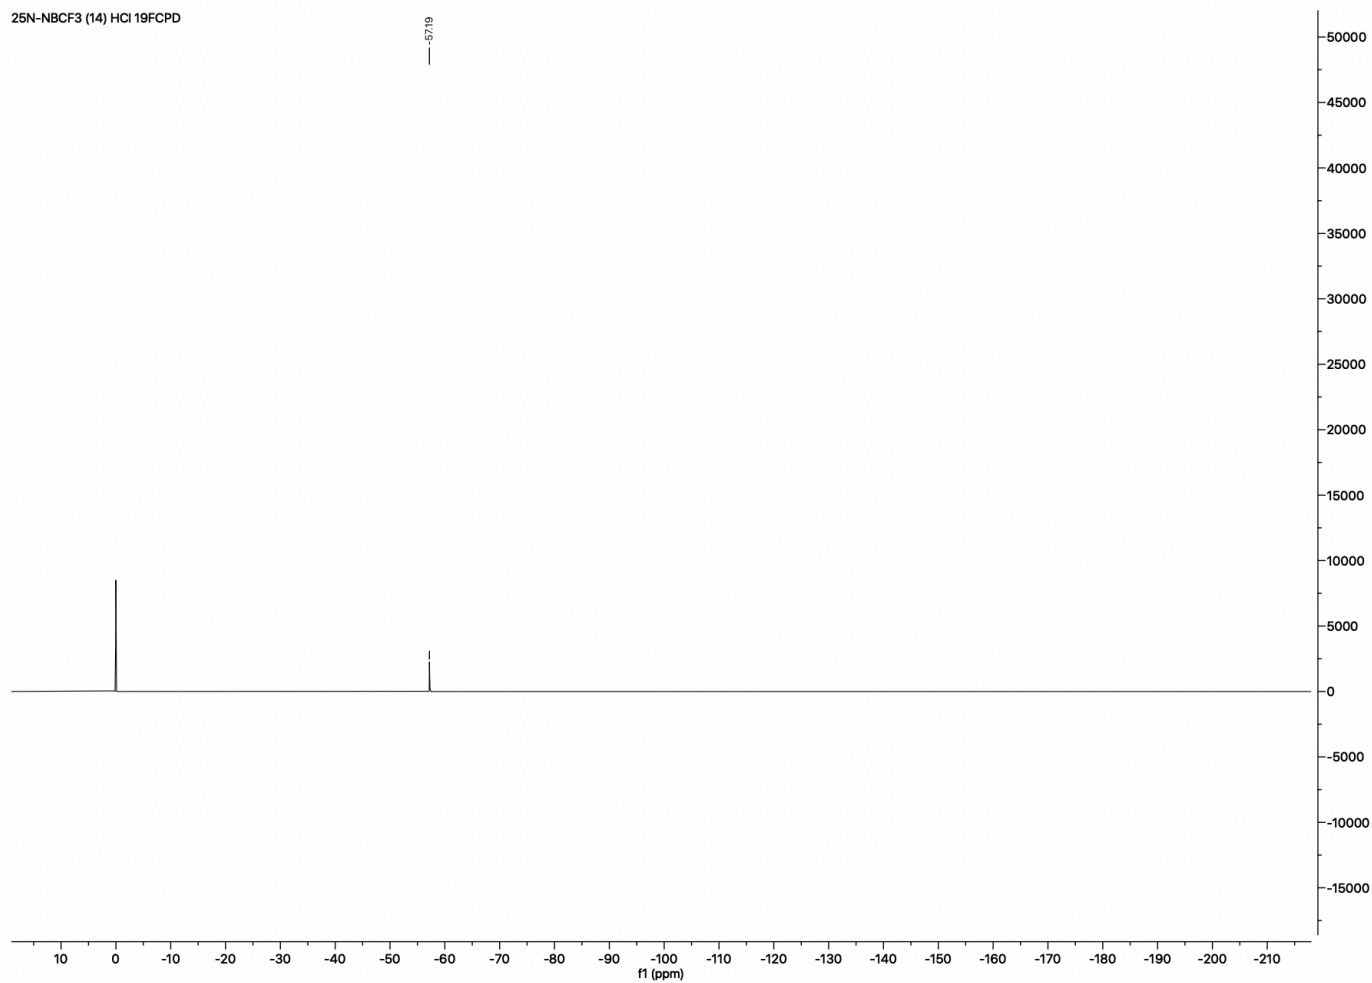

# Spectra 74. $^{19}\text{F}$ NMR of 25N-NB-2-MeO-3-F (19) HCl

25N-NB-2-MeO-3-F (19) HCl 19FCPD

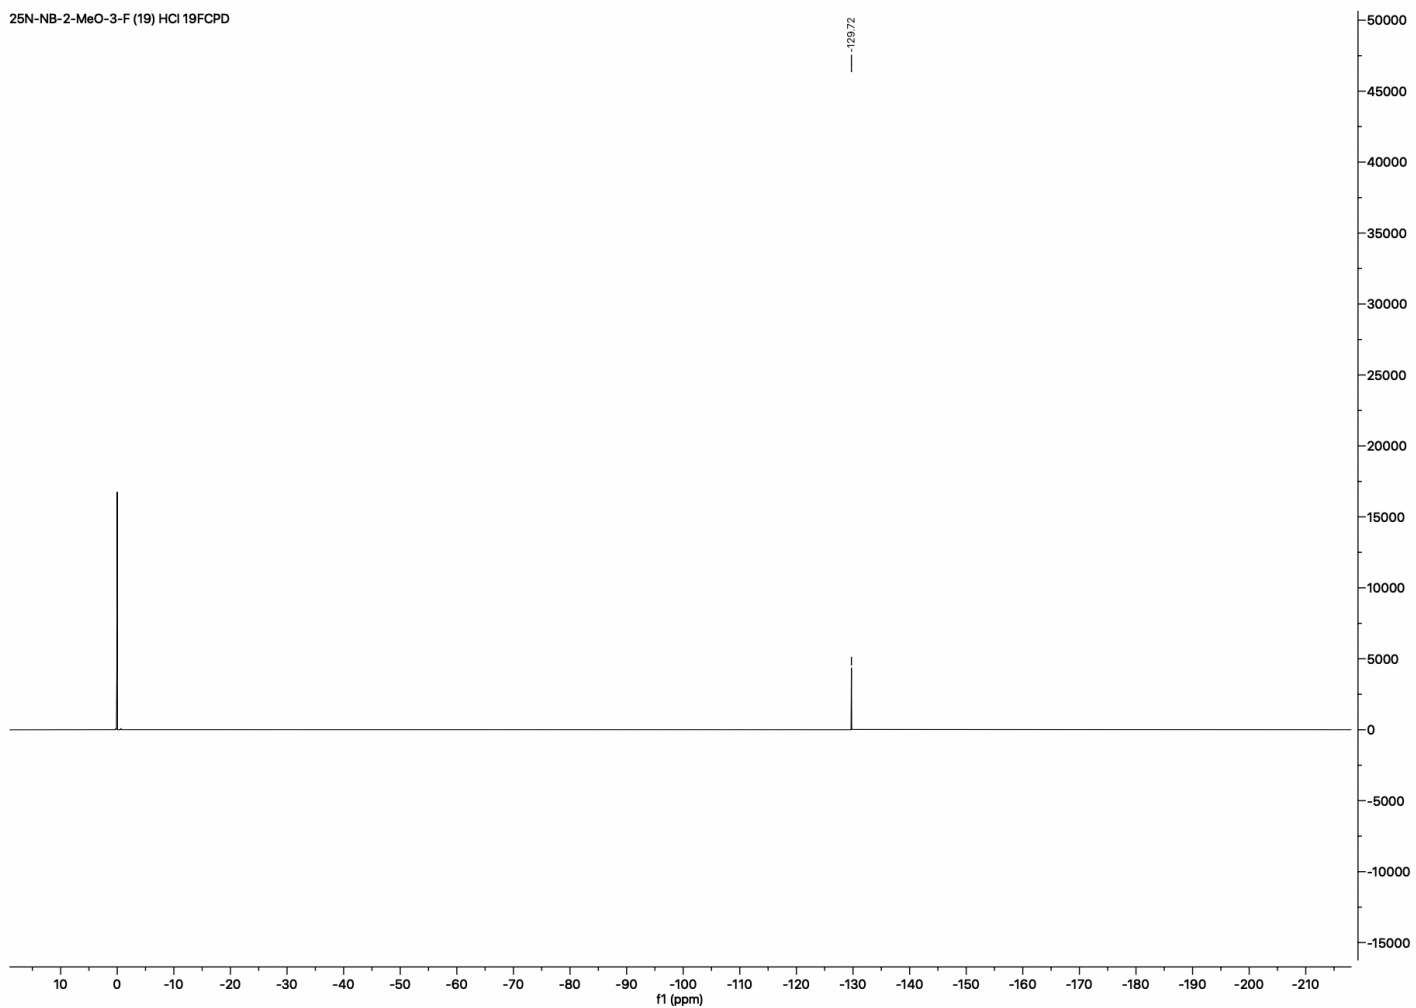

# Spectra 75. $^{19}\text{F}$ NMR of 25N-NB-3-F (24) HCl

25N-NB-3-F (24) HCl 19FCPD

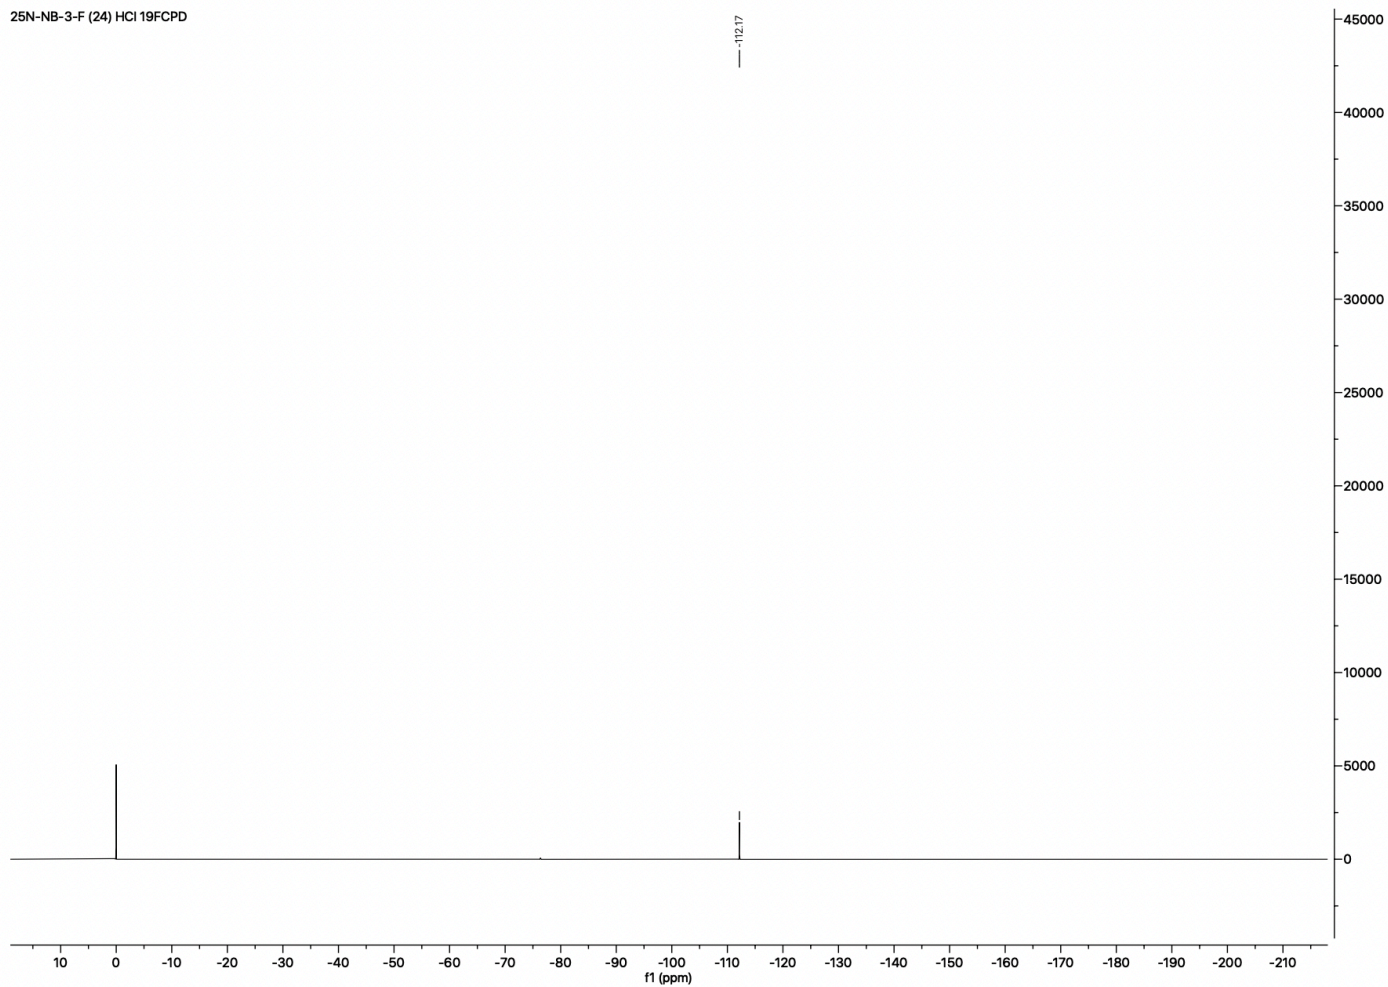

# Spectra 76. $^{19}\text{F}$ NMR of 25N-NB-4-F (25) HCl

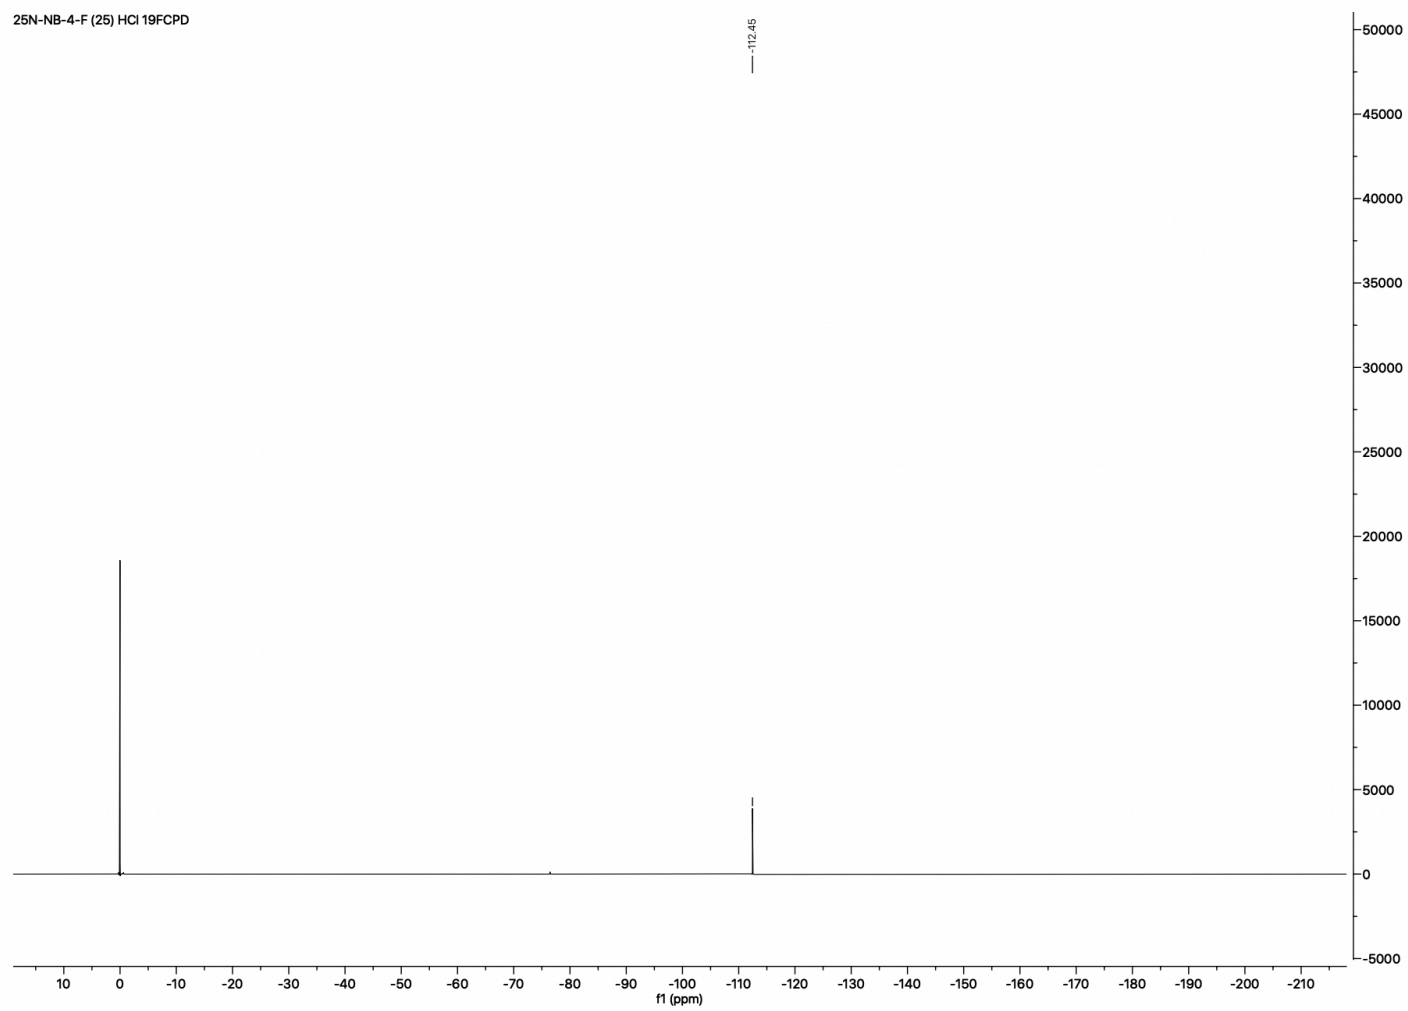

Supplement: 41467_2023_44016_MOESM5_ESM.pdf [file 41467_2023_44016_MOESM5_ESM.pdf]
