# Supplementary material for: Identification of 5-HT2A receptor signaling pathways associated with psychedelic potential
Source: PubMed Central journal article supplement (PMC10724237; doi:10.1038/s41467-023-44016-1), 2023-12-15

**HPLC Traces of Final *N*-Benzyl Phenethylamines.** HPLC experiments performed on HCl salts at 1 mg/mL.

**HPLC Trace of 25N-NB (2).** Purity (Peak area): 99.5%; Wavelength: 220 nm.

DAD1 B, Sig=220,16 Ref=360,100 (25N 2020-09-30 15-03-54\25N-NB1.D)

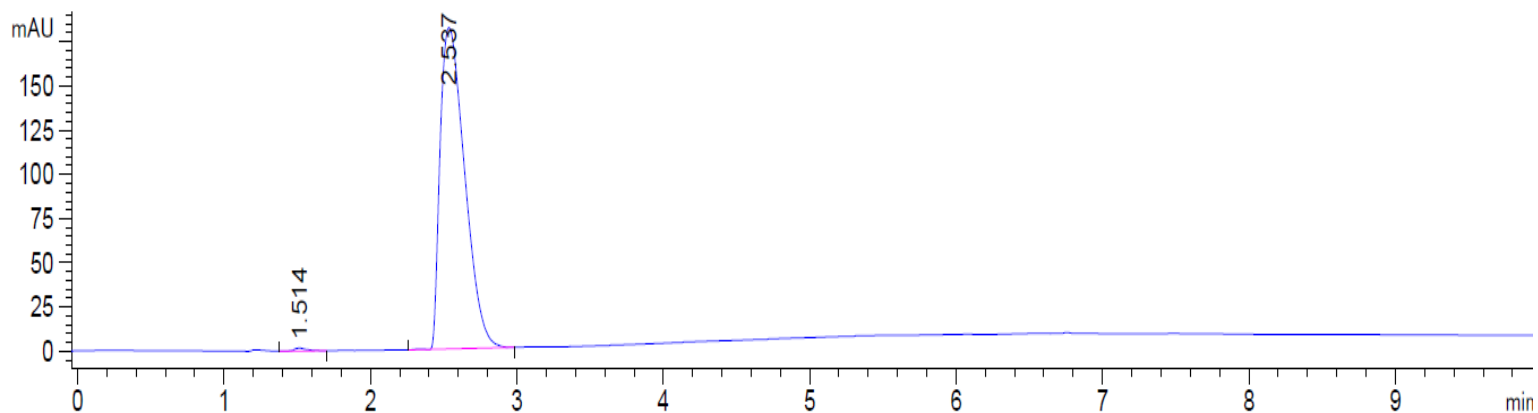

**HPLC Trace of 25N-NBOH (3).** Purity (Peak area): 97.4%; Wavelength: 220 nm.

DAD1 B, Sig=220,16 Ref=360,100 (N-BENZYL 2020-09-22 13-57-31\25-NBOH HCL1.D)

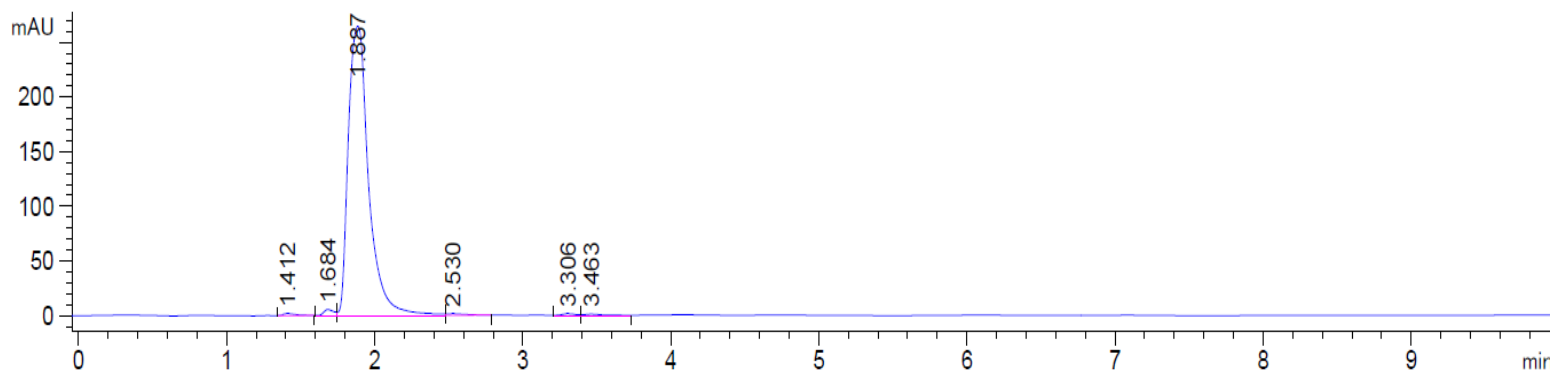

**HPLC Trace of 25N-NBOMe (4).** Purity (Peak area): 98.7%; Wavelength: 220 nm.

DAD1 B, Sig=220,16 Ref=360,100 (25N 2020-09-30 15-03-54\25N-NBOME1.D)

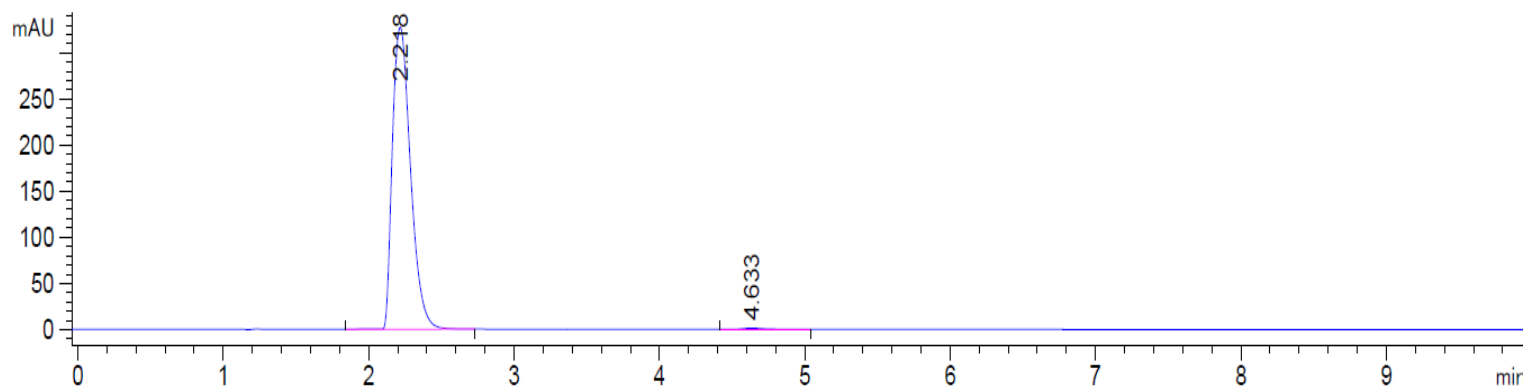

**HPLC Trace of 25N-NBOEt (5).** Purity (Peak area): 98.8%; Wavelength: 220 nm.

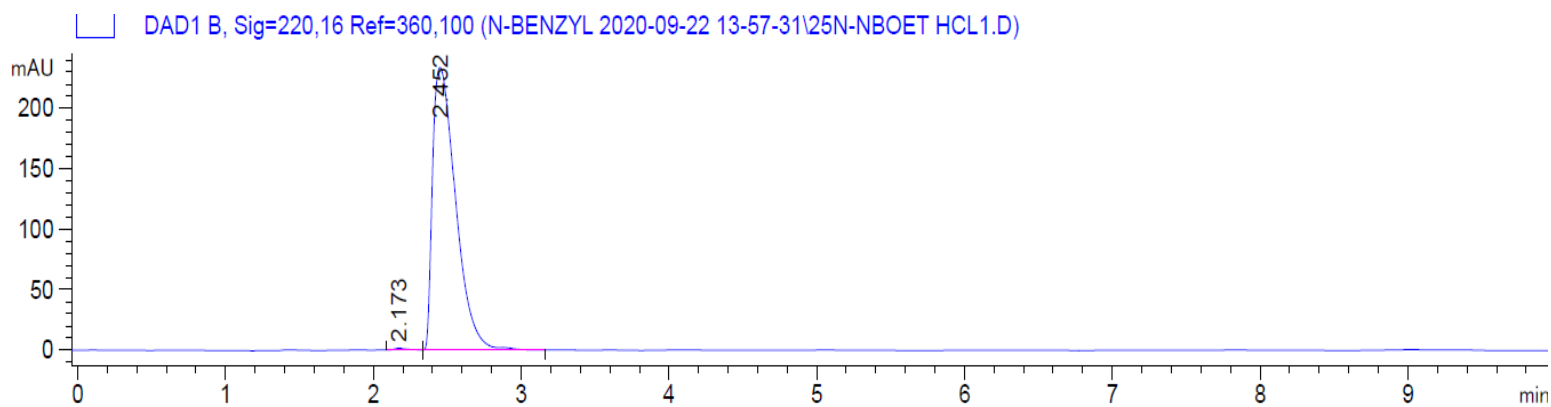

**HPLC Trace of 25N-NBMe (6).** Purity (Peak area): 98.4%; Wavelength: 220 nm.

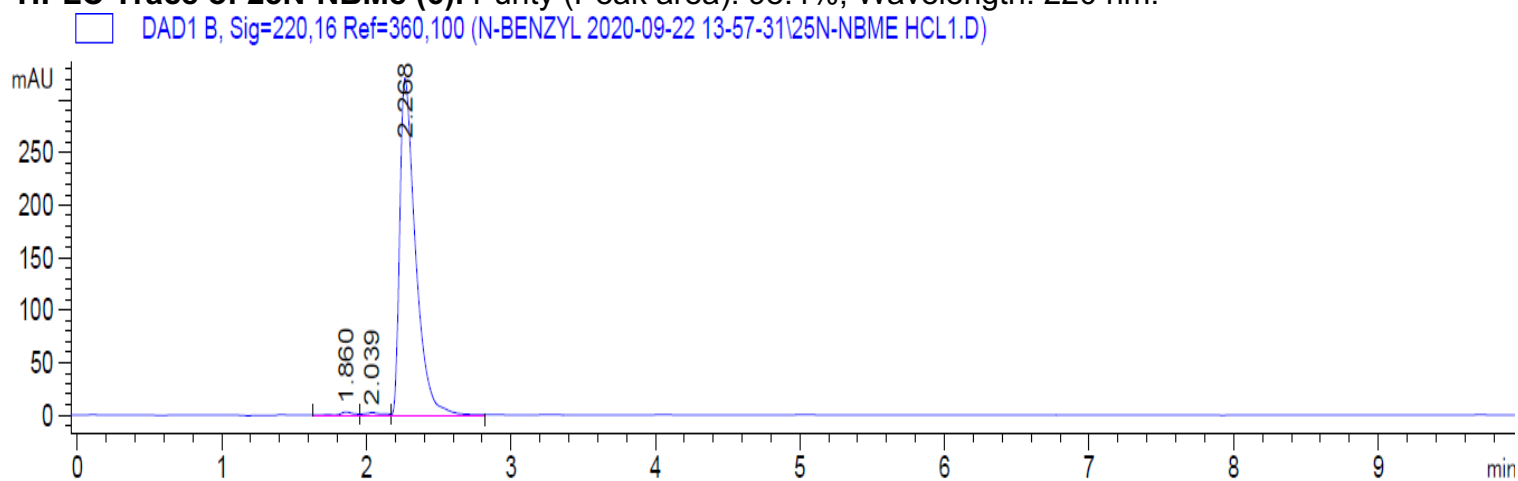

**HPLC Trace of 25N-NBF (7).** Purity (Peak area): 100%; Wavelength: 220 nm.

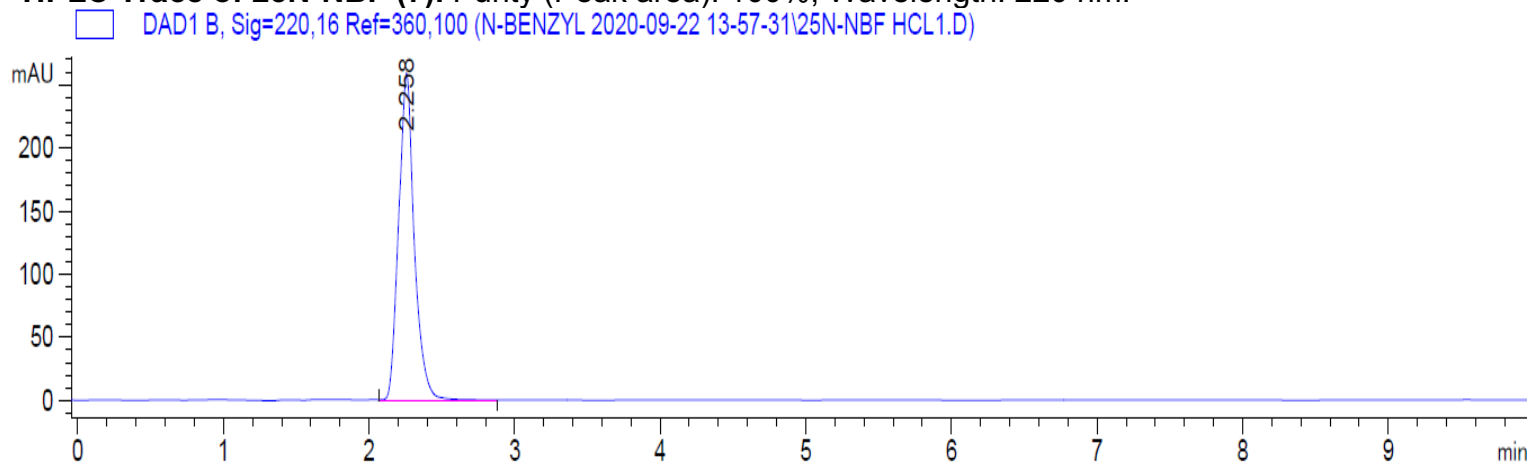

**HPLC Trace of 25N-NBCI (8).** Purity (Peak area): 98.8%; Wavelength: 220 nm.

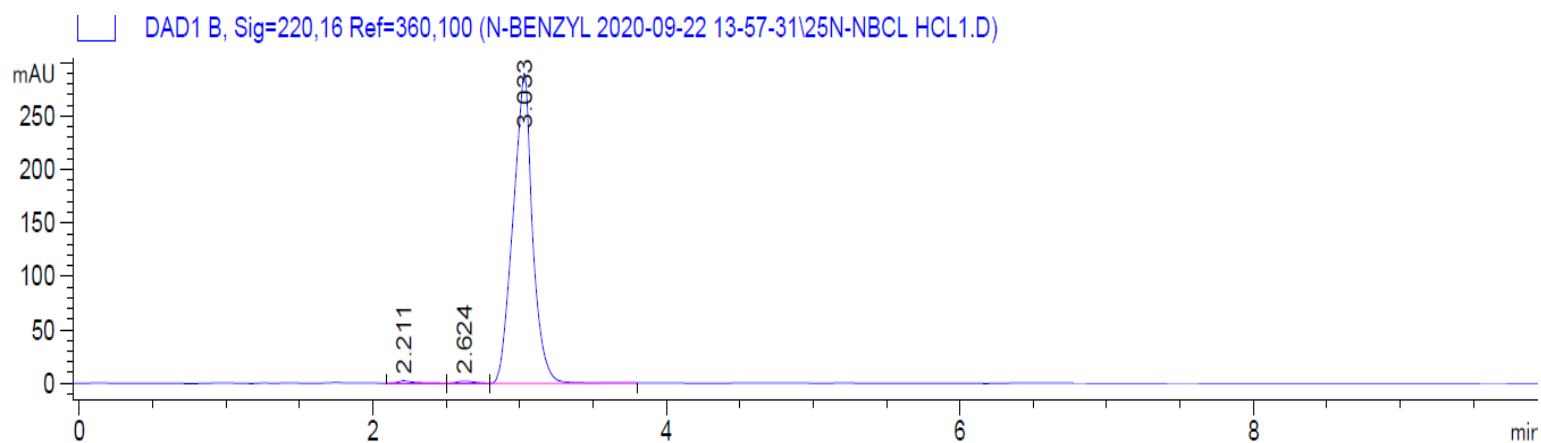

**HPLC Trace of 25N-NBBR (9).** Purity (Peak area): 99.2%; Wavelength: 220 nm.

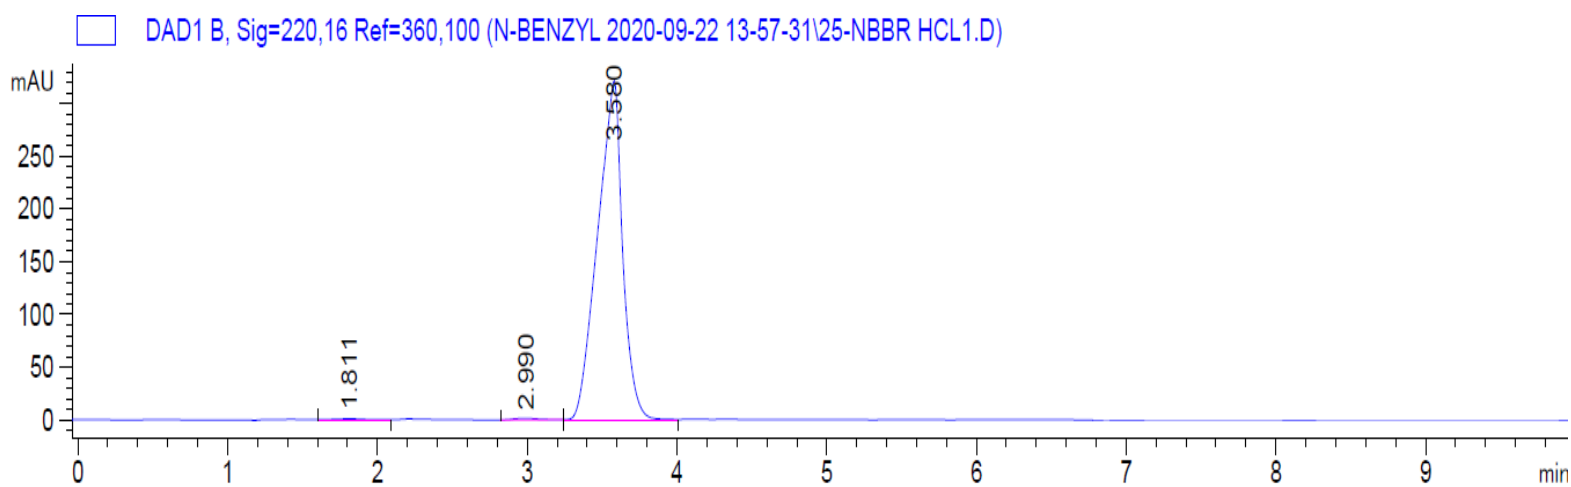

**HPLC Trace of 25N-NBI (10).** Purity (Peak area): 99.0%; Wavelength: 220 nm.

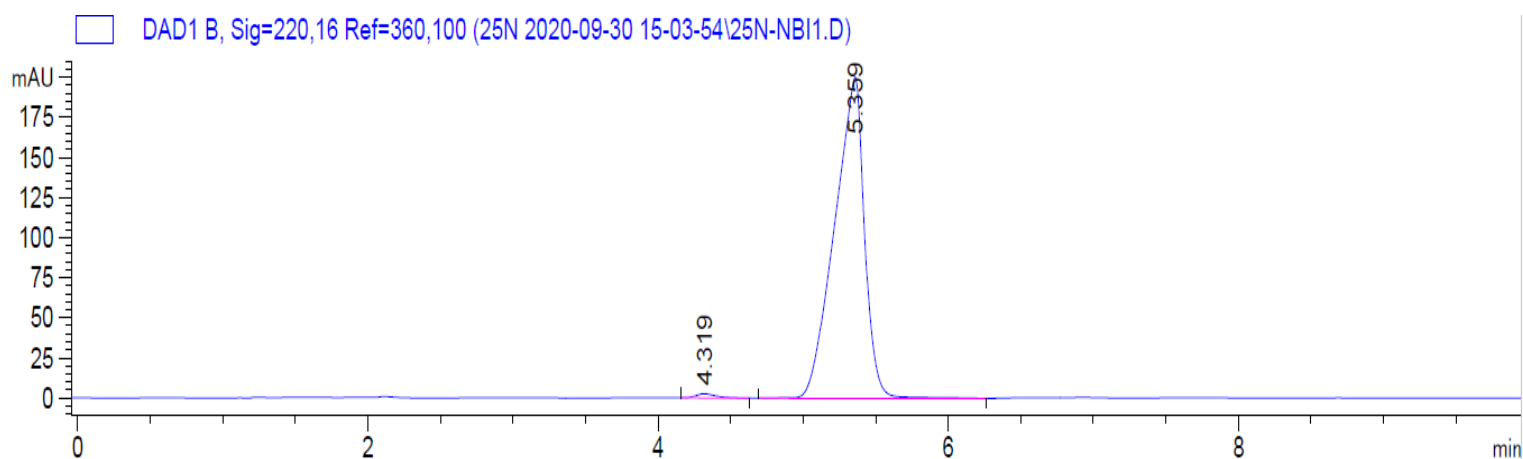

**HPLC Trace of 25N-NBOCF<sub>2</sub>H (11).** Purity (Peak area): 93.1%; Wavelength: 220 nm.

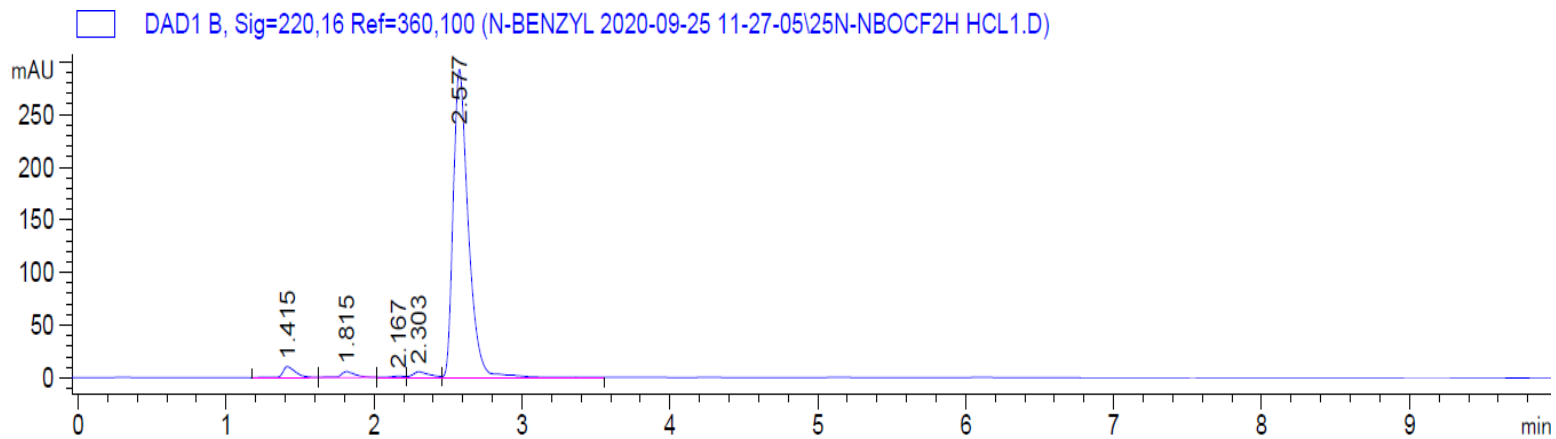

**HPLC Trace of 25N-NBOCF<sub>3</sub> (12).** Purity (Peak area): 98.7%; Wavelength: 220 nm.

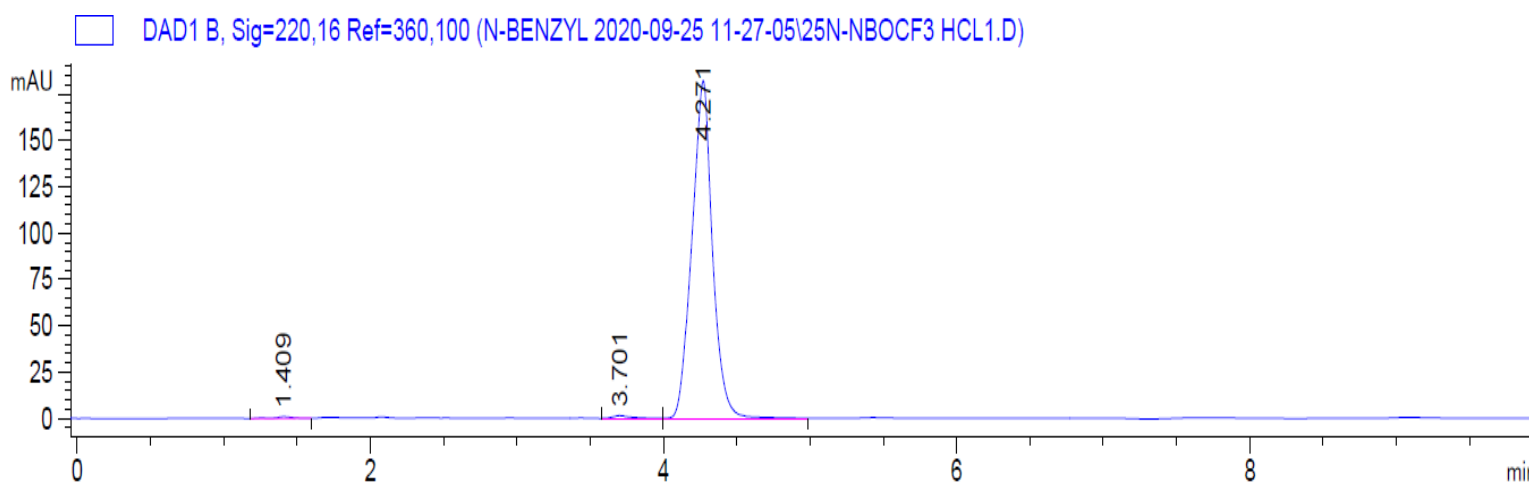

**HPLC Trace of 25N-NBMDF<sub>2</sub> (13).** Purity (Peak area): 98.9%; Wavelength: 220 nm.

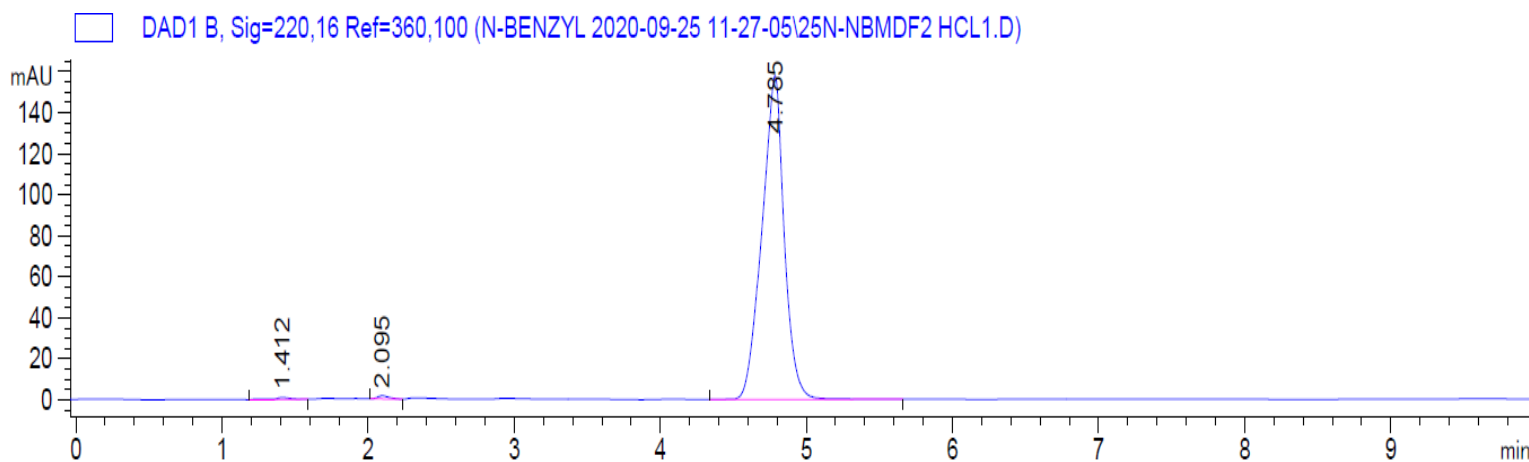

**HPLC Trace of 25N-NBCF<sub>3</sub> (14).** Purity (Peak area): 99.2%; Wavelength: 220 nm.

□ DAD1 B, Sig=220,16 Ref=360,100 (N-BENZYL 2020-09-25 11-27-05\25N-NBCF3 HCL1.D)

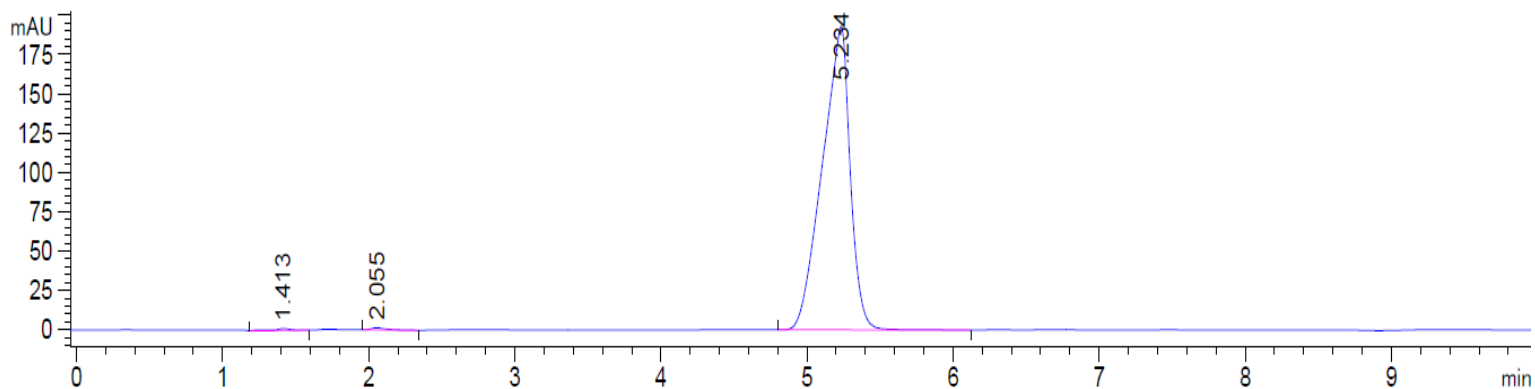

**HPLC Trace of 25N-NBNO<sub>2</sub> (15).** Purity (Peak area): 99.4%; Wavelength: 220 nm.

□ DAD1 B, Sig=220,16 Ref=360,100 (N-BENZYL 2020-09-25 11-27-05\25N-NBNO2 HCL1.D)

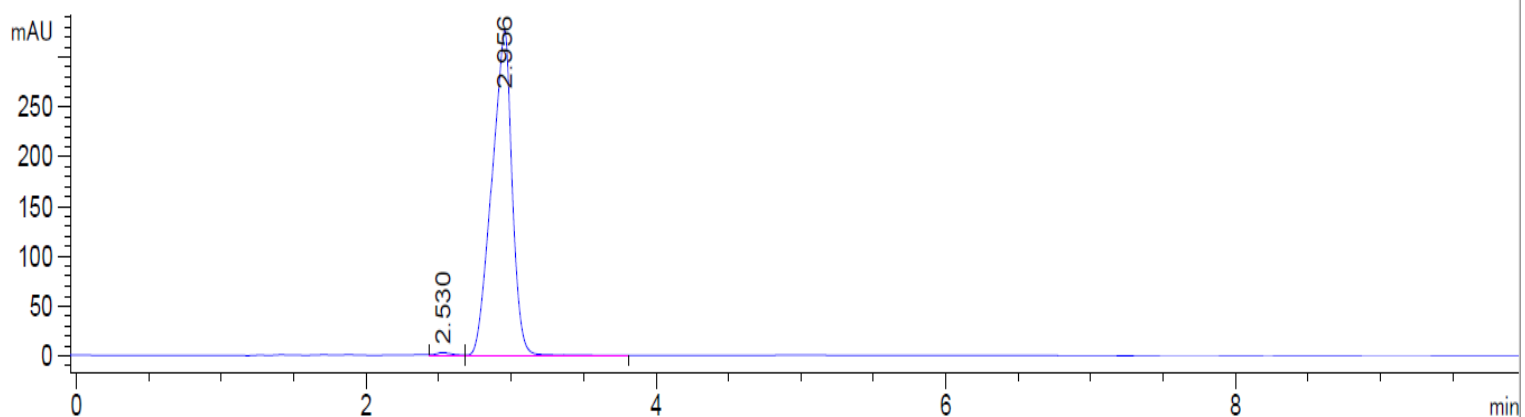

**HPLC Trace of 25N-N1-Nap (16).** Purity (Peak area): 99.2%; Wavelength: 220 nm.

□ DAD1 B, Sig=220,16 Ref=360,100 (N-BENZYL 2020-09-25 11-27-05\25N-N-1 NAPTH HCL1.D)

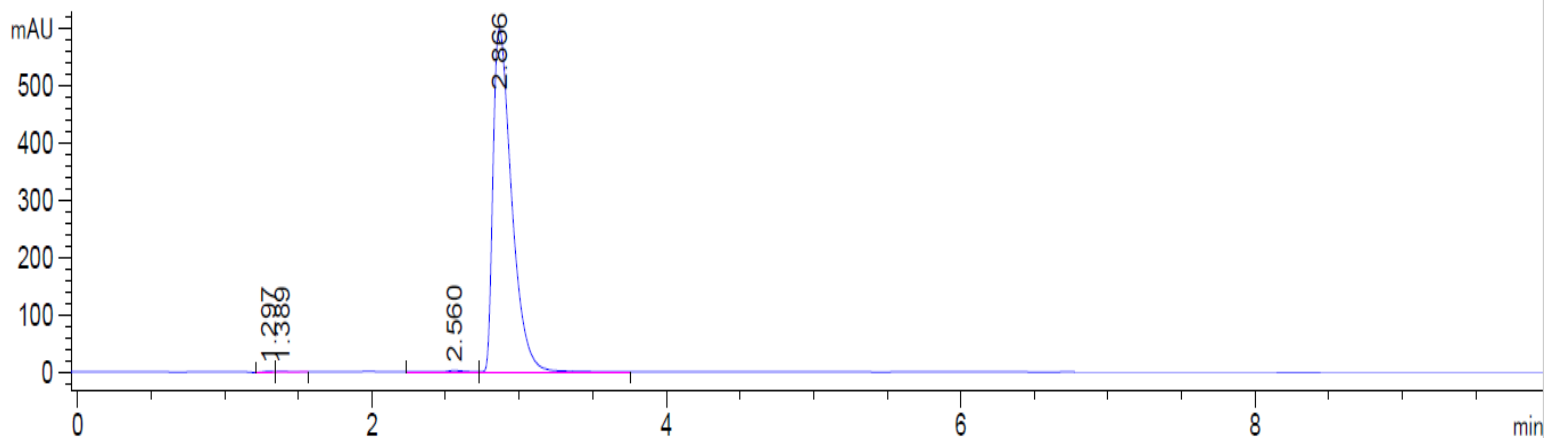

**HPLC Trace of 25N-NBPh (17).** Purity (Peak area): 98.7%; Wavelength: 220 nm.

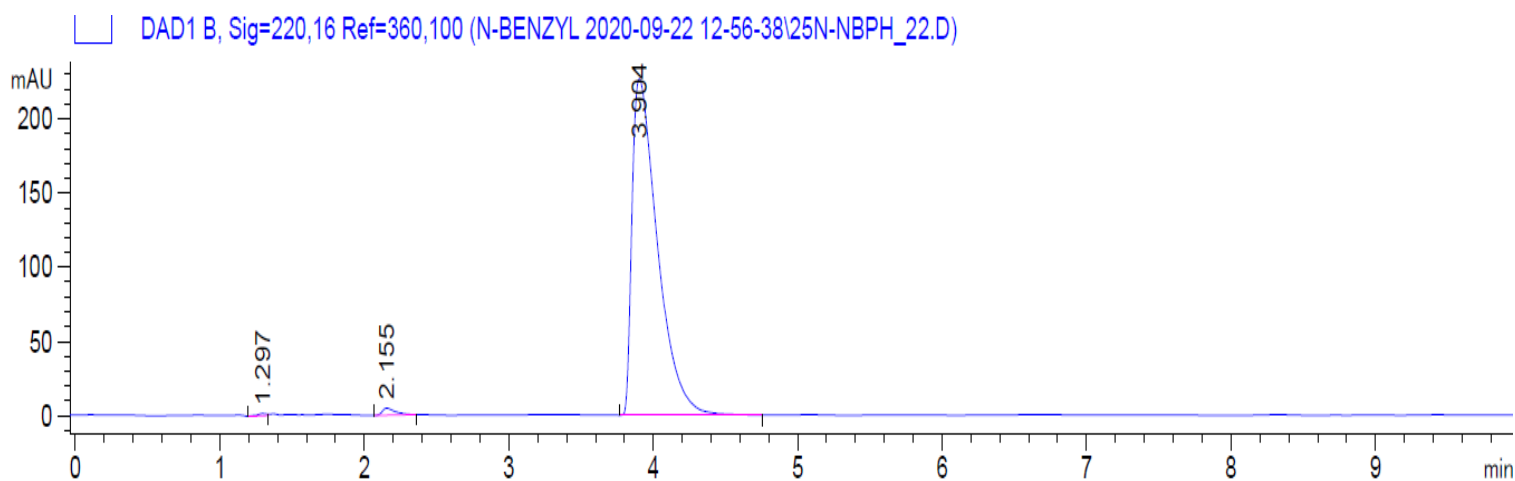

**HPLC Trace of 25N-NB-2-OH-3-Me (18).** Purity (Peak area): 100%; Wavelength: 220 nm.

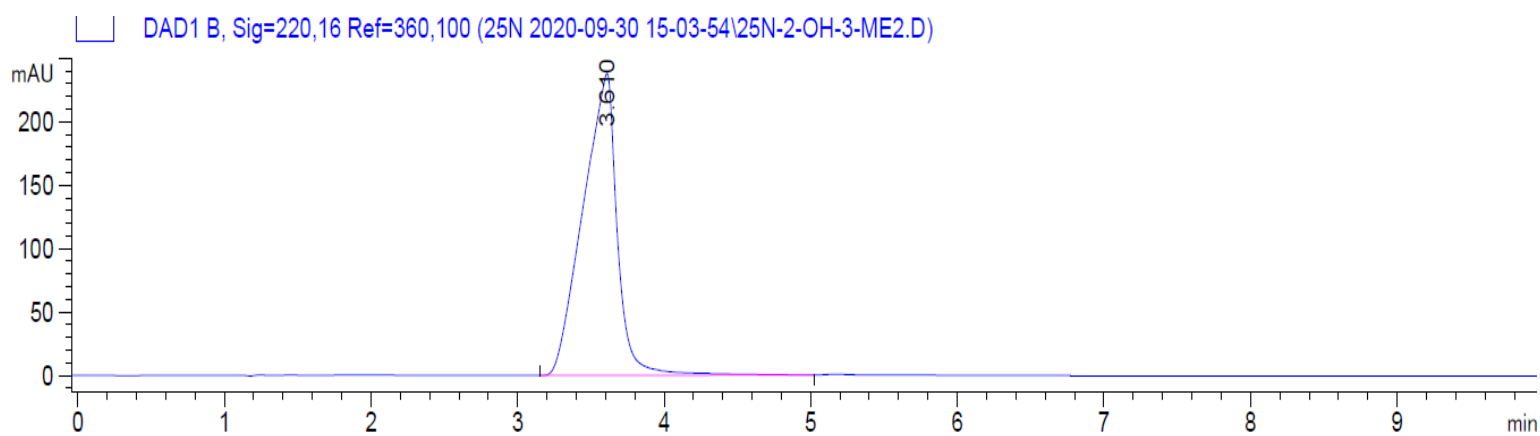

**HPLC Trace of 25N-NB-2-MeO-3-F (19).** Purity (Peak area): 96.1%; Wavelength: 220 nm.

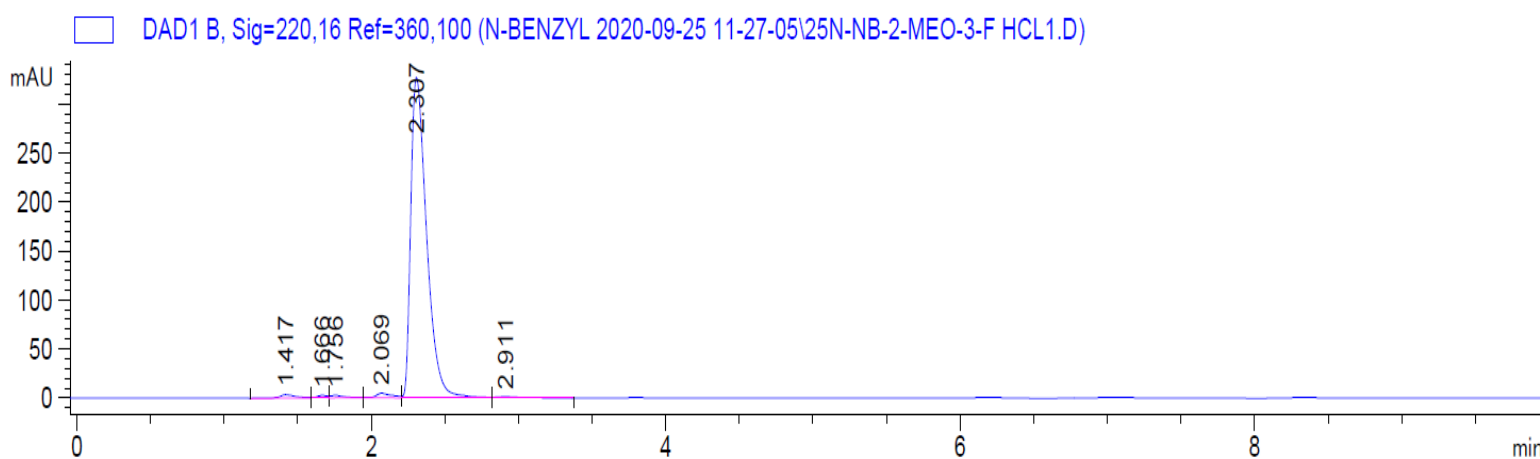

**HPLC Trace of 25N-NB-2,5-DiMeO (20).** Purity (Peak area): 95.6%; Wavelength: 220 nm.

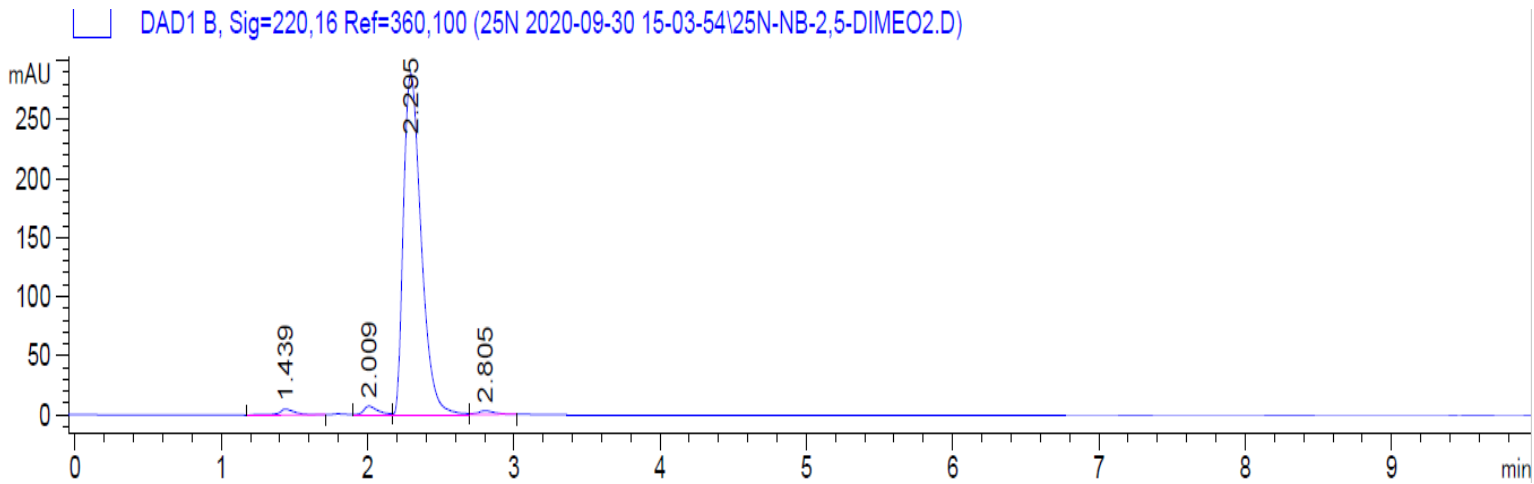

**HPLC Trace of 25N-NB-3-OH (21).** Purity (Peak area): 99.1%; Wavelength: 220 nm.

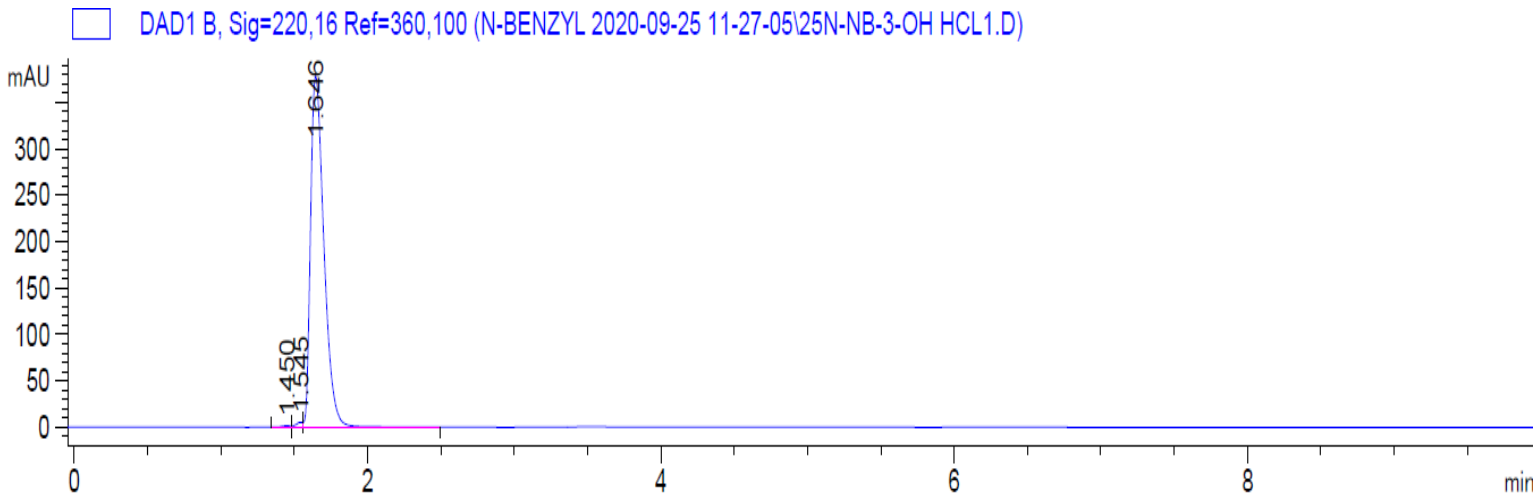

**HPLC Trace of 25N-NB-3-Me (22).** Purity (Peak area): 98.8%; Wavelength: 220 nm.

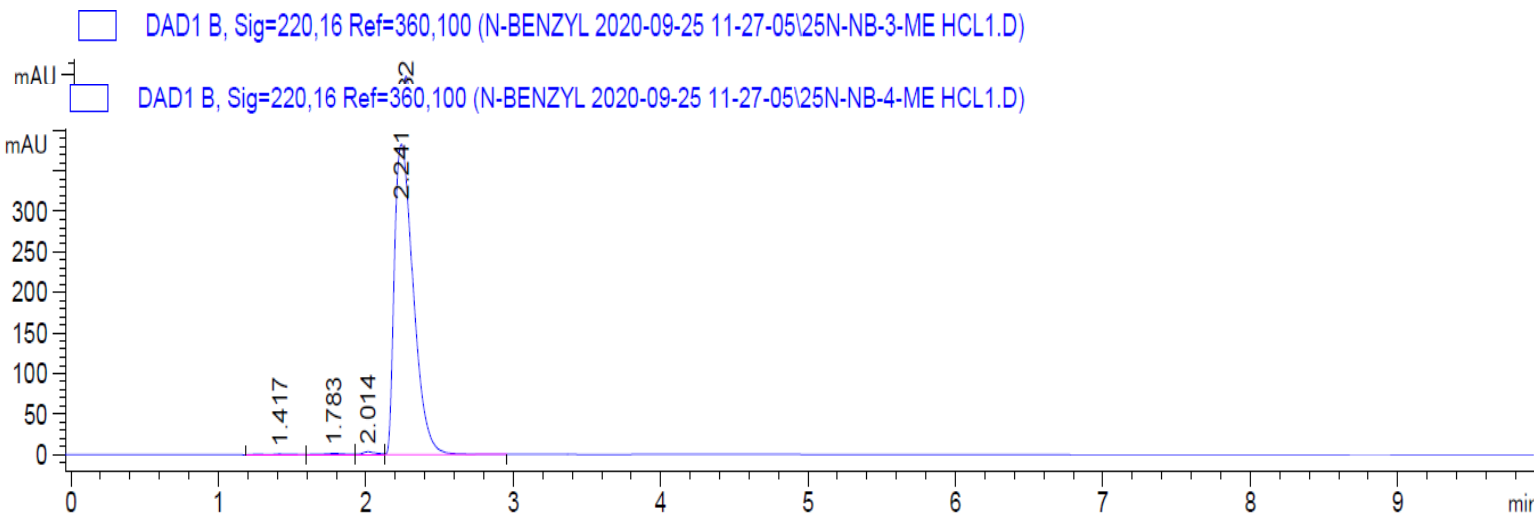

**HPLC Trace of 25N-NB-4-Me (23).** Purity (Peak area): 98.4%; Wavelength: 220 nm.

**HPLC Trace of 25N-NB-3-F (24).** Purity (Peak area): 100%; Wavelength: 220 nm.

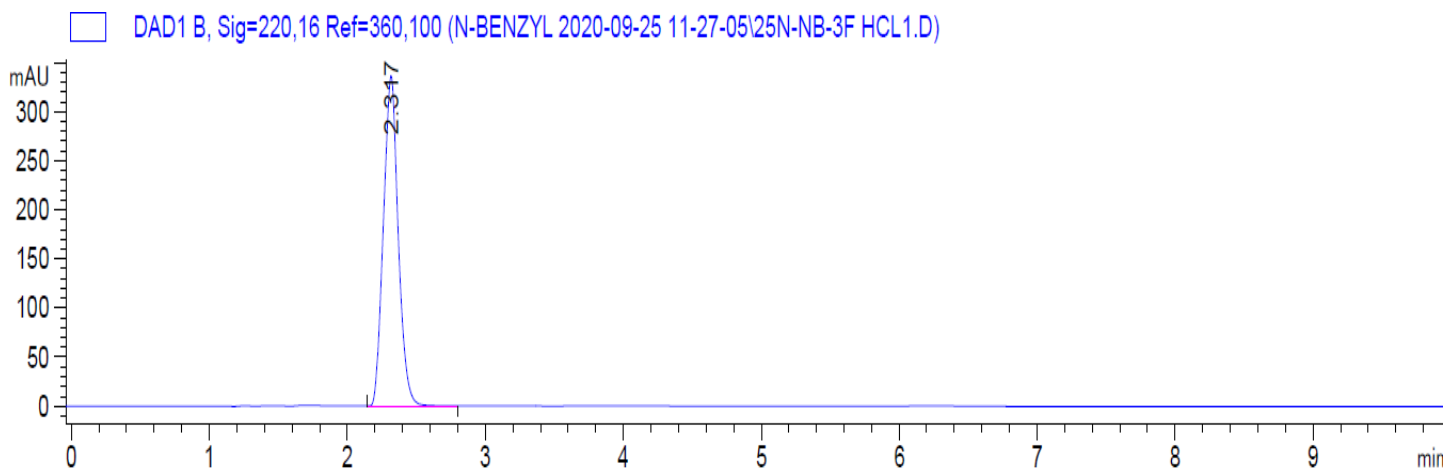

**HPLC Trace of 25N-NB-4-F (25).** Purity (Peak area): 99.4%; Wavelength: 220 nm.

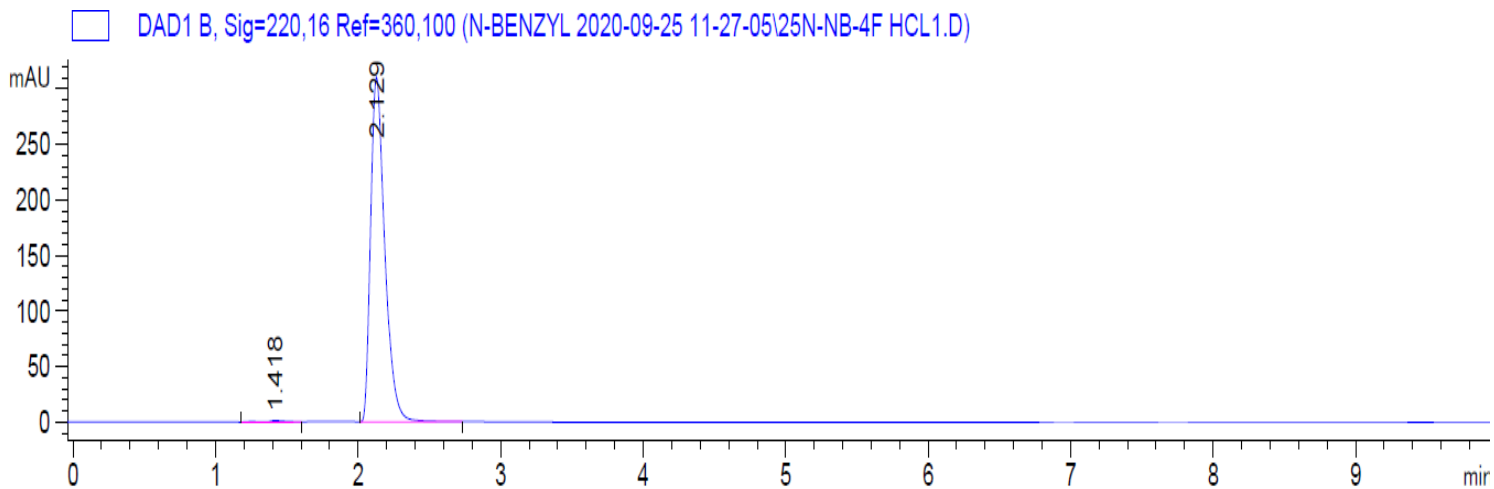



**HPLC trace of 25D-N1-Nap (26).** Purity (Peak area): 100%; Wavelength: 220 nm.

DAD1 B, Sig=220,16 Ref=360,100 (N-BENZYL 2022-02-11 19-36-26\25D-N1-NAP HCL1.D)

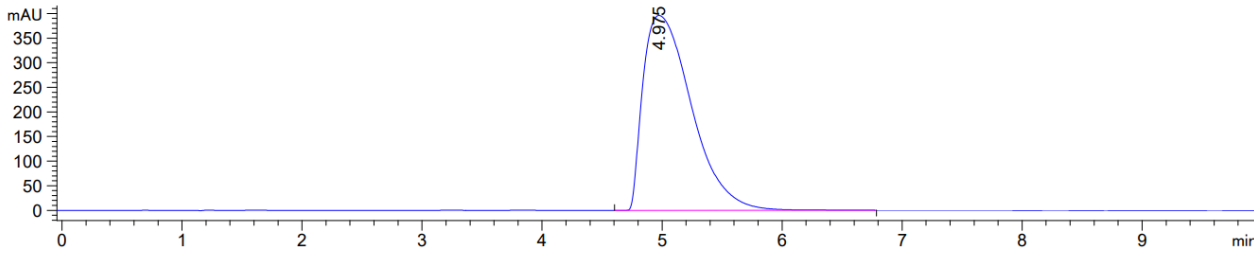

**HPLC trace of 25D-NBPh (27).** Purity (Peak area): 98.9%; Wavelength: 220 nm.

DAD1 B, Sig=220,16 Ref=360,100 (N-BENZYL 2022-02-11 19-36-26\25D-NBPh HCL1.D)

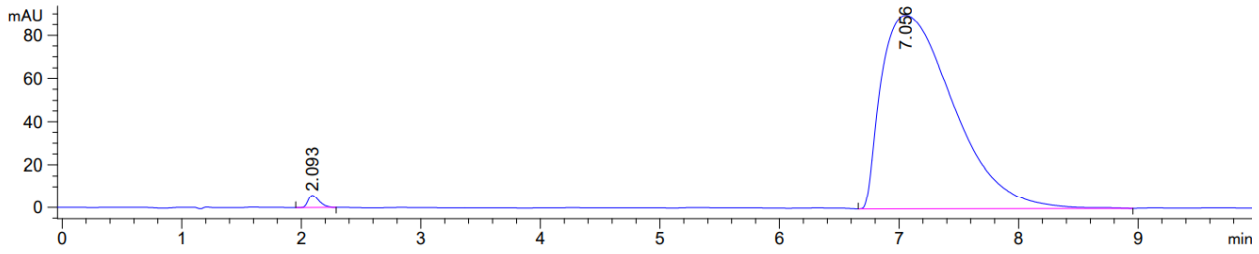

**HPLC trace of 25O-N1-Nap (28).** Purity (Peak area): 100%; Wavelength: 220 nm.

DAD1 B, Sig=220,16 Ref=360,100 (N-BENZYL 2022-02-14 20-13-56\2CO-N1-NAP HCL.D)

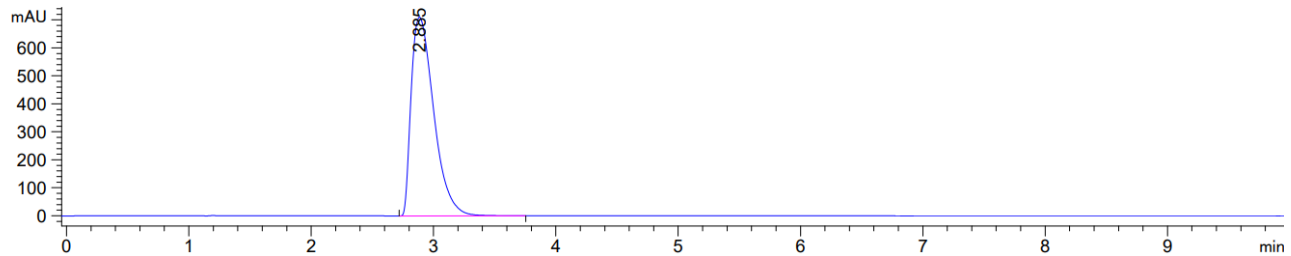

**HPLC trace of 2C2-N1-Nap (29).** Purity (Peak area): 99.8%; Wavelength: 220 nm.

DAD1 B, Sig=220,16 Ref=360,100 (N-BENZYL 2022-02-14 20-13-56\2C2-N1-NAP HCL2.D)

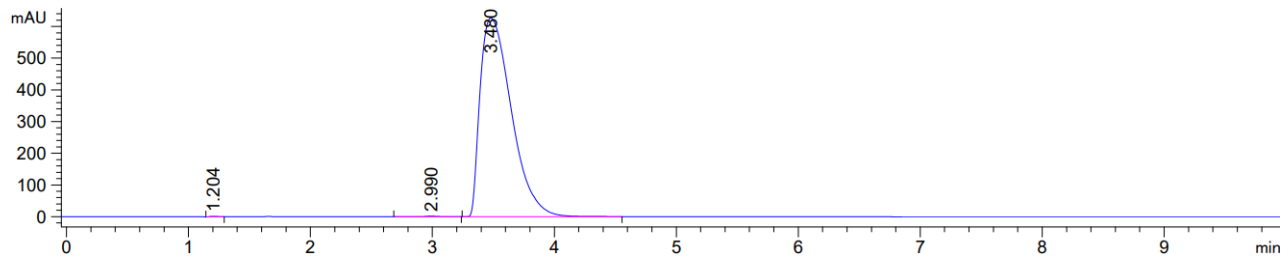

**HPLC trace of Psi-DOB-N1-Nap (30).** Purity (Peak area): 98.3%; Wavelength: 220 nm.

DAD1 B, Sig=220,16 Ref=360,100 (N-BENZYL 2022-02-14 20-13-56\PSI-DOB-N1-NAP HCL.D)

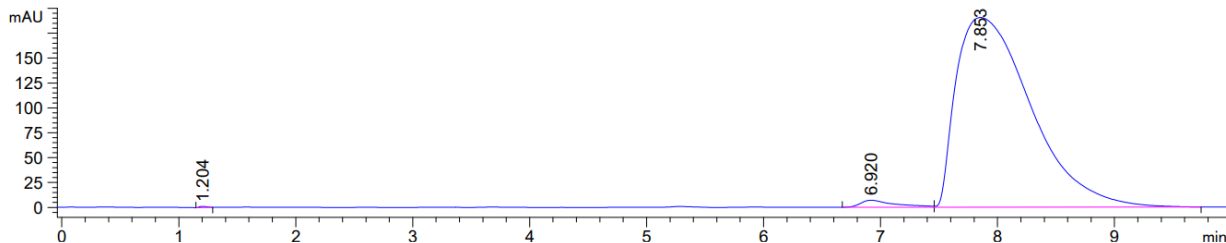

**HPLC Trace of 2C2-NBOMe (31).** Purity (Peak area): 100%; Wavelength: 220 nm.

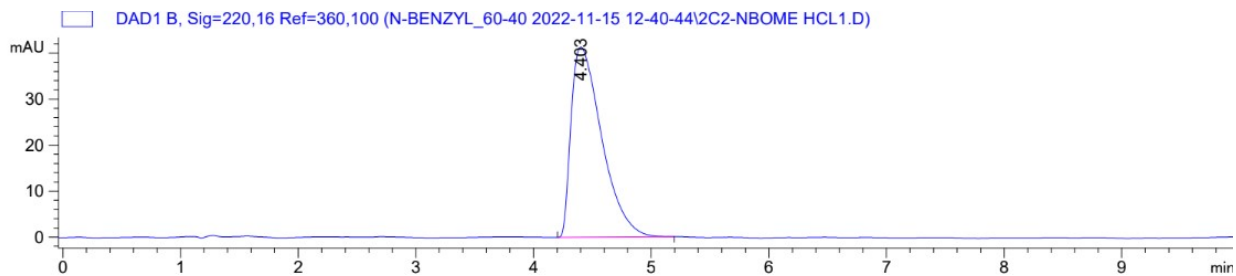

**HPLC Trace of 250-NBOME (32).** Purity (Peak area): 99.5%; Wavelength: 220 nm.

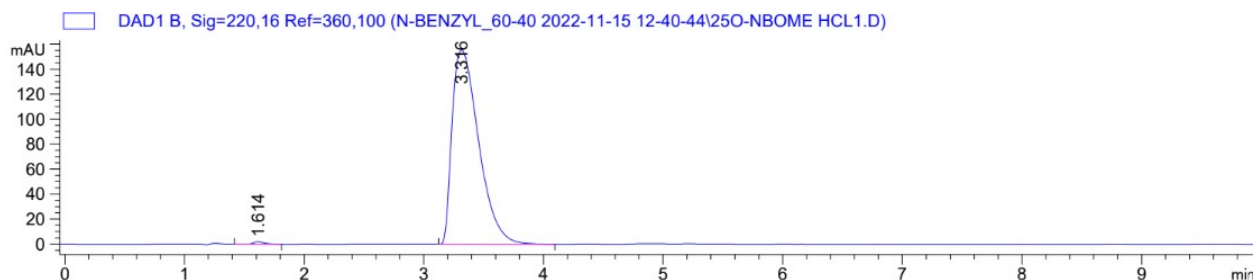

**HPLC Trace of 250-NBcP (33).** Purity (Peak area): 100%; Wavelength: 220 nm.

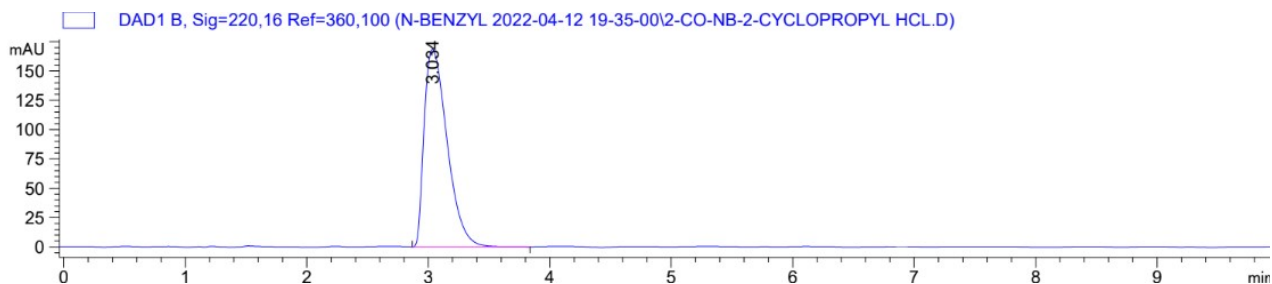

**HPLC Trace of 250-NB-3-I (34).** Purity (Peak area): 99.3%; Wavelength: 220 nm.

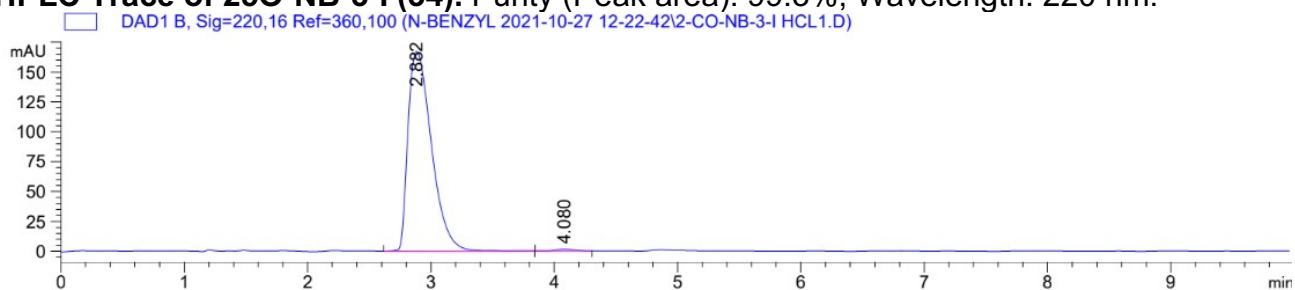

**HPLC Trace of 25O-NBPh-10'-OH (35).** Purity (Peak area): 97.8%; Wavelength: 220 nm.

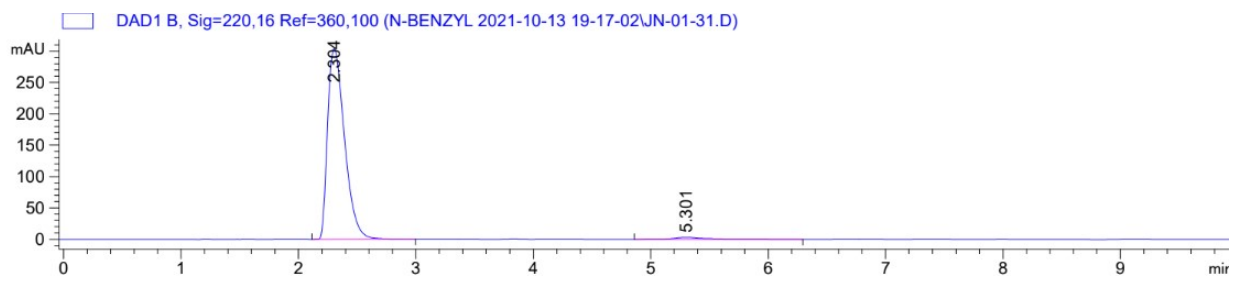

Supplement: 41467_2023_44016_MOESM6_ESM.pdf [file 41467_2023_44016_MOESM6_ESM.pdf]
