# Supplementary material for: Identification of 5-HT2A receptor signaling pathways associated with psychedelic potential
Source: PubMed Central journal article supplement (PMC10724237; doi:10.1038/s41467-023-44016-1), 2023-12-15
Supplement: 41467_2023_44016_MOESM3_ESM.pdf [file 41467_2023_44016_MOESM3_ESM.pdf]

## **Description of Additional Supplementary items**

**File name: Supplementary file 1**

**Description:** Contains  $^1\text{H}$ ,  $^{13}\text{C}$ , and  $^{19}\text{F}$  NMR chemical shift assignments for synthesized compounds

**File name: Supplementary file 2**

**Description:** Contains  $^1\text{H}$ ,  $^{13}\text{C}$ , and  $^{19}\text{F}$  NMR spectra for synthesized compounds

**File name: Supplementary file 3**

**Description:** HPLC traces for synthesized compounds

**File name: Supplementary file 4**

**Description:** Initial coordinate and simulation input file for 25CN-NBOH MD simulation

**File name: Supplementary file 5**

**Description:** Final coordinate and simulation output file for 25CN-NBOH MD simulation

**File name: Supplementary file 6**

**Description:** Initial coordinate and simulation input file for 25N-N1-Nap (16) MD simulation

**File name: Supplementary file 7**

**Description:** Final coordinate and simulation output file for 25N-N1-Nap (16) MD simulation
